# Supplementary material for: Comparative transcriptome analysis revealed key factors for differential cadmium transport and retention in roots of two contrasting peanut cultivars
Source: BMC Genomics. 2018 Dec 17;19:938. doi: 10.1186/s12864-018-5304-7 (PMC6296094; doi:10.1186/s12864-018-5304-7)
Supplement: Supplementary file 4 — Table S4. Gene expression analysis for all sample libraries. (XLSX 5503 kb) [file 12864_2018_5304_MOESM4_ESM.xlsx]

## Sheet: Sheet1
Additional file 4: Table S4 Gene expression analysis for all sample libraries
Gene ID	Transcript IDs	FPKM
		FCd_1	FCd_2	FCK_1	FCK_2	SCd_1	SCd_2	SCK_1	SCK_2
107646215	XM_016350417.1	7009.93	8465.38	5115.99	4794.14	9415.83	10128.2	5923.8	12118.1
107493112	XM_016114188.2	6891.91	8473.25	5665.41	4821.21	10333.3	10577.2	6217.03	13064.6
107639016	BGI_novel_T017652,XM_016342423.2	3479.04	2742.9	3274.68	2596.26	2205.45	2509.75	1733.48	2616.09
107483514	XM_016104137.2	3201.66	2611.48	3208.94	2519.15	1877.96	2304.47	1861.43	2764.64
107467827	BGI_novel_T011299,XM_016087029.2	2191.43	2706.99	1565.3	1899.43	1465.64	1188.26	804.46	1130.41
107468006	XM_016087241.2,XM_021131646.1,XM_021131647.1,XM_021131648.1	2045.31	1162.35	1939.31	3095.11	638.71	1433.57	952.73	1165.86
107618889	XM_016321064.2	1820.37	1235.54	1742.95	2136.06	506.69	902.94	807.21	995.01
107608839	XM_016310583.2	1819.54	2053.12	977.05	897.83	2931.36	3088.86	1089.53	2287.48
107638903	XM_016342305.2	1809.43	1488.53	1294.5	1398.21	1475.47	2091.51	1641.5	2502.8
107612830	XM_016314585.2	1780.37	2121.56	1426.8	1996.19	2889.3	3000.47	894.5	2400.47
107457689	XM_016075851.2	1690.75	2125.71	1433.11	1561.69	2231.17	2450.72	845.52	1771.22
107496082	XM_016117284.2	1572.85	1206.73	1277.06	1302.38	1072.74	1408.12	717.89	1040.34
107461713	XM_016080255.2	1530.69	1806.8	1216.08	1642.7	2279.64	2409.75	726.12	2021.79
107619761	BGI_novel_T026277,BGI_novel_T026278,BGI_novel_T026279,BGI_novel_T026280,BGI_novel_T026281,BGI_novel_T026282,BGI_novel_T026283,BGI_novel_T026284,BGI_novel_T026285,XM_016322051.2,XM_021110501.1,XM_021110502.1	1449.66	955.38	1335.63	1823.89	522.2	918.71	675.96	896.99
107460699	XM_016079081.2	1448.41	1196.54	305.62	441.92	1033.18	1709.32	393.55	817.24
BGI_novel_G004396	BGI_novel_T028347	1374.89	784.96	895.25	1503.23	927.16	1240.58	814.16	930.34
107488647	XM_016109401.2,XM_021142412.1	1260.99	1808.36	1220.49	1105.04	1432.18	1451.68	1130.98	1660.98
107638421	XM_016341675.2	1247.83	916.55	994.37	1017.46	816.65	1052.34	549.83	770.91
107617360	XM_016319109.2,XM_021110671.1,XM_021110672.1	1230.79	768.41	1534.6	1664.78	741.78	943.84	657.43	795.36
107616532	XM_016318484.2	1192.85	992.36	632.01	1620.71	911.76	1028.88	604.19	784.68
107474428	XM_016094050.2	1178.38	1516.86	902.78	589.67	1079.08	1294.19	510.21	548.94
110273878	XR_002365322.1	1153.56	1125.11	841.6	696.36	1369.91	1355.22	846.14	1697.17
107493771	XM_016114821.2	1152.42	913.22	931.32	1443.26	639.94	1204.78	213.94	673.73
107630164	XM_016333229.2	1122.83	633.85	1085.05	2036.12	276.33	594.36	322.46	350.46
107643051	XM_016346588.2	1075.04	1372.79	877.53	905.99	1704.79	1913.46	484.92	1328.24
107631215	XM_016334581.2	1065.67	1808.76	1624.81	841.35	1820.54	1260.54	635.11	1527.42
107494409	XM_016115447.2	1061.06	1750.36	1258.24	604.51	2294.76	1566.5	1018.47	1884.96
107643279	XM_016346873.2	1054.07	1463.24	973.82	903.22	1085.59	1138.6	925.17	1368.12
107467920	XM_016087146.2	1048.02	696.19	1191.93	1283.08	585.31	810.51	532.41	680.16
107638927	BGI_novel_T013720,XM_016342323.2	1042.79	825.7	810.39	788.98	743.83	1099.08	932.8	1398.23
107635757	XM_016339324.2	1033.7	386.14	212.64	1352.51	445.49	931.43	358.67	531.68
107629608	XM_016332431.2	987.22	1145.91	1258.21	1087.84	947.23	814.52	421.06	801.92
107625568	XM_016328241.2	975.05	1577.2	1379.89	660.1	1869.63	1496.92	903.15	1236.17
107606033	XM_021106365.1,XR_002350505.1	925.32	682.1	161.43	234.86	627.75	1057.49	214.76	412.09
107612720	XM_016314433.2	891.74	694.55	989.3	986.48	567.19	667.4	481.45	549.92
107617712	BGI_novel_T026400,XM_016319552.2	869.36	1229.23	693.48	909.57	737.26	497.57	375.55	560.3
107467626	XM_021132045.1	863.33	631.51	380.92	1176.72	609.04	700.72	423.82	515.23
107604810	XM_016306504.2	848.42	1227.22	902.73	412.29	1587.9	1171.84	693.45	1250.78
107644923	XM_016348886.2,XM_021103337.1,XM_021103338.1	828.81	590.37	230.09	1670.25	302.19	313.27	272.31	207.54
107608787	XR_002350960.1	823.56	1268.43	1274.25	767.9	771.6	466.96	354.3	745.33
107618002	XM_016319910.2	796.73	616.8	1554.53	974.03	182.87	415.27	394.71	478.58
107488235	XM_016108946.2	775.61	1048.46	637.1	635.34	1197.86	1285.23	297.41	963.78
107645286	XM_016349274.1	769.12	971.48	733.23	532.64	695.35	750.59	286.4	650.51
107635777	XM_016339375.2,XM_021115600.1	760.47	966.46	936.23	596.22	1095.6	958.61	934.41	1008.96
107480783	XM_016100955.2	748.12	1400.32	1001	627.04	1092.54	851.61	427.72	931.62
107617327	XM_016319067.2	743.77	723.91	961.91	850.43	634.88	737.85	563.86	686.16
107643277	BGI_novel_T019277,XM_016346871.2	734.85	694.08	958.11	859.16	472.99	509.67	315.11	493.37
107478858	XM_016099011.2	691.97	545.55	820.1	856.71	432.84	506.6	369.64	416.29
107644115	XM_016347920.2	663.62	661.93	559.26	586.86	573.45	579.28	264.65	388.5
BGI_novel_G001964	BGI_novel_T013092	642.87	265.42	404.3	1198.09	105.1	285.63	106.65	135.55
107638345	XM_016341578.2	637.8	787.4	721.62	426.64	853.14	1164.6	410.21	945.19
107617624	BGI_novel_T026644,XM_016319434.2	606.84	683.68	480.25	530.43	470.51	577.38	718.12	829.22
107623041	XM_016325171.2,XM_021114816.1	599.64	747.35	571.49	651.6	1032.13	907.21	416.6	810.79
107629166	XM_016331880.2	593.19	642.04	708.67	555.32	472.58	522.59	353.82	383.56
107474868	XM_016094515.1	589.66	1085.71	1000.19	440.76	1307.62	850.95	703.78	857.93
107609966	XM_016312029.2	583.09	604.94	648.13	505.92	592.43	673.11	341.42	480.57
107485769	XM_016106302.2	579.01	481.56	673.71	943.57	358.74	338.49	223.2	307.44
107604827	XM_016306527.2	573.3	439.2	479.85	701.76	421.15	594.03	411.61	480.7
107477212	XM_016097198.2	565.48	659.95	765.96	648.5	517.42	446.73	226.19	403.29
107463213	XM_016081973.2	564.32	480.02	348.27	448.28	640.8	994.2	829.86	1007.98
110268780	XR_002357245.1	563.27	455.42	352.95	527.07	384.55	450.05	420.7	652.59
107470141	XM_016089533.2	561.69	512.43	424.78	394.81	415.3	531.37	322.58	453.01
107467956	XM_016087184.2	557.45	37.39	331.98	1885.35	13.83	43.19	17.23	8.59
107638902	XM_016342302.2	555.27	314.62	118.37	238.01	95.06	247.27	923.91	483.68
107617865	XM_016319738.1	540.89	692.54	612.53	417.19	803.21	630.56	315.2	682.68
107643167	XM_016346746.2	537.81	573.02	344.2	262.63	335.13	519.62	289.13	444.09
107487606	XM_016108272.2	536.17	349.62	660.6	831.93	190.36	323.83	159.36	204.58
107645251	BGI_novel_T020637,BGI_novel_T020638,BGI_novel_T020639,BGI_novel_T020640,BGI_novel_T020641,XM_016349237.2,XM_016349238.2	529.98	434.47	552.03	583.37	374.45	536.58	190.59	365.6
107466341	XM_016085309.2	527.65	1092.4	990.24	576.04	892.5	498.04	580.19	1265.86
107494407	XM_016115446.2	521.04	380.96	441.73	644.51	348.54	532.91	338.74	398.66
107467925	XM_016087151.1	520.03	722.95	555.82	416.72	445.26	425.03	142.03	532.04
107629383	XM_021120547.1	516.96	201.59	168.52	223.21	113.04	204.83	129.82	242.91
107482936	XM_016103523.2,XM_021139917.1,XR_002373393.1,XR_002373394.1	516.93	376.95	596.74	726.04	226.85	228.29	276.45	201.69
107630193	XM_016333267.2	513.77	404.63	605.42	763.76	263.79	238.08	151.98	217.6
BGI_novel_G000381	BGI_novel_T002471	508.79	506.96	707.44	599.88	189.06	216.35	135.1	204.71
107490478	XM_021143230.1	507.65	543.72	389.74	437.67	411.88	411.31	204.07	307.91
107458442	XM_016076647.2	502.87	287.73	446.69	516.68	216.59	292.08	168.38	192.09
107608895	BGI_novel_T022733,BGI_novel_T022734,XM_016310664.2	497.96	540.47	742.84	488.26	471.28	414.35	474.62	480.69
107630710	XM_016333915.2,XM_016333916.2	491.59	225.23	470.81	468.73	212.26	220.59	33.26	30.3
107625356	XM_016327970.2	485.71	590.23	414.01	302	395.43	477.59	227.06	230.74
107605948	XM_016307903.2,XM_021106313.1	473	424.59	450.78	439.31	456.39	450.92	760.64	455.98
107609665	XM_016311674.2	468.23	1546.69	758.33	484.17	765.03	379.86	219.44	587.14
107630183	XM_016333259.2	465.74	192.16	382.97	726.94	50.41	140.6	52.48	74.14
107463224	BGI_novel_T000943,BGI_novel_T000944,BGI_novel_T000945,XM_016081985.2,XR_001586898.2	465.64	361.38	308.96	352.64	292.4	484.28	440.55	856.28
107635611	XM_016339128.2	459.17	342.05	615.28	574.91	315.02	400.19	319.57	301.86
107645667	XM_016349739.2	457.23	386.81	601.36	517.79	355.99	418.22	341.84	375.65
107613392	XM_016315354.2	453.94	559.21	641.97	383.6	617.66	319.3	205.1	273.22
107483151	XM_016103773.2	452.92	310.78	840.87	600.3	149.69	237.06	279.36	428.15
107476269	XM_016096060.2,XM_016096061.2	449.9	287.09	477.91	442.24	173.6	232.46	188.46	206.28
107637242	XM_016340677.2	445.53	730.6	778.64	566.09	509.9	334.83	291.12	499.63
107605969	XM_016307929.2	438.85	158.2	252.82	193.88	57.11	82.07	26.78	41.82
107476180	XM_016095942.2	427.96	294.23	594.77	537.71	256.1	337.63	280.56	283.99
107608810	XM_016310543.1	425.28	237.38	372.3	419.89	168.07	223.09	140.99	164.8
107635276	XM_016338705.2	420.73	396.35	422.39	413.7	361.26	423.73	354.48	367.2
107462779	XM_016081440.2	420.62	495.99	539.4	325.85	583.47	299.8	172	231.08
107467969	XM_016087197.2	419.79	243.07	704.03	464.8	58.75	184.96	144.13	175.68
107614145	XM_016316371.2	416.47	299.16	513.32	520.41	255.87	347.24	258.71	278.85
107492253	XM_016113254.2	413.16	293.95	149.69	359.27	323.64	451.84	230.05	307.85
107638297	XM_016341508.2,XM_016341509.2,XM_021120371.1	410.69	680	625.01	438.13	402.36	251.9	242.03	349.44
107459687	XM_016077911.1	409.87	427.13	489.82	496.74	317.96	315.91	151.89	243.7
107606164	XM_016308165.2	407.67	324.42	403.12	420.41	363.65	396.46	362.64	333.76
107460150	XM_016078477.2	405.96	480.77	509.55	388.93	492.01	528.64	280.04	417.89
107485982	XM_016106529.2	403.32	393.83	713.96	500.01	387.57	390.26	409.76	448.48
107619297	XM_016321555.2	402.51	373.89	704.01	502.59	325.18	363.1	300.51	364.06
107474095	XM_016093681.2,XM_021136314.1	402.11	488.82	489.46	305	546	484.79	433.97	500.85
107466751	XM_016085760.2	399.19	728.91	833.06	548.67	461.1	271.24	211.34	456.66
107491681	XM_016112574.2	396.76	353.2	459.22	389.29	312.08	363.38	299.45	368.19
BGI_novel_G000779	BGI_novel_T005224	395.02	179.73	293.28	681.13	227.73	272.03	335.48	88.77
107632799	BGI_novel_T013322,BGI_novel_T013323,XM_016336454.2	394.81	556.4	564.31	326.82	372.5	385.79	143.67	439.39
107633981	XM_016337571.2	393.56	344.11	464.21	433.27	297.12	337.91	232.23	330.09
107636641	XM_016340141.2	389.84	214.86	262.52	599.91	144.94	240.62	118.13	239.2
107605639	XM_016307584.2	387.97	542.13	445.91	338.38	258.33	312.9	138.2	300.05
107482439	XM_016102927.2,XM_016102928.2	386.22	654.08	581.1	442.99	367.91	222.56	221.06	353.55
107609632	BGI_novel_T023058,XM_016311638.2,XM_021106057.1	386.2	487.3	552.27	432.6	496.03	424.06	315.02	416.13
107638913	BGI_novel_T013719,XM_016342314.2	384.63	244.65	227.45	271.12	269.15	478.23	465.91	684.1
107479757	XM_016099859.2	384.27	162.36	351.22	371.62	165.66	178.97	30.78	17.59
107460818	XM_016079228.2	382.67	495.79	675.76	339.42	447.34	435.13	211.42	489.67
BGI_novel_G000783	BGI_novel_T005254	382.6	502.14	280.4	223.14	457.04	496.57	239.1	401.58
107637527	BGI_novel_T013638,XM_016340939.2,XM_021104331.1	374.2	307.6	357.21	196.2	80.85	144.26	21.8	83.42
107648185	XM_016352158.2	373.96	365.66	459.68	363.19	310.52	333.56	294.14	364.79
BGI_novel_G003146	BGI_novel_T020553	373.91	448.13	252.72	272	683.68	537.11	219.86	456.63
107466287	XM_016085270.2	371.55	220.76	219.92	499.18	134.1	239.73	106.83	218.53
107484932	XM_016105487.2	369.97	92.68	79.67	129.24	24.78	50.7	29.54	93.21
107460609	XM_016078989.2,XM_021128691.1	369.29	404.11	423.58	376.58	434.66	410.75	622.33	413.26
107613266	XM_016315191.2,XM_016315192.2,XM_021108589.1	361.37	771.61	630.63	325.32	1154.55	709.99	505.87	1026.27
107629428	XM_016332220.2	358.83	302.75	416.8	521.16	266.36	353.86	176.99	275.27
107476911	XM_016096857.2	356.43	376.83	428.56	371.48	270.77	295.99	198.66	222.42
107629212	XM_016331934.2	355.4	625.03	519.99	341.23	1100.65	734.25	493.41	692.97
107476285	XM_016096086.2	350.08	351.43	249.37	239.85	340.65	353.51	112.77	306.11
107638690	XM_016342045.2,XM_021120613.1	349.78	210.51	484.06	713.45	142.76	155.42	183.62	128.71
107606260	XM_016308295.2	349.34	441.82	496.91	394.09	310.62	281.76	194.56	232.51
107488361	XM_016109092.2	347.64	394.76	247.49	176.15	217.08	312.09	143.82	244.62
107487674	BGI_novel_T005437,XM_016108369.2	346.85	501.92	625.04	314.83	596.68	476.75	424.07	532.19
107629857	XM_016332796.2	346.55	306.17	526.4	357.32	308.43	326.18	280.77	325.03
107489373	XM_016110125.2	343.42	282.19	220.4	347.4	529.1	484.65	233.43	351.08
107464768	XM_016083732.2	339.45	156.16	209.44	646.6	203.93	176.59	31.27	62.17
107642727	XM_016346187.2	339.16	231.8	363.22	646.61	207.1	284.42	231.5	149.54
107621542	XM_021114033.1	338.31	268.07	358.8	485.78	326.43	334.89	818.49	257.62
107630523	XM_016333692.2	338.21	264.36	452.79	443.88	227.62	285.54	221.13	259.34
107473451	XM_016093010.2	335.8	361.72	355.12	293.4	246.42	275.59	86.49	230.72
107642949	XM_016346463.2	331.15	233.69	458.68	412.27	192.12	263.97	202.72	232.47
107476714	XM_016096579.2	330.55	220.35	180.85	91.07	73.93	101.77	18.67	51.32
107469696	XM_016089076.2,XM_021133775.1	330.17	348.58	236.99	285.91	288.8	392.85	209.76	289.09
BGI_novel_G004233	BGI_novel_T027531	329.6	339.23	221	235.2	272.1	330.78	182.3	252.98
107481364	XM_016101648.2	327.33	247.39	456.78	442.6	209.01	262.68	205.7	233.16
107492339	XM_016113346.2	326.99	356.89	436.87	464.57	346.73	327.44	612.63	494.6
107644674	XM_016348593.2,XM_016348594.2,XM_016348595.2	326.72	247.86	408.54	386.44	221.78	267.05	222.84	248.36
107613471	XM_016315477.2	325.72	377.96	220.74	270.54	269.56	224.81	544.52	325.99
107629122	XM_016331824.2	325.59	253.63	391.14	367.23	143.48	278.51	105.65	207.17
107467528	BGI_novel_T011138,XM_016086650.2	324.55	277.82	540.52	379.78	245.53	274.83	233.16	260.65
107462227	XM_016080796.1	322.5	127.42	192.44	580.27	79.14	268.75	68.95	94.58
107613338	XM_016315298.2	320.37	208.1	482.02	400.72	72.27	116.64	205.18	114.98
107646031	XM_016350215.2	319.27	370.38	408.86	451.77	388.82	352.99	915.3	519.5
107495781	XM_016116955.2	318.8	285.92	381.79	405.16	269.54	325.99	146.7	311.73
107630073	XM_016333104.2	318.72	161.65	336.23	430.44	111.65	202.57	117.38	146.72
107632314	XM_016336009.2	316.58	372.13	353.79	298.5	306.66	331.61	111.34	286.04
107610187	XM_016312288.2	314.87	204.91	16.79	64.7	137.09	310.4	50.91	115.03
107633730	XM_016337334.2	312.21	272.4	84.07	100.4	222.84	343.68	106.92	216.36
107608857	XM_016310609.2	310.16	249.6	273.53	270.23	343.05	408.01	321.96	460.87
107645922	XM_016350075.2,XM_016350076.2	308.82	653.77	730.2	349.07	723.73	516.93	351.24	698.7
107608741	XM_016310459.2	308.45	255.4	321.23	326.98	231	266.93	210.85	229.91
107631259	BGI_novel_T016827,XM_016334643.2	308.15	222.85	397.25	422.75	133.18	318.69	134.06	217.49
107493135	BGI_novel_T007087,XM_016114217.2,XM_021144174.1,XR_001592904.2	306.53	275.3	319.9	332.76	243.37	333.28	111.25	219.06
107612796	XM_016314547.1	306.08	347.02	346.73	327.18	217.99	232.87	104.15	201.34
107488054	XM_016108753.2	305.73	214.61	417.11	412.65	180.1	247.07	186.89	199.26
107617981	XM_016319879.2	305.28	206.07	422.23	406.28	170.19	233.16	189.97	210.08
107644853	XM_016348792.2	305.14	238.28	458.5	330.07	220.71	234.32	212.34	241.2
107458104	XM_016076320.2	304.53	278.53	227.69	288.03	0.29	1.12	0.37	0.14
107470345	XM_016089734.2	304.39	334.16	417.53	347.44	351.75	326.85	412.37	367.74
107468750	XM_016088111.2	302.98	234.88	300.67	427.47	261.64	283.73	483.68	206.2
107639467	XM_016342974.2	302.86	500.16	564.56	278.91	0.1	1.17	0.15	0.05
107461654	XM_016080198.2,XM_016080199.2	302.44	623.51	570	284.53	943.87	570.13	391.83	830.74
107605468	XM_016307355.2	302.38	186.42	359.49	429.76	150.13	229.95	152.96	171.57
107460209	XM_016078545.2	300	824.45	462.17	336.77	438.74	224.49	136.53	357.87
107635509	XM_016338994.2	299.79	227.63	366.86	355.19	185.6	222.14	165.08	212.48
107642304	BGI_novel_T018892,XM_021122739.1	298.71	377.81	139.03	142.22	230.68	330.98	68.74	152.64
107638828	XM_016342226.2	298.01	205.06	569.29	366.02	100.48	137.97	143.42	210.63
107476212	XM_016095980.2	297.48	263.01	250.34	266.6	195.2	238.92	159.59	199.33
107623163	XM_016325327.2	296.74	249.74	492.48	426.62	189.98	228.43	198.5	220.17
107482481	XM_016102997.2,XR_002373310.1	296.52	345.06	305.65	185.97	359.03	499.21	163.29	381.88
BGI_novel_G003327	BGI_novel_T021780	295.37	389.13	327.41	338.24	586.96	405.53	505.09	385.99
107629136	BGI_novel_T015524,XM_016331841.2	290.65	353.91	368.98	310.49	322.61	352.32	133.68	283.33
107491987	XM_016112935.2,XM_021126198.1	290.04	177.28	121.23	301.44	102.72	145.42	120.09	113.25
107483150	XM_016103772.2	289.97	207.29	230.27	290.74	106.16	220.8	162.92	183.47
107630155	BGI_novel_T015987,BGI_novel_T015988,BGI_novel_T015989,BGI_novel_T015990,XM_016333217.2	289.75	274.46	432.55	309.35	252.51	246.27	249.14	251.71
107465349	XM_016084333.2	289.61	223.4	278.2	160.72	78.14	137.75	36.02	72.75
107468533	XM_016087839.2	287.84	211.73	107.74	177.71	188.28	241.95	76.86	302.87
107617772	XM_016319636.2	287.27	196.01	310.7	337.23	144.57	207.24	152.58	176.99
107635726	XM_016339283.2	287.16	257.34	433.37	294.04	220.68	224.52	195.13	221.26
107461644	XM_016080186.2,XR_001586646.2	285.59	246.61	380.21	314.5	217.09	244.79	172.85	205.19
107623260	XM_016325446.2	284.53	202.83	387.72	359.49	173.84	224.97	179.53	200.7
107496677	BGI_novel_T008058,XM_016117989.2,XM_021127220.1	283.8	266.71	452.26	326.92	235.69	237.76	225.53	238.37
107628733	XM_016331315.2	282.63	189.58	374.25	379.86	176.65	238.82	190.41	181.05
107638600	BGI_novel_T004148,XM_016341937.2,XM_021120573.1	280.58	401.18	307.19	217.58	336.01	288.73	89.4	274.07
107623588	XM_016325911.2	280.52	231.87	417.46	343	172.6	233.35	142.61	194.1
107606068	XM_016308033.2	280.46	357.12	474.23	231.06	324.49	289.24	175.9	369.28
107606095	BGI_novel_T023390,XM_016308068.2	279.97	332.54	192.12	268.26	618.07	551.63	162.24	308.38
107496684	XM_016118004.2	279.65	125.18	118.66	173.28	96.89	150.05	444.26	331.39
107639106	XM_016342529.2,XM_016342538.2	279.42	236.16	416.83	336.84	216.69	240.39	211.1	233.42
107629126	XM_016331826.2	277.67	227.32	308.57	358.26	183.44	293.87	154.91	219.13
107476173	XM_016095933.2	277.54	281.72	259.69	269.82	299.97	308.67	215.2	270.38
107644308	XM_016348147.2	275.95	404.12	394.06	175.94	283.85	227.65	149.77	309.84
107622676	XM_016324660.2	275.24	157.39	138.87	287.73	232.39	245.41	178.28	485.61
107614121	XM_016316348.2	274.15	289.21	111.95	133.25	249.04	331.97	61.12	157.57
107481892	XM_016102246.2	273.97	243.06	286.54	289.11	217.77	259.18	180.55	190.52
107618498	XM_016320595.2	272.39	605.64	491.97	284.06	501.49	243.11	339.14	630.11
107490673	XM_016111472.2	270.59	169.19	301.82	345.78	156.71	225.04	158.75	169.22
107617128	XM_016318917.2	270.43	251.08	431.81	301.9	231.28	221.57	215.92	254.31
107638619	XM_016341964.2	270.12	327.33	372	297.2	286.11	270.21	261.32	273.07
107493029	XM_016114109.2	269.85	343.46	272.32	194.71	258.28	271.04	94.29	233.17
107619438	XM_016321731.2,XM_021110508.1	268.75	111.54	373.03	537.1	64.09	342.06	76.45	114.01
107608740	XM_016310458.2	268	214.34	263.2	277.07	207.02	233.73	147.46	200.84
107463234	XM_021125952.1	267.99	191.88	250.19	234.5	206.59	371.84	411.03	639.78
107635324	XM_016338780.2	267.98	185.95	397.1	361.45	155.61	209.42	167.11	175.87
107487695	XM_016108391.2	267.84	174.46	273.29	483.4	169.67	212.42	170.91	117.21
107476868	XM_016096797.2	265.63	218.84	290.01	327.02	181.38	292.08	154.73	213.52
107491556	XM_016112423.2,XR_002376326.1	265.18	354.5	192.17	241.98	523.02	443.66	182.15	337.04
107473557	BGI_novel_T028269,XM_016093125.2	265.12	187.9	321.42	304.82	148.4	201.43	154.21	159.5
110270381	XM_021119624.1	263.7	134.31	123.05	417.2	240.03	491.11	680.72	346.43
107606126	XM_016308112.2	263.41	232.7	312.55	312.86	243.14	204.05	206.68	172.66
107487222	XM_016107835.2	262.96	332.11	114.58	115.31	199.02	296.72	62.78	132.36
107486453	XM_016106992.2	259.46	227.39	225.27	323.44	82.21	105.98	63.26	82.94
107493803	XM_016114845.2	258.27	163.57	337.04	344.41	122.24	183.82	127.52	145.79
107612893	BGI_novel_T024404,XM_016314667.2	258.23	166.9	272.5	257.33	137.93	170.51	111.84	121.35
107606201	XM_016308212.2	257.86	415.12	346.38	383.21	178.28	95.32	79.54	150.4
107629048	XM_016331732.2	257.38	257.75	421.42	292.25	248.38	232.99	237.68	250.21
107476298	XM_016096100.2	256.58	221.69	284.86	245.86	141	200.89	433.71	389.23
107488639	XM_016109391.2	256.35	295.89	411.59	338.34	210.51	191.7	164.78	221.15
107470071	XM_016089452.2	255.53	186.58	347.93	322.24	163.98	204.88	178.81	185.45
107469677	XM_016089055.2	254.22	323.36	331.65	296.19	227.45	439.53	4.44	341.79
107622432	XM_016324312.2	253.28	268.38	367.9	302.03	271.5	244.5	366.31	310.26
107459596	XM_016077829.2	253	213.46	18.91	33.63	61.5	139.7	24.27	36.13
107643057	XM_016346600.2	252.78	161.35	372.13	344.17	134.21	193.57	148.91	158.74
107487487	XM_016108133.1	252.58	354.31	356.33	225.68	355.34	277.18	250.29	290.01
107609510	XM_016311501.2	252.4	400.1	385.37	148.19	117.47	101.32	30.55	186.49
107629219	XM_016331941.2	251.86	241.16	341.26	287.46	230.05	241.86	184.09	236.19
107467373	XM_016086450.2	250.2	170.58	264.49	298.35	122.05	175.76	121.91	143.23
107629127	BGI_novel_T015534,XM_016331827.2	248.59	192.61	296.85	280.07	130.84	220.41	101.38	166.7
107492460	XM_016113484.2	248.26	205.8	326.53	290.22	206.02	221.14	190	220.91
107468310	XM_016087579.2	248.06	211.55	253.94	299.59	187.07	205.76	157.18	228.52
107635622	XM_016339143.2	246.04	191.78	383.23	291.88	170.95	186.3	158.96	186.71
107490068	XM_016110840.2	245.52	339.54	400.15	243.32	381.52	312.27	327.71	341.23
107648744	XM_016352576.2	245.01	168.96	248.78	389.15	154.8	208.54	105.71	128.93
107635639	XM_016339163.2	244.58	171.57	309.31	304.09	148.51	183.77	144.71	164.73
107612042	XM_016313878.2	243.56	237.03	39.09	36.51	48.17	122	30.07	43.18
107605633	XM_016307578.2	243.53	305.65	360	146.55	45.31	81.53	30.01	60.27
107474036	XM_016093624.2	242.93	217.74	338.5	233.75	136.51	188.89	73.14	160.26
107469883	XM_016089271.2	241.17	184.48	385.17	337.63	129.74	168.64	154.05	155.54
107622683	XM_016324664.2	241.08	300.29	162.54	229.08	261.29	222.72	120.3	229.49
107480600	XM_016100747.2	240.76	416.94	276.57	150.4	452.48	322.62	149.64	283.18
107638155	XM_016341324.2	240.27	71.92	112.79	34.88	9.4	61.95	2.88	34.84
107482185	XM_016102588.2	239.08	252.46	309.74	251.38	241.83	247.49	184.83	228.35
107470009	XM_016089396.2	238.96	200.26	290.23	262.73	164.21	190.62	151.08	184.17
107471872	XM_016091390.2	238.49	306.93	164	240.83	260.3	229.35	126.77	237.16
107493371	XM_016114477.2	238.03	320.98	345.28	200.11	242.58	244.35	77.25	280.64
107476296	XM_016096097.2	236.68	157.54	286.28	355.01	154.73	176.96	130.89	170.81
107635734	XM_016339290.2	236.48	173.16	253.05	132.35	223.91	226.1	7.02	202.75
107464042	XM_016082942.2,XM_016082948.2,XM_021126106.1,XM_021126108.1	233.16	553.86	490.99	193.27	802.19	374.13	359.38	759.69
107638592	XM_016341929.2	232.76	68.12	266.05	284.7	24.31	89.15	125.82	94.76
107631353	XM_016334782.2	232.45	186.29	302.04	297.62	142.08	175.98	137.65	162.9
107494538	BGI_novel_T007487,XM_016115585.2	231.49	154.1	334.99	330.14	130.23	195.31	131.97	150.32
107492156	XM_016113148.2,XM_016113149.2	231.39	437.52	537.78	263.22	534.31	405.07	264.81	558.79
107635753	BGI_novel_T018870,XM_016339318.2	231.29	219.87	215.81	259.29	214.06	241.74	140.33	193.81
107481342	XM_016101624.2	229.9	166.38	298.21	297.65	136.74	180.03	141.16	167.77
107635475	XM_016338953.2	229.64	155.82	294.26	297.83	136.71	178.77	149.79	158.75
107643925	XM_016347683.2,XM_021124344.1	229.58	286.16	334.74	236.16	264.22	247.75	204.25	264.42
107619013	XM_016321217.2	229.22	148.02	298.65	294.12	131.32	183	145.38	143.55
107613458	BGI_novel_T023803,XM_016315462.2	229.13	89.47	128.48	454.14	56.81	215.68	41.63	64.78
107469145	XM_016088524.2	228.6	175.19	368.78	180.84	193.29	195.24	97.92	93.55
107465251	BGI_novel_T010551,XM_016084232.2,XM_016084233.2	228.05	152.03	242.12	289.21	142.77	207.7	130.22	158.34
107638539	XM_016341864.1	227.86	405.63	344.59	293.74	430.26	344.28	446.95	534.58
107622440	XM_016324320.2	227.82	178.24	313.8	282.96	176.06	205.8	173.91	193.16
107614127	XM_016316352.2	227.59	144.31	254.44	304.82	84.38	210.74	81.05	148.82
107637452	XM_021122256.1	226.97	122	132.29	289.14	220.04	308.79	486.28	332.41
107617877	XM_016319753.2	226.84	150.48	252.56	285.19	137.02	203.16	131.23	153.64
107638906	XM_016342303.2	226.36	157.04	82.94	113.07	35.9	83.68	285.94	145.76
107476865	XM_016096794.1	225.84	170.65	255.15	255.64	94.66	196.89	73.57	148.48
107460929	XM_016079360.2	224.58	331.07	328.13	343.02	147.27	102.43	72.49	140.38
107496135	XM_016117330.2	224.33	167.76	206.56	214.54	201.97	247.15	182.21	193.11
107645574	XM_016349627.1	223.86	139.65	316.34	319.26	117.82	172.5	136.12	142.46
107608642	XM_016310372.2	223.37	166.36	294.8	251.79	145.5	173.23	142.75	159.58
107458986	XM_016077207.2	223.3	147.71	346.38	349.39	77.68	122.65	189.83	127.34
107624240	XM_016326758.2	223.17	234.11	389.68	256.37	208.05	200.64	200.88	211.69
107461034	XM_016079472.2	222.67	304.45	332.62	298.87	237.84	209.91	127.76	176.47
107463497	XM_016082295.2	222.19	247.75	139.18	168.28	370.04	342.41	619.9	422.39
107648662	XM_016352471.2	221.74	167.88	272.17	281.72	145.2	193.01	134.86	158.57
107460876	XM_016079295.2	221.12	202.41	255.97	266.07	224.05	239.27	220.34	204.63
107631448	XM_016334893.2	220.51	226.99	186.56	159.95	190.92	224.94	151.56	263.14
107467152	XM_016086188.2,XM_016086189.2	220.16	240.89	160.39	185.72	177.28	206.77	226.28	270.6
107493757	XM_016114808.2	219.74	213.33	61.61	65.46	173.9	252.07	80.45	203.77
107460603	XM_016078983.2	219.26	85.16	151.84	119.15	25.87	35.85	10.84	19.89
107461527	XM_021129125.1,XR_002366667.1	218.45	237.38	77.85	88.85	203.8	272.08	61.93	116.58
107612363	XM_016314113.2	217.67	217.04	308.66	245.97	176.68	173.1	174.14	229.11
107465770	XM_016084743.2	217.22	210.89	201.63	197.27	155.22	214.39	75.33	197.81
107493609	XM_016114679.2	216.67	159.32	301.22	289.81	144.34	177.64	144.1	156.52
107613354	XM_016315318.2	216.52	309.42	379.77	201.69	326.16	248.85	272.59	302.96
107625629	XM_016328315.2	215.84	348.73	430.17	176.3	446.49	380.44	261.42	409.33
107609778	XM_016311804.2	215.38	143.44	211.82	124.07	140.81	112.6	44.42	74.12
107609856	XM_016311904.2	214.85	333.48	243.95	143.66	462.02	344.52	227.58	426.31
107625155	XM_016327737.2	214.79	173.44	289.62	225.75	132.27	185.68	87.79	156.88
107489781	XM_016110540.2	214.54	131.58	169.94	294.61	145.78	133.66	63.64	91.95
107466707	XM_016085714.2	214.31	140.28	282.67	282.33	133.67	176.93	147.33	143.92
107462221	XM_016080781.2	214.17	204.44	282.43	238.4	154.83	160.71	145.79	199.44
107618504	XM_016320597.2	214.08	168.55	268.84	245.14	146.05	182.66	128.03	159.51
107496004	XM_016117211.2	214.05	293.71	263.2	135.22	145.85	142.69	31.99	127.47
BGI_novel_G001251	BGI_novel_T008316	213.98	139.33	285.55	306.07	129.64	183.15	231.02	154.37
BGI_novel_G001250	BGI_novel_T008315	213.98	139.33	285.55	306.07	129.64	183.15	231.02	154.37
107478004	BGI_novel_T002813,BGI_novel_T002814,XM_016098101.2,XM_021137956.1	213.36	174.88	318.31	237.24	142.68	167.88	143.74	153.05
107606132	XM_016308119.2	213.22	255.5	192.96	196.9	324.89	247.15	99.74	281
107613918	XM_016316113.2,XR_001614227.2	212.54	174.09	292.75	272.72	167.93	191.17	131.79	151.49
107475009	XM_016094658.2	212.14	413.56	512.5	200.64	518.18	311.58	281.03	534.71
107635332	XM_016338793.2	211.96	130.65	357.2	390.19	92.05	133.07	62.37	100.91
107623188	XM_016325359.2,XM_021113116.1	210.99	62.75	98.42	205.38	12.72	32.56	4.95	9.47
107631103	XM_016334433.2	210.92	286.57	251.51	164.28	343.23	335.77	30.63	269.39
107459066	XM_016077277.2,XM_021127952.1	210.85	173.53	230.51	132.29	146.32	116.72	51.3	77.83
107642893	XM_016346398.2	210.5	177.23	85.82	137.56	177.45	277.03	104.71	225.78
107623198	XM_016325370.2	210.41	165.42	211.04	248.81	141.98	196.95	120.31	150.03
107460801	XM_016079201.2	209.29	269.8	149.23	196.99	533.18	457.01	153.78	261.44
107638570	XM_016341906.2	209.26	169.22	342.79	243.82	140.29	163.47	145.81	143.23
107476869	XM_016096800.2	208.71	162.75	226.51	222.38	107.88	197.63	84.95	146.21
107632203	XM_016335903.2	208.32	163.76	182.69	276.19	157.49	212.2	101.92	145.45
107631140	BGI_novel_T016671,BGI_novel_T016672,BGI_novel_T016673,XM_016334482.2,XM_021119355.1	208.03	185.19	308.32	253.19	174.71	185.23	155.78	160.28
107613172	XM_016315035.2	208.03	178.81	243.87	276.53	122.09	177.03	140.37	166.69
107496665	XM_016117972.2	207.44	181.11	220.69	229.19	173.26	199.35	140.48	169.96
107630820	XM_016334067.2	207.42	145.75	318.49	270.45	125.05	157.46	135.89	146.21
107459340	XM_016077563.2	206.25	217.65	380.8	260.67	198.13	182.73	207.75	215.72
107482253	XM_016102693.2	205.97	166.88	187.29	266.28	156.57	210.16	100.72	145.37
107485720	XM_016106258.2	204.62	159.84	263.28	252.08	147.1	189.33	152.98	164.05
107609208	XM_016311081.2	204.59	234.58	185.94	158.12	276.18	214.8	165.45	228.31
107612963	BGI_novel_T024534,XM_016314768.2	204.54	118.27	236.24	279.94	90.39	153.55	106.92	109.23
BGI_novel_G002855	BGI_novel_T018748	204.05	187.01	274.96	364.11	185.32	318	461.04	791.76
107481407	XM_016101689.2	203.28	94.84	168.99	321.67	49.27	102.47	46.17	74.86
107617758	BGI_novel_T025990,BGI_novel_T025991,XM_016319608.2	203.03	369.49	309.85	194.16	269.78	223.63	109.47	264.69
107643105	XM_016346673.2	200.99	87.46	87.32	143.43	77.13	137.66	135.04	176.13
107476729	XM_016096598.2,XM_021137162.1	200.93	143.91	286.35	239.93	126.42	152.89	129.54	125.75
107619811	XM_016322090.2	200.57	114.45	11.79	44.38	67.53	164.36	27.83	73.89
107629762	BGI_novel_T015817,BGI_novel_T015818,XM_021118258.1	200.44	224.41	151.47	183.3	174.27	216.8	111.48	159.53
107619383	XM_016321657.2	200.34	112.38	325.34	272.68	58.63	126.09	95.53	130.41
107486535	XM_016107082.2	200.32	114.41	237.83	269.94	100.73	150.43	98.3	119.71
107631219	XM_016334586.2	200.29	146.73	308	259.35	99.57	129.3	114.66	129.96
107490413	XM_016111194.2	199.93	311.08	298.47	135.72	229.08	180.42	115.93	244.88
107631334	XM_016334750.2	199.03	158.77	289.87	277.72	140.48	178.44	133.53	170.99
107642872	XR_001620708.2,XR_001620709.2	198.85	248.88	181.85	126.84	214.03	167.25	55.67	181.19
107484745	XM_016105285.2	198.76	270.86	423.71	163.91	674.66	456.58	340.72	422.03
107613623	XM_016315713.2	197.94	144.21	238.01	268.56	95.89	196.46	118.63	141.32
107638993	XM_016342396.2	197.8	163.7	103.1	66.64	147.36	193.18	39.97	116.38
107483108	XM_016103719.2	196.89	145.23	304.5	250.77	119.36	155.52	123.98	127.94
107460825	XM_016079236.2	196.7	180.53	271.26	295.15	170.42	161.67	159.8	133.64
107628554	BGI_novel_T012512,XM_016331220.2,XM_016331271.2	196.5	293.08	197.29	197.29	269.71	281.31	132.37	309.83
107468151	XM_016087396.2	195.9	129.38	260.57	259.3	114.35	157.48	126.5	134.14
107613986	XM_016316198.2	195.8	150.52	242.28	225.75	124.81	132.38	111.99	142.51
107622815	XM_016324858.2	195.52	126.83	240.32	243.21	127.17	156.02	141.22	147.28
107608718	XM_016310427.2,XM_016310428.2	195.37	133.84	189.08	218.93	116.13	151.04	101.14	129.03
107462433	XM_016081017.2	195.26	260.21	335.37	162.56	272.41	209.73	225.17	245.8
107479989	XM_016100112.2	195.06	131.45	272.42	243.56	105.88	135.21	111.25	119.94
107630197	XM_016333270.2	194.96	168.57	196.68	191.03	207.77	201.47	137.15	169.28
107617547	BGI_novel_T025705,XM_021111684.1	193.5	142.66	289.36	215.31	133.86	147.86	125.12	156.83
107617059	XM_016318881.2,XM_016318882.2	193.39	149.56	176.98	223.02	154.31	166.25	129.82	140.2
107482672	XM_016103197.2	193.12	157.75	296.89	227.33	123.74	138.44	136	125.3
BGI_novel_G003221	BGI_novel_T021049	193.01	222.97	75.64	98.76	168.44	210.96	41.56	98.96
107608709	XM_016310415.2	192.98	134.19	167.29	169.58	170.89	199.24	154.02	158.5
107622904	XM_016324977.2	192.88	121.06	224.38	244.02	105.53	152.71	114.35	122.57
107614326	XM_016316537.2	192.04	127.11	257.37	238.32	121.01	147.99	117.75	123.68
107623098	XM_016325245.2	191.57	261.9	266.96	190.51	220.49	212.07	250.22	232.94
107466013	XM_016084990.2	191.55	121.95	355.35	329.13	49.79	87.28	65.86	93.31
107463291	XM_016082068.2	191.21	168.74	174.67	173.93	170.73	193.9	139.58	168.08
107496966	XM_016118301.2	191.12	152.6	274.69	232.05	144.25	170.75	134.83	154.22
BGI_novel_G000777	BGI_novel_T005204	190.97	114.9	145.75	245.89	200.98	243.55	449.08	289.93
107631085	XM_016334411.2,XM_016334412.2,XM_021119405.1,XM_021119406.1	190.51	236.46	259.67	181.56	223.61	196.56	149.18	217.09
107463664	XM_016082511.2	189.9	134.53	266.88	252.31	109.7	149.87	123.61	133.89
107488228	XM_016108940.2	189.14	129.92	314.79	232.16	115.54	154.64	115.36	124.84
107644874	XM_016348822.2	188.88	159.62	270.69	195.05	135.01	147.59	123.49	135.83
107617444	XM_016319201.2	187.37	146.52	277.09	220.83	128.76	142.98	135.36	136.78
107643029	XM_016346564.2	186.85	316.96	137.47	181.17	510.9	372.58	94.71	224.31
107624175	XM_016326652.2	186.64	134	263.94	235.88	119.57	153.55	123.93	136.24
107618028	XM_016319949.2	185.62	216.79	257.25	170.73	216.17	185.52	147.5	194.17
107472977	XM_016092499.2	185.51	117.53	209.84	242.67	116.33	149.4	131.06	132.13
107629008	XM_016331675.1	184.57	118.81	217	284.05	77.38	201.46	75.87	140.89
110268045	XR_002356078.1	184.38	132.35	33.18	28.56	32	66.78	26.47	40.37
107618450	XM_016320529.2	184.18	147.76	258.29	255.19	139	157.74	138.93	135.32
107476957	XM_016096906.2	184.17	339.56	303.68	191.77	65.91	37.82	18.46	48.54
107463552	XM_016082360.2	184.17	242.39	247.49	176.06	192.39	197.45	209.51	209
107631983	XM_016335596.2	183.47	153.92	191.52	189.48	139.64	165.99	99.24	130.68
107643530	XM_016347209.2	183.47	120.52	188.66	530.6	42.47	135.74	48.29	53.27
107468929	XM_016088306.2,XM_021132639.1	183.1	48.48	127.32	221.9	18.72	81.27	23	33.31
107622938	XM_016325018.2	182.68	229.58	174.12	156.83	284.07	253.58	103.03	205.8
107613447	XM_016315446.2,XM_021109202.1	181.77	217.35	244.95	171.32	239.83	212.48	176.75	196.22
107623438	XM_016325692.2	181.11	210.81	233.74	184.9	177.31	141.09	95.49	154.74
107478568	XM_016098702.2	180.53	169.99	209.38	193.69	198.78	205.88	130.19	165.45
107462656	XM_016081279.2	180.53	96.4	205.88	244.62	74.53	127.29	100.17	101.14
107626179	XM_016328996.2	180.5	213.03	207.75	142.14	291.3	251.29	76.1	272.72
107482618	XM_016103142.2	180.26	211.44	250.53	195.54	184.03	173.51	168.82	176.34
107623501	XM_016325795.2	179.68	139.18	277.18	240.81	141.96	154.16	150.24	145.01
107609666	XM_016311675.2	178.59	181.45	103.09	109.72	211.26	211.81	95.74	181.45
107471966	XM_016091525.2	178.49	150.82	252.31	217.83	136.99	155.64	136.69	140
107605537	BGI_novel_T022078,XM_016307441.2	178.31	89.14	206.81	238.33	71.88	121.55	81.74	78.35
107623789	XM_016326163.2	178.03	141.29	318.35	160.03	160.36	159.34	63.76	54.88
107491117	XM_016111881.2	177.76	163.62	244.18	160.23	69.31	74.06	63.98	68.97
107483686	XM_016104288.2	177.49	141.16	169.66	187.24	158.32	181.68	84.97	138.54
107460701	XM_016079085.2,XM_016079086.2	177.33	111.97	183.81	240.86	77.04	113.04	81.55	90.82
107468557	XM_016087891.2,XM_016087970.2,XR_002369504.1	177.27	237.79	220.68	193.48	249.05	248.26	156.77	253.86
107487101	XM_016107692.2	177.12	168.74	273.95	186.1	167.67	156.8	110.93	127.52
107636759	XM_016340249.1	176.9	489.79	320.66	113.42	368.94	208.85	284.87	520.96
107629429	XM_016332222.2	176.87	161.57	190.39	261.4	175.63	204.83	124.61	156.92
107635405	XM_016338877.2	176.46	105.05	170.76	221.09	68.63	177.15	68.47	112.17
107465633	BGI_novel_T001058,XM_016084610.2	175.95	186.1	310.29	242.57	161.04	159.7	139.85	166.47
107461622	XM_016080151.2	175.24	122.97	205.32	237.82	86.2	173.68	89.73	121.25
107636479	XM_016340008.1	175.21	148.55	222.09	199.24	126.78	152.6	113.29	126.79
107638664	XM_016342020.2	174.96	128.73	142.05	115.31	192.11	219.54	115.2	111.99
107616891	XM_016318780.2	174.57	131.11	17.33	35.31	98.53	210.8	43.54	75.18
107461887	XM_016080445.2	174.56	119.67	201.42	257.62	73.87	171.7	65.17	119.01
107618731	XM_016320871.2	174.37	38.55	66.13	335.31	28.01	96.13	153.18	203.56
107481665	XM_016101950.2	174.26	114.82	211.25	191.92	91.97	118	100.97	100.48
107644523	XM_016348394.2	174.12	255.19	335.06	183.9	281.4	227.86	253.04	249.98
107466179	XM_016085170.2	174.02	143.99	59.98	81.59	79.51	152.95	91.68	53.44
107648785	XM_016352603.2	173.48	111.28	228.14	235.61	89.75	133.7	89.8	99.25
107477094	XM_016097061.2,XM_016097068.2	173.38	236.09	166.14	181.65	197.29	220.07	132.61	244.02
107624420	XM_016326914.2	173.09	149.57	28.16	54.02	104.74	195.82	37.8	104.75
107467834	XM_016087042.2	172.64	105.93	230.83	233.26	82.94	128.88	100.81	111.48
107618461	XM_016320547.2	172.41	148.92	178.42	175.55	101.79	157.08	71.49	126.51
107463047	XM_016081762.2,XM_016081770.2	172.38	125.87	259.56	228.04	114.1	154.34	127.49	133.56
107629217	XM_016331939.2	172.32	114.54	235.63	218.95	113.9	142.52	100.09	115.52
107474102	XM_016093692.2,XM_016093697.2,XM_021136319.1	171.98	157.65	114.81	104.67	169.27	201.39	203.18	166.75
107490161	XM_016110933.2,XM_016110934.2	171.53	116.24	253.68	226.74	96.65	132.5	98.14	112.91
107467153	XM_016086190.2	170.64	185.9	238.4	209.7	236.22	197.18	118.08	182.01
107635513	BGI_novel_T018742,XM_016338997.2	170.53	138.55	174.56	178.37	161.39	169.93	211.51	228.22
107480768	XM_016100940.2	170.42	277.43	284.84	114.28	378.52	230.08	137.11	213.38
107476616	XM_016096456.2	170.33	181.77	254.03	189.87	190.57	170.21	150.84	195.37
107605114	XM_016306865.2,XM_021105151.1	169.34	126.67	175.97	182.21	123.49	159.42	120.44	119.16
107618909	XM_016321086.2	167.98	231.7	300.95	146.8	393.13	303.33	283.84	421.92
107476866	XM_016096795.2	167.57	112.65	185.67	220.2	69.33	161.1	65.05	110.44
110273078	XM_021125954.1	167.56	70.48	85.19	105.71	30.17	75.56	82.01	166.23
107493353	XM_016114449.2,XM_016114450.2,XM_016114451.2,XM_016114452.2,XM_016114453.2	167.54	209.03	224.47	165.72	187.55	160.32	173.99	165.95
107629116	XM_016331815.2	167.5	128.73	216.42	139.72	68.64	95.79	65.31	89.26
107617670	XM_016319489.2	166.77	172.02	242.13	212.45	174.6	160.79	92.14	148.97
107467918	XM_016087144.2	166.72	167.59	245.37	194.53	146.6	165.29	135.79	158.18
107612837	XM_016314592.2	166.64	165.78	172.23	204.29	112.19	112.91	76.07	132.86
107630005	XM_016332997.2	165.62	158.4	168.94	150.16	209.16	215.85	378.75	212.11
107612941	XM_016314733.2	165.03	131.39	176.79	199.12	120.39	142.45	154.84	135.26
107476231	XM_016096006.2	165	98.31	245.5	217.52	82.1	126.77	94.53	96.94
107646007	XM_016350178.2,XM_021103949.1	164.39	75.49	67.76	125.94	43.01	105.17	30.03	83.1
107485416	XM_016105946.2,XM_016105947.2	163.94	92.95	108.46	132.63	77.83	119.67	67.27	88.06
107631200	XM_016334562.2	163.93	236.73	257.57	104.57	384.9	236.71	138.37	223.1
BGI_novel_G002964	BGI_novel_T019689	163.87	226	158.7	204.16	355.57	244.43	259.78	211.35
107466129	XM_016085115.2	163.79	95.02	10.18	33.82	49.56	136.61	21.79	65.33
107470102	XM_016089476.2,XM_021133085.1	163.76	210.13	163.86	171.15	223.04	202.71	214.67	222.72
107631078	XM_016334398.2	163.73	209.06	129.73	214.9	221.07	186.24	2052.53	268.84
107609170	XM_016311024.2	163.41	165.89	145.02	168.13	130.51	85.57	923.77	238.29
107605132	BGI_novel_T021964,BGI_novel_T021965,BGI_novel_T021966,XM_021105133.1,XM_021105134.1,XM_021105135.1,XM_021105136.1,XM_021105137.1,XM_021105138.1,XM_021105139.1,XM_021105140.1	163.22	161.7	96.48	92.82	130.02	133.92	118.23	128.69
107475523	XM_016095175.2	162.87	127.22	223.53	198.47	105.67	118.42	105.55	114.71
107634982	XM_016338325.2	162.4	117.55	193.23	179	117.57	142.31	113.39	120.46
107619221	XM_016321469.2	161.77	115.49	248.01	209.69	89.1	117.5	100.18	100.16
107458448	XM_016076653.2	161.34	99.61	186.03	199.76	75.2	151.03	69.6	115.5
107644399	XM_016348242.2	161.22	149.08	196.26	170.88	146.21	154.49	110.64	140.15
107641159	XM_021102819.1,XR_002347244.1	161.18	100.14	157.26	182.46	92.79	132.17	89.55	101.1
107629355	XM_016332132.1	160.87	150.19	56.88	73.84	95.53	168.71	50.7	87.6
107645665	XM_016349737.2,XM_021103886.1,XM_021103887.1	160.79	60.77	82.44	98.05	20.92	52.84	104.35	41.4
107631550	XM_016335032.2,XM_021119910.1	160.78	152.83	65.3	56.4	130.76	154.44	43.99	74.28
107491364	XM_016112212.2,XM_021143369.1	160.43	185.32	222.17	169.44	207.53	205.16	171.95	205.03
107488050	XM_016108747.2,XM_016108748.2	160.25	205.37	207.7	152.07	213.9	180.99	163.4	208.69
107624788	XM_016327282.2,XM_021113271.1	160.2	123.37	241.27	189.64	108.41	128.64	107.3	106.85
107626238	XM_016329074.2	160.08	234.17	122.24	146.17	283.62	279.3	44.74	145.06
107467342	BGI_novel_T011210,XM_016086403.2,XM_016086404.2	159.85	120.42	156.54	100.16	94.47	96.94	60.27	100.48
107469384	XM_016088764.2	159.8	43.15	83.59	312.49	19.95	64.34	75.4	82.48
107631325	XM_016334736.2	159.38	137.98	172.95	172.9	156	162.37	174.57	156.44
107642701	XM_016346146.2	159.38	103.62	220.24	229.05	97.11	143.04	107.67	107.43
107642014	XM_016345355.2	159.29	269.81	160.83	140.04	365.82	264.97	214.38	411.12
107630682	XM_016333886.2	159.12	201.56	100.55	146.89	185.22	189.53	761.6	250.86
107645742	XM_016349829.2	158.93	138.16	73.28	135.66	55.01	97.3	0	58.18
107476314	XM_021136198.1	158.45	89.27	214.36	206.36	60.68	97.22	73.16	80.18
107608818	XM_016310553.2	158.45	207.68	163.12	122.49	160.23	146.77	92.14	176.92
107482295	XM_016102742.2	158.35	149.45	194.07	237.11	149.9	184.05	106.51	150.51
107628832	XM_016331438.2	158.28	176.73	239.9	186.41	185.27	165.92	161.32	183.65
107490289	XM_016111050.2	158.23	141.72	166.21	147.36	133.2	140.6	100.53	125.21
107638693	XM_016342051.2	158.15	154.53	167.96	78.06	112.58	79.37	319.46	120.8
107645433	XM_016349456.2	158.02	277.4	227.72	179.15	231.37	133.24	395.45	171.63
107643312	XM_016346926.2	157.94	121.15	247.11	188.24	89.01	112.32	89.18	102.01
107496023	XM_016117227.2	157.87	77.52	125.14	220.47	80.75	109.58	67.06	68.26
107457693	XM_016075862.2	157.76	116.44	225.15	200.02	93.41	116.12	100.86	110.25
107496550	XM_021127190.1	157.75	125.1	179.65	160.26	95.51	116.52	82	109.33
107644662	XM_016348573.2	157.63	97.62	122.93	141.81	112.09	106.13	73.97	81.29
107463764	XM_016082626.2	157.62	192.07	197.59	146.68	147.61	127.5	89.28	167.59
107487434	XM_016108077.2	157.25	293.06	248.72	101.89	96	80.79	66.22	115.12
BGI_novel_G000184	BGI_novel_T001004	157.04	125.29	120.57	207.09	142.54	156.41	129.56	118.24
107605618	XM_016307554.2	156.92	400.11	226.61	102.57	187.1	135.23	44.29	251.81
107459803	XM_016078070.2,XM_021128210.1	156.8	181.09	190.68	148.25	203.36	190.56	155.33	174.4
107609437	BGI_novel_T022345,XM_016311418.2	156.76	125.49	193.43	175.57	106.03	121.56	88.4	113.01
107626258	XM_016329096.2	156.65	200.17	154.69	104.73	234	184.7	154.71	303.58
107630366	XM_016333472.2,XM_021118797.1	156.38	68.85	25.7	201.72	22.22	100.87	20.93	42.27
107486094	XM_016106642.2	155.52	85.66	174.53	225.46	71.43	115.88	105.11	77.46
107631982	XM_016335595.2	155.32	141.58	185.11	157.31	72.76	77.13	57.35	71.38
107460456	XM_016078819.2	154.86	110.78	9.6	42.88	62.11	140.28	32.11	66.01
107613452	BGI_novel_T009883,XM_016315455.2	154.72	105.96	138.5	150.85	98.29	138.11	86.24	103.19
107622608	XM_016324571.2	154.63	116	233.7	188.36	98.91	123.9	88.13	113.81
107623413	XM_016325661.2,XM_021113028.1	154.62	166.45	233.59	193.3	119.46	125.24	84.52	110.43
107636700	XM_016340196.2	154.09	140.47	79.56	92.89	59.84	115.6	92.5	53.34
107605018	XM_016306752.2,XM_016306753.2,XM_016306754.2	153.95	182.12	207.9	149.84	195.81	170.57	166.62	197.53
107464664	XM_016083605.2	153.87	119.91	266.11	196.71	91.67	109.23	93.83	96.94
107461614	XM_016080136.2	153.59	97.46	179.4	154.67	75.1	93.01	66.87	74.01
107638798	XM_016342194.2	153.39	115.69	219.6	188.29	101.77	131.39	102.93	103.72
107488252	XM_016108967.2	153.31	122.19	46.26	74.42	72.21	95.11	160.95	151.94
107643645	XM_016347346.2	152.98	165.81	216.96	156.48	169.88	150.47	102.37	123.7
107495551	XM_016116695.2	152.89	87.55	184.78	220.63	73.52	117.93	81.76	84.34
107457966	XM_016076165.2,XM_016076166.2	152.79	97	150.28	184.96	69.96	114.33	68.09	86.89
107474781	XM_016094418.2	152.52	98.49	230.26	200.77	77.86	110.32	86.74	88.19
107609436	XM_016311417.2	152.5	88.29	173.52	179.56	60.21	125.09	59.02	91.2
107638790	XM_016342185.2	152.5	180.55	224.6	134.56	192.79	156.11	156.36	179.44
107648790	XM_016352607.2	152.22	91.81	133.11	216.55	78.98	134.64	73.68	85.66
107618594	XM_016320703.2	151.76	103.98	283.64	212.28	125.69	122.44	131.64	166.33
107648384	XM_016352269.2	151.54	88.23	146.81	257.18	94.2	144.24	74.08	77.39
107628932	BGI_novel_T015624,BGI_novel_T015625,XM_016331574.2	151.3	101.66	94.04	50.38	58.76	76.92	21.5	54.08
107604822	BGI_novel_T021660,BGI_novel_T021661,XM_016306521.2	151.25	99.54	203.12	206.31	87.66	124.97	95.82	98.97
107631609	XM_016335098.2	151.07	111.94	190.54	191.47	90.97	114.39	87.22	100.23
107493419	XM_016114521.1	151.03	112.46	186.07	184.14	104.85	129.69	93.91	107.22
107638683	XM_016342041.2,XM_016342050.2	150.61	432.38	402.23	129.15	767.05	329.69	342.41	825.55
107613451	XM_016315454.2	150.59	130.82	150.99	145.62	128.82	143.99	104.88	122.62
107605585	XM_016307499.2,XM_021105288.1	150.55	85.72	184.17	187.04	76.87	97.26	79.91	78.97
107485314	XM_016105829.2	150.54	272.7	127.43	206.24	178.79	174.06	112.4	237.42
107495579	XM_016116728.2	150.28	280.28	117.11	109.73	110.15	128.07	16.09	69.04
107625526	XM_016328172.2	150.27	98.06	215.48	186.35	80.3	113.45	83.72	91.73
107625233	XM_016327813.2	149.99	94.44	172.71	185.37	84.76	120.78	96.69	93.93
107496943	XM_016118263.2	149.71	273.68	272.9	81.34	79.94	69.3	19.01	139.86
107612657	XM_016314354.2,XM_021109529.1	149.48	113.31	151.41	170.92	101.98	125.11	86.32	108.7
107617452	XM_016319211.2	147.87	120.31	199.68	171.94	113.27	113.96	97.89	115.44
BGI_novel_G003498	BGI_novel_T022869	147.71	150.66	155.36	105.89	84.43	102.08	93.46	107.17
107617753	XM_016319603.2	147.16	159.3	125.67	132.61	142.94	155.39	96.01	129.18
107494788	XM_016115824.2,XM_016115825.2,XM_016115826.2,XM_016115827.2	147.14	166.64	198.87	138.99	175.25	161.55	163.79	181.23
107639705	XM_021121426.1,XM_021121427.1	147.02	90.23	104.37	120.18	47.63	58.22	22.39	37.26
107464968	XM_016083930.2	146.93	72.4	101.15	198.34	76.84	83.95	18.81	40.61
107460035	XM_016078356.2	146.41	127.76	109.25	105.2	112.86	148.14	99.35	98.02
107495959	BGI_novel_T007889,XM_016117155.1	146.37	92.09	156.28	161.34	94.29	112.83	101.11	102.61
107643987	BGI_novel_T019947,BGI_novel_T019948,XM_016347750.2,XM_021124389.1,XM_021124391.1,XR_002363496.1	146.24	143.7	98.34	104.9	156.52	162.1	135.18	161.89
107627586	XM_016330418.2	146.02	77.09	124.09	259.15	41.81	83.11	44.85	60.85
107642739	XM_016346199.1,XM_016346200.1,XM_021122941.1,XM_021122942.1	145.81	96.32	115.29	61.63	76.74	95.38	48.21	62.78
107648698	BGI_novel_T021302,XM_016352514.2,XM_016352515.2,XM_016352516.2,XM_016352518.2,XM_016352519.2,XM_021104349.1	145.75	172.5	189.01	145.49	162.16	142.78	148.08	145.74
107625952	XM_016328698.2	145.38	115.86	230.49	184.74	100.92	119.85	103.69	121.83
107643971	XM_016347732.2,XM_021124379.1	144.5	95.38	215.56	199.86	82.12	110.32	89.18	87.02
107641653	XM_016345135.2	144.49	230.59	250.01	114.84	398.75	271.79	247.71	351.36
107462617	XM_016081238.2	144.43	146.99	103.14	45.57	33.92	55.21	10.38	49.72
107623043	XM_016325174.2,XM_021113650.1	144.01	148.28	111.38	110.07	120.04	156.28	81.44	112.01
107609145	XM_016310992.2	143.63	100.88	151.18	152.14	82.21	134.54	52.74	98.92
107481330	XM_016101610.2	143.39	119.81	159.35	147.57	147.29	155.31	175.89	128.73
107622431	XM_016324311.2	143.3	135.87	177.66	156.31	147.99	158.77	131.98	155.01
107487453	XM_016108098.2	143.12	150.56	172.47	127.78	132.61	154.76	101.49	145.4
107624671	XM_016327126.2	142.93	174.98	201.62	143.45	135.33	130.6	38.6	161.52
107618757	XM_016320901.2	142.41	75.27	69.87	105.68	32.61	74.26	45.86	61.55
107613904	XM_016316094.2	142.25	39.71	53.08	52.79	35.59	45.15	80.33	56.07
107643514	XM_016347189.2	142.01	100.88	192.05	182.73	82.7	100.14	85.83	89.96
107646125	XM_016350316.2	142	98.25	175.74	169.96	97.9	118.38	100.37	99.13
107606375	XM_016308440.2	141.98	179.66	184.08	115.48	164.29	167.8	44.61	88.31
107461466	XM_016079964.2	141.96	115.06	150.96	154.52	90.47	124.18	91.31	117.6
107617696	XM_016319529.2	141.75	198.5	189.07	128.12	132.84	112.4	99.93	164.31
107641711	XM_016345180.2	141.74	96.49	237.18	183.43	79.79	114.15	79.71	90.66
107630154	XM_016333216.2	141.73	143.92	259.19	173.51	129.81	120.5	127.5	130.38
107478388	BGI_novel_T002862,XM_016098525.2,XM_016098526.2,XM_021138040.1	141.4	77.06	165	195.27	56.81	100.03	56.81	68.38
107622921	XM_016325002.2	141.35	144.47	149.88	137.29	177.78	170.38	148.05	144.42
107460231	XM_016078576.2,XM_021128532.1	141.19	184.73	209.01	160.81	187.22	150.18	110.52	161.44
107625917	XM_016328648.2	140.9	52.82	19.53	120.05	60.06	134.94	41.19	51.99
107625871	XM_016328605.2	140.47	96.29	202.99	203.44	87.63	115.12	86.35	95.4
107495956	XR_001593556.1	140.3	167.52	117.79	112.45	183.45	159	110.31	157.86
107612740	XM_016314460.2	139.94	185.13	255.39	96.18	173.38	158.69	19.89	136.95
107606197	XM_016308204.1,XM_016308205.2	139.79	133.21	147.74	135.49	123.16	123.11	73.02	94.9
107461609	XM_016080132.2	139.28	90.32	174.46	168.5	81.01	101.84	70.43	88.39
107645824	XM_016349947.2	139.14	103.47	177.65	188.71	86.63	117.59	86.22	100.2
107622677	XR_001616250.2	139.03	284.35	149.07	78.91	204.41	187.92	66.52	148.51
107460377	XM_016078731.2,XM_016078732.2	138.85	134.79	167.13	114.77	139.52	139.31	95.1	123.24
107620338	XM_021114520.1	138.83	38.64	64.49	262.55	5.86	21.76	29.08	32
107617474	XM_016319236.2,XM_016319237.2	138.25	117.4	131.86	156.01	128	141.25	93.75	111.68
107613682	XM_016315786.2	138.12	166.52	113.66	59.05	42.02	56.45	10.31	59.01
107630483	BGI_novel_T016314,XM_016333628.2	137.87	96.45	154.59	163.01	90.59	121.5	89.51	94.83
107480788	XM_016100961.2	137.79	101.19	223.25	191.61	89.2	115.67	101.53	107.73
107479364	XM_016099509.2	137.72	179.11	93.08	132.09	161.86	162.92	720.4	218.69
107460146	XM_016078474.2	137.33	241.89	180.37	98.36	346.02	258.08	156.4	335.75
107642666	BGI_novel_T018985,XM_016346088.2	137.3	94.03	161	224.01	55.21	89.37	41.41	53.66
107635686	XM_016339232.2,XM_021122266.1	137.11	111.82	97.74	90.12	110.14	121.93	48.7	121.56
107643762	XM_016347495.2,XM_021124191.1	137.07	100.47	92.52	145.82	84.79	114.71	126.47	92.61
107639203	XM_016342665.2	136.76	125.01	79.99	116.26	154.54	172.32	82.32	133.97
107643278	XM_016346872.2	136.52	242.82	182.41	104.08	125.17	99.8	29.63	93.09
107482502	XM_021139647.1	136.35	189.75	103.1	116.38	167.14	170.92	88.28	154.41
107487183	BGI_novel_T005266,BGI_novel_T005267,BGI_novel_T005268,XM_016107791.2,XM_021141904.1,XM_021141905.1,XM_021141906.1	136.31	158.32	124.82	104.36	103.67	128.76	124.23	79.91
107458922	XM_016077136.2	136.26	140.38	183.6	137.71	174.46	146.11	119.24	133.68
107494639	XM_016115678.2	136.17	101.18	169.18	168.16	86.13	106.53	101.31	96.69
107471976	XM_016091540.2	135.91	114.54	210.37	180.56	101.35	118.94	114.94	106.4
107642943	XM_016346456.2,XM_016346457.2	135.65	160.76	176.05	124.47	159.51	150.19	129.21	165.1
107631202	XM_016334571.2	135.64	114.7	64.3	121.91	287.1	271.84	98.71	185.04
107640197	XM_016343751.2	135.24	174.35	120.75	130.71	192.56	150.47	1095.37	295.61
107609373	XM_016311318.2	135.2	78.12	122.86	214.41	74.93	109.85	55.04	67.53
107472881	XM_016092410.2	135.16	109.46	11.73	27.61	91.39	173.43	26.02	59.34
107631985	XM_016335598.2	135.11	132.02	185.72	123.12	133.63	133.34	111.51	130.66
107479418	XM_016099555.2	135.06	103.45	96.67	133.66	130.73	147.48	90.59	101.25
107638524	XM_016341843.2	134.96	92.08	163.33	183.62	73.54	87.97	81	56.31
107613319	XM_016315266.2	134.86	98.82	172.37	151	73.93	98.09	64.78	77.26
107623791	XM_016326165.2	134.66	188.71	103.83	136.03	185.18	150.3	498.25	264.74
107628862	XM_016331478.2	134.56	128.48	145.57	121.12	131.18	117.24	58.35	103.32
107644568	XM_016348456.2	134.29	82.48	157.69	207.92	62.75	97.01	45.71	60.36
107464438	XM_016083351.2	134.25	97.78	171.48	154.28	81.81	92.71	73.82	87.69
107631687	XM_016335209.2,XM_021119825.1	134.2	208.36	248.51	163.54	254.85	189.9	71.09	166.89
107605337	XM_016307226.2	133.98	147.97	44.35	71.93	121.78	101	33.88	107.72
107459029	XM_016077253.2	133.87	165.72	123.54	136.29	138.51	100.96	659.02	202
107483451	XM_016104067.2	133.85	127.91	97.14	57.38	120.67	132.84	33.56	116.46
107459829	BGI_novel_T008815,XM_016078107.2	133.56	104.38	185.2	174.18	95.84	119.83	84.99	97.45
107475453	XM_016095089.2	133.25	86.66	194.67	198.87	80.58	108.77	79.47	83.49
107490312	XM_016111089.2	133.13	116.46	178.43	158.63	103.7	123.95	98.78	111.51
107613523	XM_016315566.2	133.05	171.12	129.95	145.66	226.79	184.48	323.53	253.7
107645414	XM_016349428.2	132.97	108.86	179.53	150.74	78.84	89.61	91.48	101.42
107486450	BGI_novel_T005190,BGI_novel_T005191,XM_016106987.2	132.83	122.71	118.24	162.24	61.22	77.2	52.48	59.84
107461682	XM_016080231.2	132.82	179.73	116.47	121.84	195.58	164.2	735.63	261.94
107648626	XM_016352425.2	132.53	128.69	158.6	119.2	90.87	130.56	391.4	163.28
107624886	XM_016327361.2	132.48	90.77	159.87	161.14	70.7	87.53	65.08	78.62
107635868	XM_016339446.2,XM_016339503.2	131.99	122.37	107.68	93.84	140.88	159.39	161.6	127.27
107609891	XM_016311946.2,XR_001613307.2	131.6	64.88	111.37	168.11	73.72	112.75	69.76	83.69
107635654	BGI_novel_T018816,BGI_novel_T018817,BGI_novel_T018818,XM_016339193.2,XM_021122243.1,XM_021122244.1,XM_021122245.1,XM_021122246.1,XM_021122247.1	131.59	89.24	19.83	38.92	47.56	85.1	42.55	82.03
107619415	XM_016321700.2	131.51	132.65	104.57	132.96	103.97	116.44	111.92	112.15
107631188	XM_016334546.2	131.43	105.15	163.45	160.69	52.45	125.29	51.18	90.54
107630591	XM_016333785.2	131.41	101.15	92.84	133.72	115.76	132.87	81.85	99.89
107460791	XM_016079191.2	131.16	172.92	123.98	133.87	218.71	156.79	66.21	175.77
107629003	XM_016331672.2	131.06	105.03	227.71	166.99	95.28	114.91	96.12	103.47
110281450	BGI_novel_T005479,BGI_novel_T005480,XM_021143715.1	130.93	173.33	142.55	87.73	154.33	113.55	37.62	128.56
107617318	XM_016319057.1	130.58	106.05	167.94	131.82	58.89	97.3	53.15	106.12
107629897	XM_016332840.2	130.56	93.2	150.41	161.01	66.74	95.21	63.17	72.98
107463671	XM_016082520.2	130.25	98.61	33.78	41.79	146.35	123.35	106.66	133.4
107617822	XM_016319693.2	130.01	126.93	87.84	106.58	155.57	144.87	89.53	133.49
107482132	XM_021139523.1	129.72	131.41	157.08	135.95	117.32	118.15	96.14	105.69
107628277	XM_016331029.2	129.72	102.46	152.91	155.02	91.98	120.06	87.91	96.35
107644263	XM_016348084.2	129.58	206.3	278.52	119.48	264.51	218.04	120.3	179.37
107629539	XM_016332359.2	129.58	246.04	116.15	182.66	167.26	156.61	73.08	209.59
107613608	XM_016315693.2	128.82	99.11	196.78	168.4	75.75	94.5	70.41	83.52
107493096	XM_016114170.2	128.74	160.39	137.57	117.92	142.57	157.6	94.21	147.74
107612414	XM_016314428.2	128.62	134.82	160.79	92.08	79.65	79.48	32.27	77.28
107617941	XM_016319834.2	128.34	101.69	143.44	143.96	93.62	116.14	83.94	93.69
107617412	XM_016319169.2	128	89.63	131.07	172.17	85.67	109.86	67.54	83.09
107459741	XM_016077990.2	127.83	181.93	154.34	135.96	176.09	169.72	163.57	205.8
107619060	XM_016321266.2	127.72	80.6	199.21	172.4	66.51	87.88	70.95	84.4
107629123	XM_016331825.2	127.71	77.5	141.27	171.99	44.1	118.54	46.56	80.21
110273949	XM_021127489.1	127.38	117.59	186.71	164.89	96.68	147.08	62.4	116.86
107644846	XM_016348783.2	127.22	96.13	141.79	154.67	93.05	127.94	67.71	91.94
107630760	XM_016333985.2,XM_021119145.1	127.17	76.7	156.45	140.46	80.89	92.06	83.05	78.51
107477662	XM_016097716.2	127.04	135.35	162.27	125.37	119.82	119.97	98.13	112.45
107459875	XM_016078176.2	126.96	34.77	71.97	62.71	18.16	34.25	109.36	85.02
107495864	XM_016117072.2	126.74	63.53	149.44	186.93	58.25	92.57	64.9	58.83
107478877	XM_016099029.2	126.63	129.09	57.29	54.86	106.89	155.64	46.32	98.22
107639288	XM_021121143.1	126.58	66.6	66.07	179.36	49.81	94.18	44.77	86.5
107482485	XM_021139659.1	126.56	145.57	204.43	91.91	196.92	159.41	116.16	116.77
107624752	XM_016327199.2	126.55	110.47	170.26	141.31	83.86	86.82	81.62	101.26
107618019	XM_016319942.2	126.16	94.87	134.41	153.01	84.8	101.63	78.73	99.58
107488220	XM_016108929.2	126.05	208.9	107.46	121.16	342.88	260.62	62.03	172.46
107627973	XM_016330782.2	126.03	130.83	99.49	51.58	150.73	140.65	12.59	194.61
107478819	XM_016098954.2	126	66.59	18.88	138.86	26.09	83.36	26.7	45.19
107485760	XM_016106295.2	125.76	45.42	108.74	273.7	118.73	282.86	143.15	167.7
107472712	XM_016092224.2,XM_016092225.2	125.65	152.84	182.2	116.09	150.81	135.17	121.32	147.78
107624155	XM_016326622.2	125.48	96.05	90.72	226.34	124.48	158.87	54.85	142.59
107613029	XM_016314857.2,XM_016314858.2,XM_016314861.2,XM_016314862.2	125.41	162.72	166.39	106.96	164.44	137.71	74.95	141.04
107488825	XM_016109604.2	125.24	81.95	179.86	172.72	62.64	94.76	71.24	74.24
107481632	XM_016101907.2	125.18	90.35	187.86	164.44	95.61	118.69	100.18	102.9
107480494	XM_016100640.2	125.17	163.73	107.66	169.77	163.38	127.16	2027.1	205.57
107645435	XM_016349458.2	125.11	95.24	182.98	160.5	74.61	96.03	74.26	82.22
107631527	XM_016334993.2	124.87	91.34	173.27	159.06	72.31	91.24	70.22	81.33
107481435	XM_016101711.2	124.46	96.47	199.61	175.9	76.48	101.2	77.25	91.08
107630359	XM_016333462.2	124.33	158.38	102.74	117.68	186.05	161.46	442.62	235.11
107486635	XM_016107194.2	123.67	76.01	126.5	168.7	47.45	123.19	48.26	86
107642360	XM_016345688.2	123.58	105.79	159.27	166.18	85.1	147.64	70.89	115.87
107484887	XM_016105434.2	123.54	155.88	79.46	51.77	189.41	102.5	161.04	285.98
107612155	XM_016313975.2	123.45	214.89	250.11	124.48	349	255.05	199.33	316.28
107477187	BGI_novel_T002517,XM_016097165.2,XM_016097166.2,XM_016097167.2,XM_021137498.1,XM_021137499.1	123.44	80.4	128.54	135.89	63.12	77.72	67.14	67.39
107623790	XM_016326164.2	123.4	90.02	153.79	67.44	18.46	43.78	176.6	128.36
107617745	XM_016319596.2	123.33	150.58	103.27	97.39	126.93	125.15	148.97	132.64
107606319	XM_016308364.2	123.27	123.99	70.33	51.89	124.93	157.86	45.55	101.83
107640047	BGI_novel_T019006,XM_021123559.1	123.07	189.5	253.17	133.97	224.98	175.85	177.66	204.46
107471343	XM_016090787.2,XM_021132523.1	122.93	126.39	177.42	147.53	88.36	96.48	60.34	77.27
107460595	XM_016078975.2,XM_021128711.1	122.78	154.16	163.91	95.37	124.13	108.38	78.61	139.91
BGI_novel_G001204	BGI_novel_T008090	122.74	165.73	141.07	101.32	169.3	148.24	132.41	156.94
107623050	XM_016325182.2	122.62	73.19	77.29	61.74	37.04	49.14	15.06	35.4
107618872	XM_016321046.2	122.54	89.34	152.14	144.55	79.21	96.28	70.74	81.04
107615172	XM_016317296.2	122.38	74.35	132.78	142.7	96.5	122.83	88.71	81.02
107631898	XM_016335480.2	122.37	146.5	151.83	129.71	136.02	127.66	108.97	119.71
107466183	BGI_novel_T010809,XM_016085169.2,XM_016085171.2	122.17	92.09	133.55	165.77	82.19	100.52	64.38	76.81
107467478	XM_016086590.2	122.15	93.69	94.23	120.96	132.72	144.15	103.45	121.36
107464412	XM_016083325.2,XM_016083326.2	122.03	102.72	124.58	141.88	106.64	119.99	88.58	98.72
107629117	XM_016331816.2	121.69	143.61	148.94	102.04	147.9	126.42	112.59	131.77
107476959	XM_016096909.2	121.61	121.55	172.8	148.6	118.41	116.64	104.38	119.63
107618077	XM_016320006.1	121.45	168.24	181.72	145.48	202.02	166.01	124.65	180.34
107622630	XM_016324605.2,XM_016324606.2	121.34	121.56	158.06	106.19	109.4	106.8	83.38	107.61
107487481	XM_016108128.2	121.15	179.74	136.9	70.78	165.74	133.98	173.84	177.88
107491066	XM_016111834.2,XM_021143588.1	120.95	63.4	26.68	269.38	63.32	86.87	55.65	43.72
107629221	XM_016331942.2	120.87	94.08	162.16	143.89	95.37	106.31	94.84	90.9
107645953	XM_016350114.2	120.68	93.72	157.97	164.59	87.99	104.1	90.26	82.98
107645471	XM_016349502.2	120.15	114.92	171.35	134.51	99.7	105.31	83.81	101.21
107484068	XM_016104680.2	119.71	103.58	170.17	132.6	166.19	168.43	140.38	149.96
107629140	XM_016331844.2	119.57	69.49	161.51	138.34	60.29	85.57	62.87	77.09
107482960	XM_016103549.2	119.55	92.11	97.22	79.12	125.39	133.89	72.5	72.73
107645294	XM_016349285.1	119.47	155.67	139.57	105.22	137.74	146.97	92.65	129.63
107473198	XM_016092749.2	119.01	182.51	141.31	113.26	207.58	161.78	149.19	165.84
107477749	XM_016097819.2	118.76	48.57	28.51	137.38	49.75	103.34	34.76	58.17
107605538	XM_016307442.2	118.68	75.53	153.2	135.51	72.99	89.63	85.23	81.99
107476881	BGI_novel_T002423,BGI_novel_T002424,XR_001589720.2	118.43	151.23	181.61	130.87	146.18	143.28	59.18	132.75
107609548	XM_016311549.2	118.12	82.06	103.52	85.66	81.8	95.83	20	93.21
107622742	XM_016324755.2,XM_021114283.1	117.97	139.03	127.25	112.05	134.97	118.88	91.31	118.32
107624749	XM_016327194.2	117.88	111.06	125.42	122.66	149.41	132.55	93.4	106.67
107605859	XM_016307787.2,XM_016307788.2	117.44	90.68	115.68	88.42	95.46	95.67	67.59	89.71
107486724	XM_016107290.2	117.4	84.07	189.08	153.86	69.07	91.98	72.8	78.37
107630133	XM_016333188.2	117.23	105.43	151.04	134.41	75.48	106.49	66.09	91.39
110275767	BGI_novel_T011016,XM_021132011.1	117.14	111.29	123.16	119.26	107.59	112.42	100.62	94.02
107459563	XM_016077790.2	117.02	111.86	133.37	133.99	70.97	71.67	64.52	65.37
107482294	XM_016102741.2	116.96	101.9	124	172.92	117.09	138.18	81.76	106.1
107623617	XM_016325948.2	116.92	183.23	160.41	132.71	106.28	127.64	93.26	131.78
107622741	XM_016324754.2	116.91	124.26	121.65	127.01	91.43	84.61	70.3	82.06
107642835	XM_016346321.2	116.83	86.77	69.48	119.47	123.19	164.79	98.17	160.83
107475998	BGI_novel_T002220,BGI_novel_T002221,XM_016095711.2	116.81	104.74	186.53	128.9	116.86	121.38	106.35	113.08
107613503	XM_016315530.2	116.79	72.4	147.01	125.7	55.24	73.97	53.88	58.01
107459247	XM_016077468.2	116.77	60.89	235.67	175.95	18.84	47.64	54.17	70.45
107610041	XM_016312110.2	116.67	123.36	109.12	101.53	159.17	144.72	1017.07	218.02
107488247	XM_016108964.2	116.56	68.42	168.88	166.19	62.14	83.2	69.61	70.12
107606043	XM_016308009.2,XM_016308010.2,XM_021106370.1,XM_021106371.1	116.56	61.3	111.78	144.39	50.18	70.77	52.53	62.81
107635296	BGI_novel_T018650,XM_016338732.2,XM_021121988.1	116.08	74.89	142.71	150.41	62.15	94.33	64.44	67.54
107631824	XM_016335386.2	115.95	85.33	92.63	150.64	52.6	86.3	260.08	157.37
107623447	XM_016325708.2	115.72	79.56	123.87	144.24	73.92	98.87	73.03	79.21
107466138	BGI_novel_T010788,BGI_novel_T010789,XM_016085122.2	115.68	219.08	186.99	120.61	167.13	138.85	58.11	140.65
107461206	BGI_novel_T009308,XM_016079680.2	115.45	130.92	56.02	46.6	107.17	139.17	51.19	87.95
107645930	XM_016350086.2	115.45	100.8	192.48	145.63	88.04	95.02	76.25	96.05
107631493	XM_016334953.2	115.42	74.78	180.25	142.11	83.06	100.03	84.64	84.88
107625436	BGI_novel_T014696,XM_016328069.2	115.33	96.36	142.91	105.71	87.52	91.17	78.73	86.25
107617385	XM_016319144.2	115.04	79.26	157.29	135.78	71.58	94.25	78.14	77.51
107467850	XM_016087064.2	114.97	73.49	157.77	156.93	72.76	97.73	79.87	75.82
107464437	XM_016083349.2	114.71	85.7	127.93	125.31	83.27	98.27	74.4	81.88
107473997	XM_016093585.2	114.63	92.25	145.55	117.82	60.7	104.04	39.44	77.23
107617849	XM_016319718.2	114.59	97.28	78.45	161.03	71.16	91.47	34.21	53.5
107623854	XM_016326248.2	114.56	160.38	157.37	96.88	184	141.65	112.18	156.23
107609443	XM_016311426.2	114.42	57.53	242.95	204.83	55.59	140.1	110.3	137.72
107473452	XM_016093011.2	114.37	77.74	171.16	169.66	77.18	100.42	85.94	80.05
107638364	XM_016341603.2	114.34	87.39	182.73	165.59	69.97	86	63.44	81.91
107467418	XM_016086511.1	114.24	127.53	146.71	145.22	168.69	166.51	100.37	150.29
107629023	XM_016331700.2,XM_021117891.1	114.22	79.45	164.79	149.7	73.41	87.67	74.75	80.77
107635465	XM_016338940.2	114.16	104.61	107.62	134.62	90.8	91.38	58.05	90.2
107639073	XM_016342489.2	113.72	90.37	102.92	119.98	111.75	121.85	52.47	93.16
110273529	XM_021126677.1	113.63	159.29	125.1	130.68	242.93	163.37	199.45	156.25
107623441	XM_016325701.2,XM_016325702.2	113.58	75.13	153.28	144.07	67.17	85.29	71.97	71.61
107617257	XM_016319000.2	113.46	86.77	157.34	141.42	67.11	86.11	59.44	75.81
107472972	XM_016092494.2	113.45	107.55	121.56	110.67	129.43	122.63	113.64	117.88
107625019	XM_016327536.2	113.3	73.06	141.27	143.04	64.41	86.9	69.93	74.62
107469787	XM_016089166.2	113.25	7.95	82.88	38.28	0.37	3.65	0.14	0.24
107638063	XM_016341247.2	113.2	202.54	141.7	118.4	139.21	121.14	143.12	159.87
107462430	XM_016081012.2	113.08	107.93	126.58	122.08	150.14	138.88	92.03	108.82
107637222	BGI_novel_T013544,XM_016340659.2	112.88	80.45	77	146.69	94.42	114.79	273.09	96.3
107629448	XM_016332250.2	112.84	143.89	118.06	98.47	135.59	108.15	53.92	109.18
107496190	XM_016117396.2	112.76	68.01	97.97	184.67	91.84	130.4	120.42	75.94
BGI_novel_G002409	BGI_novel_T015830	112.72	101.26	116.34	103.2	102.5	98.44	69.58	87.45
107464920	XM_016083891.1	112.5	39.94	133.1	282.42	14.45	49.91	27.82	29.2
107606727	BGI_novel_T012628,BGI_novel_T012629,BGI_novel_T012630,BGI_novel_T012632,BGI_novel_T012633,BGI_novel_T012634,BGI_novel_T012635,BGI_novel_T012636,BGI_novel_T012637,BGI_novel_T012638,XM_016308783.2	111.79	89.81	145.24	134.82	84.22	99.72	66.32	86.91
110277222	BGI_novel_T028290,XR_002369802.1	111.75	90.46	80.52	138.18	115.88	106.24	95.86	81.35
107492357	XM_016113376.2,XM_016113377.2,XM_021126363.1	111.63	98.38	116.14	130.81	100.34	104.1	83.1	94.09
107619212	XM_016321454.2	111.53	68.74	147.78	165.81	39.55	97.04	35.04	64.26
107630956	XM_016334254.2,XM_016334255.1	111.46	72.06	67.23	140.5	71.59	88.6	73.45	71.36
107480498	XM_016100649.2,XM_016100650.2,XM_021138910.1,XM_021138911.1	111.3	135.6	151.37	107.12	128.05	114.47	85.9	124.54
107460207	XM_016078544.2	111.21	136.31	81.29	77.54	159.38	152.74	68.86	130.2
107474240	XM_016093840.2,XM_021135296.1	111.12	63.49	63.81	49.56	34.3	42.44	15.28	36.62
107629301	XM_016332058.2	110.79	48.9	110.67	134.59	36.84	61.4	50.8	36.92
107493496	XM_016114588.2	110.49	85.9	96.67	94.58	64.61	113.89	244.92	120.54
107476787	XM_016096687.2	110.26	84.41	137.76	178.93	46.22	119.54	44.63	80.67
107638471	XM_016341770.2	110.08	89.47	149.68	144.27	58.54	110.23	47	81.17
107644008	XM_016347773.2	109.7	134.15	112.67	97.4	157.15	121.04	68.31	104.76
107642845	XM_016346335.2,XM_016346336.2,XM_021122998.1	109.66	108.15	120.92	93.83	128.08	118.1	90.43	106.92
107492610	XM_016113645.2	109.62	99.85	128.02	122.12	96.71	104.45	72.23	88.94
107461485	XM_016079987.2	109.44	76.74	126.11	157.32	0.06	0.11	0	0
107608862	XM_016310613.2,XM_021107094.1,XM_021107095.1,XM_021107096.1,XR_002351047.1	109.4	93.5	98.91	100.26	114.04	111.13	90.63	109.75
107626244	XM_016329082.2	108.98	105.98	134.47	128.33	102.93	112.13	70.77	93.68
107476958	XM_016096907.2	108.89	75.51	161.48	140.77	66.33	90.47	65.86	71.78
107638370	XM_016341608.2,XM_021120305.1	108.87	133.52	69.59	94.81	139.73	144.4	70.65	121.23
107460055	XM_016078381.2	108.83	90.71	143.26	150.44	68.67	125.26	64.44	98.86
107494622	XM_016115664.2	108.7	85.97	154.45	113.5	74.61	78.97	73.41	77.98
107460286	XM_016078643.2	108.67	39.28	30.64	121.02	32.16	69.07	23.11	38.26
107634140	XM_016337716.2	108.61	132.1	209.29	87.38	146.46	99.77	65.71	62.72
107467804	XM_016086999.2	108.55	156.3	144.76	97.49	159.67	127.88	132.96	186.92
107604856	XM_016306561.2	108.46	143.49	130.81	97.38	147.2	119.47	104.9	125.72
107606282	XM_016308322.2	108.35	78.27	119.18	106.41	67.72	79.77	61.24	72.28
107469749	XM_016089126.2	108.22	91.82	68.23	100.75	111.73	130.16	111.11	151.28
107618927	XM_016321114.2	108.21	71.75	146.2	157.87	68.71	94.52	75.02	69.02
107488780	BGI_novel_T005765,XM_021142488.1	108.16	102.56	123.62	101.62	94.3	94.72	83.59	94.81
107618749	XM_016320892.2	108.13	54.51	125.7	158.42	57.66	83.66	67.4	63.24
107483810	XM_016104429.2	108.06	102.44	69.42	91.68	116.34	129.98	69.87	106.43
107631911	XM_016335498.2	107.96	27.14	216.72	153.27	18.31	48.65	54.35	64.27
107645431	XM_016349452.2	107.95	67	172.56	143.9	56.83	84.92	68.16	72.5
107489931	XM_016110697.2	107.87	186.89	166.54	82.38	151.23	131.94	76.49	132.75
107642919	XM_016346428.2	107.78	104.46	154.15	81.07	126.23	119.73	232.5	121.91
107467710	XM_016086877.2	107.73	76.89	161.34	147.49	65.97	93.1	70.14	74.46
107492543	BGI_novel_T006941,BGI_novel_T006942,XM_016113586.1	107.39	68.78	149.13	136.77	56.55	76.66	61.19	67.62
107613477	XM_016315486.2	107.39	176.94	72.68	136.08	123.99	107.65	797.38	200.34
107468023	XM_016087272.2,XM_021129049.1	107.35	99.3	58.74	97.02	141.42	207.88	42.92	132.4
107489312	XM_016110069.2	107.31	64.82	141.26	148.68	56.48	80.31	60.42	64.28
107630130	XM_016333183.2	107.31	101.93	145.76	123.23	75.02	107.25	46.68	97.32
107630743	XM_016333963.2	107.27	132.81	118.24	87.04	151.7	139.81	112.49	121.64
107618113	XM_016320053.2	107.19	103.12	171.36	138.38	62.41	84.25	67.84	52.19
107643711	XM_016347429.2	107.18	83.09	104.65	120.64	83.86	91.65	62.7	78.1
107469727	XM_016089108.2	107.08	132.11	93.68	88.03	174.56	155.57	58.82	120.84
107605985	XM_016307945.2,XM_021106332.1	107.07	135.09	149.2	89.13	119.2	91.02	77.98	133.04
107639756	XM_016343349.2,XM_016343350.2	106.95	54.82	64.89	95.36	61.34	91.53	49.19	59
107628834	XM_016331439.2	106.77	88.79	119.77	159.88	69.21	89.96	359.88	92.04
107488034	XM_016108727.2	106.72	160.34	79.03	99.48	135.58	137.1	58.47	148.63
107626205	XM_016329028.2	106.65	66.43	129.15	121.03	71.05	83.65	72.49	73.17
107637284	XM_016340715.1	106.64	278.16	197.85	77.77	330.27	150.32	160.06	225.5
107630882	XM_016334159.2	106.64	66.07	106.01	149.66	86.14	115.97	98.29	88.04
107622778	XM_016324809.2	106.62	100.83	75.04	101.66	114.03	126.89	121.46	169.66
107465116	XM_016084106.2	106.48	120	86.96	91.97	105.02	112.46	97.15	102.31
107467379	XM_016086460.1	106.48	125.05	76.98	81.88	120.51	122.9	126.07	116.45
107635148	XM_016338525.2	106.38	124.99	122.56	110.88	141.85	110.6	117.95	132.99
107470046	XM_016089426.2	106.37	99.56	150.09	124.73	85.71	81.34	93	87.14
107635258	XM_016338676.2	106.13	77.29	118.49	108.26	65.17	79.42	61.4	70.1
107613626	XM_016315718.2	105.89	110.32	130.78	90.17	106.76	110.85	66.74	97.1
107495812	XM_016117008.1	105.84	41.69	209.12	132.5	30.24	61.11	22.92	41.84
107480622	XM_016100775.2	105.48	147.94	78.62	114.15	220.94	221.52	34.56	124
BGI_novel_G001899	BGI_novel_T012588	105.47	81.88	177.55	118.18	71.43	92.93	73.16	72.02
107491403	XM_016112251.2	105.42	69.51	149.85	160.22	65.38	87.59	73.55	71.79
107487775	XM_016108471.2	105.39	158.64	166.62	85.37	188.94	149.05	132.61	263.58
107492725	XM_016113783.2,XM_021126467.1	105.31	133.48	146.18	87.54	126.41	109.36	80.21	109.71
107623849	XM_016326243.2	105.26	95.76	162.02	101.04	85.82	79.53	94.17	97.13
107487884	XM_016108576.2,XM_016108577.2,XM_021142142.1	105.25	107.99	126.63	101.2	133.01	119.08	91.84	114.18
107638675	XM_016342030.2	105.21	116.58	195.74	134.04	120.97	116.79	118.74	140.44
107496767	XM_016118094.2,XM_021143452.1	105.15	95.83	127.14	112.11	90.22	90.72	81.37	89.88
107482454	BGI_novel_T004024,BGI_novel_T004025,BGI_novel_T004026,XM_016102948.2,XM_021139680.1	105.11	111.24	41.02	35.1	123.93	179.87	45.36	88.75
107476207	XM_016095972.2	105.02	174.5	85.1	107.55	190.06	167.69	754.5	253.46
107492478	XM_016113504.2	104.96	170.2	148.1	176.48	282.67	218.31	1113.05	327.81
107644450	XM_016348311.1	104.88	111.87	123.23	98.85	107.77	105.21	65.26	91.11
107631600	XM_016335092.2	104.86	69.97	137.1	141	69.06	74.91	64	62.1
107635143	XM_016338521.2	104.61	111.39	130.4	94.48	101.61	92.55	62.74	98.33
107629247	XM_016331995.2,XR_002358669.1	104.52	72.45	37.65	143.61	186.44	167.38	28.2	93.43
107483722	XM_016104333.2	104.44	60.72	160.9	129.16	58.58	79.62	59.44	70
BGI_novel_G000780	BGI_novel_T005245	104.38	126.02	131.04	68.02	61.9	58.53	14.18	70.79
107471534	XM_016091021.1	104.36	73.48	70.42	161.04	91.54	105.24	48.94	104.76
107629463	XM_016332265.2	104.12	65.16	129.77	135.37	61.51	82.04	69.56	70.43
107613993	XM_016316203.2	104.11	60.46	148.87	150.71	48.15	70.61	50.6	57.8
107605271	XM_016307094.2	104.09	27.04	54.64	51	9.43	27	0.99	5.11
107613819	XM_016315980.2	104.06	77.87	125.25	109.02	70.88	113.42	53.56	64.52
107459632	XM_016077862.2	103.88	123.46	167.36	77.99	229.98	166.11	155.9	231.01
107479991	XM_016100115.2	103.78	108	60.79	79.8	64.45	68.58	818.61	300.17
107468637	XM_016087958.2	103.51	76.5	104.06	115.76	65.82	90.8	61.9	67.91
107458779	BGI_novel_T008568,XM_016076979.2	103.45	73.28	103.58	112.27	85.46	86.83	57.08	71.47
107639029	XM_016342439.2	103.44	187.53	114.62	72.43	119.8	113.39	111.72	134.06
107493127	XM_016114203.2	103.38	91.01	142.45	107.65	71.97	73.53	57.22	65.46
107643311	XM_016346927.2	103.27	85.69	112.32	117.04	86.82	105.03	93.49	90.08
BGI_novel_G004425	BGI_novel_T028400	103.21	85.82	105.18	118.11	85.81	88.98	81.14	68.42
107645642	XM_016349721.2	103.2	179.22	106.87	160.62	192.82	133.78	1546.56	302.93
107476645	XM_016096496.2	103.08	112.2	117.39	80.66	85.7	79.62	37.17	68.93
107644463	XM_016348324.2	103.07	201.19	142.29	77.52	77.24	79.32	11.85	72.34
107605552	XM_016307463.2,XM_016307464.2	102.89	201.77	85.49	88.87	94.48	102.01	16.58	64.48
107624771	XM_016327229.1	102.85	141.86	133.61	101.8	263.41	260.59	149.98	268.61
107461463	XM_016079955.2,XM_016079956.2,XM_021129112.1,XM_021129113.1	102.72	143.45	139.44	86.33	158.54	129.03	87.35	131.49
107609043	XM_016310865.2	102.47	71	92.67	173.19	86.31	114.49	82.35	69.72
107477168	XR_001589739.2	102.41	66.98	134.07	132.56	59.47	82.26	64.01	64.14
107622772	XM_016324794.2	102.22	120.15	161.76	103.85	104.04	81.26	90.06	103.49
107642941	XM_016346452.2,XM_021123054.1	102.11	94.73	109	121.04	80.59	88.24	69.22	82.57
107608755	XM_016310480.2	102.05	69.09	95.35	109.23	62.74	73.46	69.03	73.18
BGI_novel_G004411	BGI_novel_T028374	101.9	86.51	105	107.53	78.45	86.45	72.7	68.65
BGI_novel_G003600	BGI_novel_T023492	101.72	80.79	41	41.08	91.48	113.97	38.06	76.45
107480463	XM_016100604.1	101.66	74.73	93.19	124.57	78.2	87.95	62.36	70.33
107478101	XM_016098228.2	101.64	178.35	58.46	154.45	168.28	140.16	230.95	268.19
BGI_novel_G004013	BGI_novel_T026081	101.59	81.28	81.1	69.32	102.81	119.01	83.88	108.04
BGI_novel_G003822	BGI_novel_T024780	101.56	80.33	115.99	107.84	79.73	90.83	64.43	71.97
107467168	XM_016086209.2	101.52	97.29	78.57	102.64	80.6	89.17	100.64	94.98
107467872	XM_016087090.2	101.48	75.92	120.52	118.31	62.97	81.89	59.54	71.92
107614226	XM_016316451.2	101.27	95.34	121.97	95.06	84.58	83.1	51.22	78.55
107617168	XM_016318946.2	101.27	122.16	117.4	102.88	72.62	64.13	297.64	187.94
107613533	XM_016315573.2	101.26	69.48	117.04	155.51	51.38	131.17	54.67	84.55
107480756	XM_016100922.2	101.08	88.37	125.16	110.15	39.63	94.14	33.3	72.49
107635178	XM_016338565.2,XM_016338566.2	101	80.48	151.58	120.03	67.81	73.09	81.7	89.76
107643898	XM_016347648.2	100.57	68.08	95.72	124.08	56.68	68.26	47.88	60.27
107472101	XM_016091660.2,XM_021134370.1	100.54	79.16	111.6	120.13	18.57	20.8	14.44	14.68
BGI_novel_G000869	BGI_novel_T005815	100.45	133.79	32.39	39.28	82.53	125.97	14.36	30.58
107466304	XM_016085279.2,XM_021130649.1,XM_021130650.1	100.45	86.85	84.8	63.4	97.04	122.48	71.93	95.73
107609590	XM_016311592.2	100.44	97.77	98.92	80.51	111.47	95.61	79.16	101.9
107623094	XM_016325240.2	100.43	130.14	90.73	93.38	82.36	50.04	34.16	60.8
107622321	XM_016324180.2	100.38	92.64	39.04	37.4	113.52	146.2	48.32	70.08
107605646	XM_016307596.2	100.22	120.15	135.02	83.28	81.65	71.36	70.49	77.77
107634968	XM_016338307.2	100.15	66.86	143.68	121.86	50.67	65.48	52.5	56.49
107618804	XM_016320967.2	100.14	96.77	133.4	75.35	92.85	88.83	74.05	98.5
107488794	XM_016109568.2	100.06	66.73	111.47	117.24	69.61	87.01	66.34	69.98
107471203	XM_016090647.2,XM_016090648.2	99.81	72.85	77.17	74.83	66.63	92.23	18.85	55.31
107471082	XM_016090528.2,XM_016090530.2,XM_021134161.1	99.68	131.39	81.5	56.3	98.06	97	77.03	137.93
107630229	XM_016333657.2	99.44	103.16	116.67	98.89	117.24	117.79	80	109.84
107618873	XR_001615403.2	99.41	108.29	153.98	88.28	88.09	102.19	75.16	93.64
107462418	XM_016080996.2	99.34	84.64	125.9	108.32	70.8	73.47	65.17	76.83
107480514	XM_016100665.2	99.17	30.87	103.76	207.88	12.41	45.43	26.4	19.95
107628717	BGI_novel_T015697,BGI_novel_T015698,XM_016331293.2,XM_016331294.2,XM_021118068.1,XM_021118069.1,XM_021118070.1,XM_021118071.1	99.16	65.14	106.97	107.55	48.37	60.63	51.06	52.15
107643062	XM_016346610.2	99.15	81.24	24.15	45.4	64.94	84.11	94.82	117.53
110262507	BGI_novel_T017093,BGI_novel_T017094,XM_021119965.1	98.98	100.21	35.84	30.8	66.52	95.67	26.88	73.67
107479813	XM_016099912.2	98.91	104.83	93.11	79.22	130.39	125.76	102.14	115.62
107629953	XM_016332921.2	98.73	39.98	26.86	138.2	40.89	98.87	25.1	47.55
107471182	XM_016090621.2	98.63	100.07	103.58	108.37	76.17	69.46	57.58	68.74
107610191	XM_016312292.2,XM_021106224.1	98.35	84.24	39.09	64.51	88.53	105.07	108.18	96.51
107474233	BGI_novel_T001639,XM_016093833.2	98.23	88.46	144.53	115.66	81.29	83.8	79.87	86.03
107465607	XM_016084585.2,XM_016084586.2	98.2	100.93	90.45	83.15	104.04	108.88	68.52	102.41
107635385	XM_016338857.2	97.7	66.84	73.41	158.66	78.45	88.98	241.57	74.14
107644737	XM_016348663.2	97.7	92.87	135.01	104.63	88.7	79.63	73.39	87.71
107638438	XM_016341701.2,XM_016341702.2	97.68	121.59	101.43	99.2	149.97	88.38	146.25	136.21
107631733	XM_016335273.2	97.67	89.67	85.61	95.12	82.77	91.91	64.93	84.76
107613108	XM_016314964.2	97.59	66.2	118.14	120.42	72.17	79.38	70.31	73.15
107606603	XM_021107319.1	97.47	96.89	100.36	89.94	71.76	70.83	77.41	72.34
107459832	XM_016078120.2	97.25	171.45	113.28	100.36	126.24	89.44	91.61	139.36
107628152	XM_016330948.2	96.62	124.42	118.47	70.55	111.01	105.66	15.98	85.93
107638349	XM_016341583.2,XR_002360460.1	96.56	113.37	163.82	82.41	147.45	115.83	106.8	100.12
107622919	XM_016324996.2	96.54	94.8	131.96	105.28	88	80.5	90.1	91.72
107461179	XM_016079649.2	96.44	142.64	147.11	92.19	111.34	98.7	38.13	94.41
107622460	XM_016324356.2	96.39	98.6	147.71	116.3	55.75	70.18	121.04	62.27
107631843	XM_016335414.2	96.36	202.77	128.72	74.72	83.5	75.04	49.86	99.55
107488797	XM_016109573.2	96.29	116.77	109.25	97.21	224.6	162.64	17.45	151.39
107623802	XM_016326174.2	96.21	9.47	84.53	45.33	1.02	2.71	0.14	0.74
107481298	XM_016101553.2	96.13	99.39	82.42	72.53	81.92	106.95	88.11	121.93
107644055	XM_016347839.2,XM_021124443.1	96.13	95.34	89.45	99.24	84.02	85.69	70.65	92.59
107478803	XM_016098937.2	95.97	136.5	89.5	103.04	164.88	133.09	280.71	196.86
107459644	BGI_novel_T008804,XM_016077871.2	95.9	69.83	154.24	50.57	30.17	37.71	20.63	50.79
BGI_novel_G000240	BGI_novel_T001328	95.8	151.63	163.2	74.23	144.48	106.66	116.56	120.15
BGI_novel_G000928	BGI_novel_T006217	95.63	131.22	131.42	81.1	84.52	90.01	14.45	87.26
107604726	XM_016306381.2	95.63	110.21	147.29	121.3	103.26	103.89	102.62	103.54
107476308	XM_016096112.2	95.54	86.33	81.67	82.95	75.06	94.2	65.52	91.24
107487176	XM_016107778.2,XM_021141910.1	95.41	90.53	85.79	84.15	87.71	101.31	439.34	107.11
107496664	XM_016117971.2	95.25	72.03	100.59	103.47	69.43	85.72	60.48	74.54
107623082	XR_002355121.1	95.24	64.23	81.84	177.85	70.07	128.24	34.44	80.39
107643197	XM_016346780.2,XM_021107338.1	95.22	85.65	121.52	106.67	69.28	69.91	69.94	69.75
107637260	XM_016340694.2	95.14	112.79	116.08	96.95	109.08	97.88	97.65	98.55
107618277	XM_016320292.2	95.1	85.12	112.76	100.84	51.3	58.56	103.12	70.38
BGI_novel_G002976	BGI_novel_T019715	95.1	141.17	110.94	117.87	212.95	141.16	170.85	134.81
107645628	XM_016349703.2,XM_021103872.1	95.08	74.1	108.87	111.83	70.76	92.43	71.68	73.55
107636396	XM_016339937.2	94.96	61.69	37.09	46.87	9.32	13.3	3.87	9.32
107486756	XM_016107325.2,XM_016107326.2,XM_021141111.1	94.95	60.37	106.53	124.7	45.61	73.28	47.91	47.84
107481870	XM_016102216.2	94.95	80.45	79.9	92.96	74.48	84.26	57.11	74.79
107609281	XM_016311166.2	94.91	100.22	70.2	62.45	0.03	0.43	0.13	0.1
107493477	XM_016114574.1,XM_016114575.2,XM_021124597.1,XM_021124598.1,XM_021124599.1,XM_021124600.1	94.76	86.49	93.13	102.26	88.3	94.73	67.59	85.32
107487607	XM_016108273.2,XM_021142088.1	94.74	83.51	94.09	124.5	101.38	93.04	68.6	88.76
107476288	XM_016096092.2	94.71	99.74	106.53	91.5	105.95	108.37	75.34	108.74
107639249	XM_016342728.2	94.68	70.9	135	133.95	74.28	85.98	77.03	80.87
BGI_novel_G004012	BGI_novel_T026054	94.61	85.22	135.03	93.7	82.56	77.25	61.02	84.15
107639601	BGI_novel_T018281,XM_016343147.2	94.54	67.84	137.93	128.9	58.84	73.51	62.48	65.03
107480133	XM_016100270.2	94.43	59.22	93.12	128.55	72.09	99.52	76.73	73.71
107622501	XM_016324425.2	94.38	79.84	38.13	81.72	83.17	109.54	54.29	68.45
107624804	XM_016327262.2	94.18	46.34	81.64	98.45	34.71	43.51	19.81	29.57
107608967	XM_016310765.2,XM_016310766.2,XM_016310767.2,XM_016310768.2	93.92	117.34	113.81	77.83	110.53	94.03	86.79	110.79
107487260	BGI_novel_T005229,BGI_novel_T005230,XM_016107879.2,XM_021141856.1,XM_021141857.1,XR_002375093.1,XR_002375094.1	93.91	102.53	84.67	82.15	116.13	105.1	72.57	113.72
107625807	XM_016328531.2,XM_016328532.2	93.72	88.86	120.21	94.28	80.59	82.29	62.12	77.37
107475372	XM_016094999.2,XM_016095000.2	93.66	99.89	142.8	107.55	91.23	95.25	70.25	87.19
BGI_novel_G004383	BGI_novel_T028331	93.57	65.61	58.55	106.36	77.41	66.23	54.49	46.64
107607151	XM_016309130.1	93.54	59.15	103.17	107.97	41.53	70.37	117.67	105.65
107623640	XM_016325980.2,XR_002355322.1,XR_002355323.1	93.5	90.69	138.39	120.21	88.12	96.43	71.68	83.56
107622328	XM_016324185.2	93.31	66.61	125.16	129.3	67.59	88.82	65.95	74.55
107643365	XM_016346982.2	93.29	86.1	110.94	86.22	82.13	81.38	65.77	75.35
107642375	XM_016345712.2	93.26	74.64	122.19	123.34	56.92	100.76	40.83	80.8
107608886	XM_021107513.1	93.21	99.92	34.21	106.18	152.64	125.39	73.68	121.45
107625865	BGI_novel_T014992,BGI_novel_T014993,XM_021116252.1	92.97	111.53	46.08	51.33	138.74	133.98	45.8	91.81
107481822	XM_016102144.2,XM_021139343.1	92.97	131.67	142.62	96.37	172.04	127.66	47.26	112.1
107626163	XM_016328966.2	92.61	65.35	122.58	114.44	52.8	75.19	61.26	61.37
107630231	XM_016333318.2	92.55	90.88	22.53	63.48	110.44	167.65	134.99	139.87
107604665	XM_016306297.2	92.53	142.22	37.11	125.92	118.66	118.83	1122.65	235.75
107476666	BGI_novel_T002474,XM_016096521.2	92.44	112.87	114.36	115.33	41.62	42.21	32.41	48.64
107617843	XM_016319712.2	92.41	87.6	87.35	94.67	84.07	85.71	40.07	72.43
107619114	XM_016321337.1	92.18	61.19	149.31	131.53	54.9	81.79	56.59	67.9
107638866	XM_016342266.2	91.99	98.57	116.2	111.37	99.4	96.7	77.03	87.54
107469356	XM_016088735.2	91.98	80.77	56.62	79.97	99.18	101.95	98.28	122.49
107467777	XM_016086959.2	91.88	114.42	140.71	90.54	79.96	71.74	21.46	108.94
107459218	XM_016077437.2	91.84	50	141.99	172.68	18.53	30.92	37.74	49.57
107640576	BGI_novel_T013838,BGI_novel_T013839,XM_016344091.2	91.83	85.24	85.74	120	66.08	78.38	59.45	77.05
107495246	BGI_novel_T007719,XM_021125340.1	91.68	86.03	45.9	50.95	72.86	74.11	68.67	75.12
107490574	XM_016111348.2	91.65	69.11	87.93	114.52	69.56	75.21	56.12	64.86
107625942	XM_016328688.1	91.46	58.61	68.85	113.04	65.4	87.27	39.09	64.92
107618111	BGI_novel_T026391,XM_016320052.2,XM_021110788.1,XM_021110789.1	91.43	97.88	67.51	72.9	148.43	158.75	95.91	136.95
BGI_novel_G003899	BGI_novel_T025350	91.35	130.35	150.12	83.67	131.34	97.18	99.43	119.24
107629071	XM_016331763.2	91.34	82.39	100.28	104.62	66.59	69.85	62.52	83.94
107492719	XM_016113776.2	91.33	54.38	118.34	126.12	40.61	63.99	44.71	46.61
107644894	XM_016348847.2	91.31	75.84	120.06	116.43	66.67	76.33	57.53	67.39
107459328	XM_016077540.2,XM_016077541.2	91.23	78.45	94.66	92.81	76.06	85.13	64.51	80.32
107626427	XM_016329307.2	91.2	57.03	147.18	125.72	49.38	72.58	52.03	57.34
107479677	XM_016099785.2	91.17	70.06	138.86	103.94	80.52	81.83	66.88	59.14
107623559	XM_016325889.2	91.16	74.56	15.14	47.38	55.16	69.89	231	70.03
BGI_novel_G003281	BGI_novel_T021422	91.07	51.58	78.91	115.49	41.93	63.71	39.85	51.1
107461867	XM_016080419.2	91.02	58.59	115.49	92.29	45.99	60.78	42.66	47.49
107458073	XM_016076287.2	90.88	100.88	96.03	80.75	116.84	96.71	72.89	104.28
107479791	XM_016099895.2	90.86	77.39	130.75	98.68	49.25	58.75	38.69	46.23
107461217	XM_016079696.2	90.85	165.56	127.47	50.07	31.73	29.88	13.05	67
107631313	XM_016334721.2	90.68	103.83	123.81	82.68	120.4	81.58	55.39	97.85
107482769	XM_016103340.2	90.61	83.59	124.17	112.12	52.72	102.19	41.12	70.36
107647857	XM_016351901.2	90.61	81.18	112.06	97.47	80.95	79.08	64.83	86.18
107625527	XM_016328174.2	90.6	73.21	105.3	107.39	56.09	73.33	46.88	66.34
107645359	BGI_novel_T020697,XM_016349369.2,XM_016349370.2,XM_016349372.2,XM_021103723.1	90.52	91.48	107.11	86.56	93.16	102.98	115.32	95.13
107613428	XM_016315413.2	90.44	61.25	77.69	111.09	47.51	69.42	43.28	55.36
107631811	XM_016335370.2	90.4	71.49	126.76	123.59	69.67	81.79	74.41	76.08
107613125	XM_016314982.2	90.32	110.86	83.27	72.6	121.75	133.06	49.93	94.22
107619237	XM_016321490.2	90.27	58.26	140.09	113.87	54.29	65.65	56.69	59.32
107481756	XM_016102065.2,XR_001590630.2	90.24	85.22	114.83	98.85	105.98	92.4	60.86	67.28
BGI_novel_G000452	BGI_novel_T002900	90.24	134.8	237.04	101.22	250.07	115.12	126.23	118.12
107613803	XM_016315958.2	90.2	74.97	108.93	101.82	87.44	90.89	80.23	82.76
107606170	XM_016308171.2	90.1	58.51	98.68	115.26	58.69	65.32	82.32	53.49
107459001	XM_016077224.2	90.09	53.92	126.5	119.99	43.52	63.13	46.51	47.14
107642613	XM_016346022.2	90.07	41.33	30.37	110.35	27.91	60.13	23.34	41.74
107487208	XM_016107818.2	90.06	65.6	69.85	89.8	106.22	127.01	35.14	87.5
BGI_novel_G000675	BGI_novel_T004465	90.03	81.87	112.79	94.41	78.81	70.31	59.83	82.25
107638407	XM_016341661.2	90.01	112.51	137.09	84.5	113.08	83.2	92.78	123.54
107622793	XM_016324828.2	90	124.92	114.21	95.9	142.56	124.44	116.88	130.22
107641965	XM_016345324.2	89.96	213.85	205.34	99.45	232.14	131.05	79.34	184.05
107462143	XM_016080711.2	89.96	121.84	159.12	59.1	99.56	99.23	17.45	78.89
107492262	BGI_novel_T006843,BGI_novel_T006844,XM_016113266.2	89.89	90.18	93.1	79.87	60.8	68.14	34.26	55.47
107643806	XM_016347559.2	89.87	92.78	140.55	85.84	84.55	86.86	76.24	81.05
107623220	XM_016325407.2	89.86	86.91	111.82	99.1	70.36	79.83	58.66	69.59
107628763	XM_016331360.2	89.84	58.54	27.59	57.62	54.57	73.69	170.46	83.1
107609324	XM_016311238.2	89.81	90.95	39.31	127.35	87.21	64.18	787.32	106.14
107459699	XM_016077924.2	89.79	61.54	44.05	84.12	36.87	58.32	268.34	88.34
107482650	XM_016103177.2	89.74	28.64	112.85	123.13	12.59	38.97	55.07	41.04
107464188	BGI_novel_T010204,BGI_novel_T010205,XM_016083116.2	89.73	69.54	148.68	115.48	52.68	58.81	43.09	53.75
107489426	XM_016110177.2,XM_021142724.1	89.65	97.49	128.56	86.55	106.41	89.13	62.46	80.5
107481742	XM_016102046.2	89.54	73.83	131.46	122.72	58.47	78.86	61.56	67.6
107487217	XM_016107831.2	89.54	125.71	117.59	71.46	101.3	86.9	63.68	76.84
107482130	XM_016102528.2	89.49	104.87	153.65	96.78	108.74	108.57	91.27	105.25
107629835	XM_016332748.2	89.39	172.35	59.31	147.49	126.03	115.09	195.48	191.62
107605543	XM_016307448.2,XM_021105272.1	89.36	119.95	143.11	82.46	113.6	95.95	72.9	100.64
107629324	XM_016332086.2	89.24	72.07	109.61	101.87	82.06	89.83	63.15	79.45
BGI_novel_G002543	BGI_novel_T016682	89.13	116.29	144.56	85.34	105.25	93.37	101.97	109.5
107644423	XM_016348280.2	89.09	66.55	113.36	107.64	62.2	77.57	66.62	69.54
107458843	XM_016077047.2	89.07	64.04	165.4	133.06	64.09	83.42	65.58	69.47
107476654	XM_016096505.2,XM_021137405.1	89.06	64.81	122.37	111.83	55.98	63.15	58.08	56.55
107644032	XM_016347807.2	89.01	60.39	17.62	18.51	54.81	105.58	16.86	43.58
107491249	BGI_novel_T006504,XM_016112053.2	88.95	65.16	65.52	93.46	51.33	62.17	54.04	49.33
107617398	XM_016319157.2	88.72	93.35	90.78	55.81	89.18	79.1	58.07	80.72
107462054	XM_016080613.2	88.69	143.78	66.14	111.03	103.16	95.52	515.22	166.57
107491533	XM_016112384.2	88.69	86.99	74.82	76.9	101.92	101.94	74.16	92.49
107479122	XM_016099268.2	88.67	105.34	71.27	66.94	116.5	106.83	48.5	76.02
107459569	XM_016077837.2	88.45	54.62	97.6	104.49	64.03	80.33	64.48	55.29
107491722	XM_016112636.2	88.44	69.58	134.71	122.09	56.81	76.53	55.14	61.18
107623251	XM_016325439.2	88.43	86.41	101.11	108.46	90.29	95.56	79.05	87.73
107635172	XM_016338556.2	88.36	84.02	157.06	110.78	74.76	78.02	62.85	76.56
107481243	XM_016101479.2,XM_016101480.2	88.32	86.54	87.68	83.23	88.02	88.69	76.32	79.17
107624809	XM_016327266.1	88.28	159.27	176.42	62.68	140.42	94.72	122.72	123.01
107622896	BGI_novel_T027960,BGI_novel_T027961,BGI_novel_T027962,XM_016324967.2,XM_016324968.2	88.2	71.28	69.97	67.68	55.03	81.85	15.81	44.26
107645881	XM_016350014.2,XM_021104051.1	88.19	117.38	115.14	80.83	121.92	113.19	82.21	110.36
107648610	XM_016352415.2	88.08	63.85	60.17	78.13	61.73	79.55	34.73	61.3
107476190	XM_016095954.2	88.02	73.14	112.87	86.22	72.13	69.88	74.17	77.35
107470781	XM_016090203.2	87.99	61.74	89.62	156.11	56.71	103.01	35.35	71.18
107483284	BGI_novel_T004301,BGI_novel_T004303,XM_016103916.2	87.81	55.98	39.23	61.38	23.45	51.12	314.27	152.16
107482188	XM_016102592.2,XM_016102593.2	87.78	80.15	87.13	95.3	74.72	82.66	55.32	82.59
107618273	XM_016320287.2,XM_016320288.2,XM_021112446.1	87.76	92.69	83.42	71.39	104.94	100.81	59.09	93.36
107619215	XM_016321459.2	87.62	69.33	138.05	111.93	59.94	78.85	62.53	67.08
107624775	XM_016327230.2	87.6	148.07	122.7	93.75	177.95	133.24	149.01	140.35
107464478	XM_016083398.2	87.59	67	115.51	107.07	63.36	79.85	57.39	64.42
107478275	XM_016098413.2	87.49	89.14	113.05	100.01	66.74	87.99	43.66	82.87
107631059	BGI_novel_T012550,XM_016334756.2	87.47	79.42	66.96	68.35	73.82	91.68	65.83	90.04
107612751	XM_016314474.2,XM_016314475.2	87.37	72.88	93.49	102.01	73.6	82.41	64.73	77.34
107477591	BGI_novel_T002627,BGI_novel_T002628,BGI_novel_T002629,BGI_novel_T002630,XM_016097640.2	87.32	101.38	66.71	77.01	89.3	101.89	69.19	73.62
107480409	XM_016100545.2	87.11	109.51	136.62	78.18	99.69	88.47	99.74	113.41
107642123	XM_016345434.2	87.04	113.65	118.31	67.02	85.83	80.57	10.76	76.51
107481689	XM_016101984.2,XM_021139411.1,XR_002373127.1	87.04	72.78	35.11	36.13	49.82	54.83	17.39	30.81
107469405	BGI_novel_T000075,XM_016088811.2,XM_021133572.1,XM_021133597.1	87.02	85.76	71.21	76.1	83.4	101.86	47.43	87.49
107609881	XM_016311935.2	87.02	105.19	64.74	82.05	110.43	92.59	8.54	92.4
107613050	XM_016314885.2,XM_016314886.2	87.01	69.8	97.85	106.57	63.09	75.89	58.22	62.73
107625848	XM_021116244.1	86.88	114.97	60.25	51.52	63.42	90.86	33.7	83.75
107631562	XM_016335051.2	86.85	287.19	128.94	22.01	150	104.37	5.58	119.51
107628826	XM_016331430.2	86.75	64.75	114.58	108.3	49.33	66.68	47.88	55.02
107483082	XM_016103695.2	86.7	107	130.66	74.62	110.14	92.15	89.55	104.64
107475927	XM_016095610.2	86.68	88	163.1	92.47	76.77	70.33	71.56	66.36
107476001	XM_016095714.2	86.66	61.01	101.48	102.48	59.94	77.56	66.04	59.6
107473727	XM_016093316.2	86.6	57.05	127.72	109.99	50.37	72.3	54.37	57.22
107468273	XM_016087531.2	86.56	47.51	55.61	39.19	21.25	30.28	9.6	20.04
107464937	XM_016083907.2	86.47	96.98	92.38	83.34	111.27	99.38	69.13	105.58
107488047	XM_016108742.2	86.42	79.81	95.01	112.19	73.51	83.23	61.31	71.88
107644457	BGI_novel_T020230,XM_016348318.2	86.36	76.74	53.58	62.02	108.96	123.12	65.53	86.72
107605348	BGI_novel_T021983,BGI_novel_T021984,XM_016307204.2,XM_016307205.2,XM_016307207.2,XM_021105160.1,XM_021105161.1	86.24	73.17	90.02	96.79	70.5	79.48	67.08	81.1
107643238	XM_016346828.2	86.21	54.2	121.52	116.91	59.85	78.55	66.55	62.32
107644433	XM_016348290.2	86.15	72.04	98.66	83.98	76.98	83.78	64.4	75.21
107493910	XM_016114941.2	86.09	54.11	70.69	119.75	49.33	95.03	37.91	52.84
107645537	XM_016349588.2,XM_021103806.1	86.02	47.5	46.15	48.56	60.59	105.34	14.87	138.51
107623037	XM_016325206.2	85.8	52.72	56.02	70.16	27	46.61	240.04	165.43
107458684	XM_016076899.2	85.69	52	109.85	104.28	49.21	67.53	52.2	50.63
107467401	XM_016086488.2	85.52	54.88	93.69	115.76	64.3	73.86	59.3	62.97
107646048	XM_016350238.2,XM_016350239.2,XM_021103920.1	85.47	61.18	90.53	114.95	68.84	83.06	62.32	60.24
107630175	BGI_novel_T016133,XM_016333240.2,XM_021118690.1	85.43	90.63	70.38	64.48	84.26	80.37	66.22	74.41
107482187	XM_016102591.2	85.41	85.98	101.09	89.84	90.74	83.78	70.01	73.42
107479093	XM_016099246.2	85.28	66.17	100.06	94.88	66.35	80.17	66.31	67.63
107629489	XM_016332297.2	85.28	71.39	65.58	54.81	57.22	59.52	29.09	57.26
107486544	XM_016107090.2,XM_021141222.1	85.02	60.04	83.16	104.55	55.43	78.87	52.94	66.57
107465290	XM_016084270.2	85.01	62.72	150.22	111.5	46.54	59.77	55.27	55.3
107606387	XM_016308455.2	84.89	83.76	99.67	92.58	68.49	70.37	47.39	44.4
107461627	XM_016080160.2	84.79	170.1	173.6	50.63	159.2	80.31	43.8	104.99
107617555	XM_016319331.2	84.79	73.74	100.53	87.75	73.54	75.53	63.6	73.66
107608806	XM_016310537.2	84.78	128.53	60.31	124.44	122.85	111.58	627.59	204.9
107635327	XM_016338788.2	84.77	59.72	140.49	115.93	55.07	64.47	58.2	56.64
107479346	BGI_novel_T016384,XM_016099490.2	84.76	74.39	94.45	88.08	68.07	78.49	52.53	64.06
107475479	XM_016095120.2	84.7	57.84	102.25	109.3	57.21	68.81	53.76	58.22
107629412	XM_016332200.2	84.64	100.58	142.88	141.05	136.54	98.9	85.58	68.27
107645648	XM_016349727.2	84.59	47.49	119.23	126.47	35.66	53.87	39.75	41.14
107490404	XM_016111179.2,XM_021143091.1	84.59	53.97	103.26	113.5	47.48	62.09	49.5	52.86
107630348	XM_016333447.2	84.59	97.83	105.16	79.81	123.57	126.35	35.01	72.91
107478128	XM_016098277.2	84.56	95.12	50.75	52.67	129.43	121.02	43.62	104.82
107605548	XM_016307455.2,XM_016307456.2,XM_016307457.2	84.53	81.7	82	84.7	93.04	93.84	65.99	90.54
107469373	BGI_novel_T011739,BGI_novel_T011740,XM_016088750.2	84.49	92.1	132.73	84.53	77.18	71.31	71.94	80.2
107629396	XM_021117685.1	84.37	90.24	82.8	76.6	73.95	77.43	39.07	99.04
107469947	XM_016089335.2	84.34	68.48	91.9	125.11	75.81	79.65	85.89	71.62
107476960	XM_016096910.2	84.32	67.31	116.13	111.44	68.25	78.49	64.37	71.03
107623061	XM_016325197.1	84.19	97.85	131.69	110.07	118.53	100.59	81.52	66.53
107476459	XM_016096277.2	84.08	47.84	90.28	116.56	30.94	72.01	31.59	48.27
107617536	XM_016319343.2	83.99	109.58	31.79	28.87	37.34	60.52	18.47	22.95
107628863	XM_016331479.2,XM_016331480.2,XM_021117977.1	83.97	82.58	90.74	75.93	81.64	81.18	65	78.85
107644630	XM_016348529.2	83.94	65.49	102.25	112.29	79.63	43.16	35.96	35.81
107624092	XM_016326546.2	83.86	90.21	121.3	89.29	88.73	78.86	68.39	81.45
107496667	XM_016117974.2	83.8	77.08	97.44	94.67	59.01	61.07	57.9	78.82
107491361	XM_016112243.2	83.7	68.69	107.13	96.87	70.27	85.97	57.66	69.23
107647836	XM_016351880.2	83.64	65.47	123.41	109.95	52.61	72.99	56.21	59.16
107624024	XM_016326459.2	83.63	48.04	107.98	114.15	56.94	60.39	51.93	53.01
107483147	XM_016103770.2	83.6	48.56	98.38	82.65	27.84	38.56	49.34	54.23
107618632	XM_016320745.2	83.59	79.1	124.89	98.25	81.87	74.77	59.92	69
107460700	XM_016079082.2,XM_016079084.2,XM_021128747.1,XM_021128748.1	83.46	70.54	58.11	61.25	53.55	65.44	32.29	51.75
107485273	XM_016105784.2	83.27	109.51	139.37	65.99	161.47	144.01	33.72	165.65
107471359	BGI_novel_T028030,XM_021132482.1	83.18	75.67	78.51	107.21	75.41	79.99	102.27	63.72
107618655	XM_016320777.2	83.13	86	66.16	66.97	91.83	84.38	199.51	85.18
107606336	XM_016308387.2	83.12	131.1	110.09	45.05	20.02	21.99	7.49	46.78
107476189	XM_016095953.2	83.12	50.25	109.39	109.69	48.45	63.58	55.61	55.18
107491145	XM_016111922.2	83.09	67.05	96.24	101.62	64.92	82.56	47.35	60.44
107608716	XM_016310423.2	82.99	80.65	115.47	76.54	82.17	81.2	64.44	80.26
107617761	XM_016319615.1,XM_016319616.2	82.9	80.54	81.29	80.47	95.66	92.84	85.09	95.64
107608721	XM_016310431.2,XM_016310432.2	82.85	84.03	88.29	65.31	80.44	84.97	49.47	71.9
107628925	XM_016331561.2,XM_021117950.1	82.69	75.75	72.27	68.84	63.63	73.68	95.1	123.96
107623629	XM_016325968.2	82.53	52.04	96.99	93.63	46.63	62.25	55.05	50.46
107481474	XM_016101751.2	82.53	82.94	54.62	93.26	61.47	78.02	569.76	229.04
107622119	XM_016324031.2	82.47	81.04	94.9	107.64	74.04	73.92	63.44	86.27
107487501	XM_016108146.2	82.37	80.44	113.1	75.86	62.27	65.14	49.12	65.47
107461422	XM_016079908.2	82.29	78.98	71.91	99.52	65.73	77.56	60.91	69.9
107491266	XM_016112081.2	82.22	87.43	136.8	87.87	88.34	84.91	74.75	86.78
107643541	XM_016347222.2	82.16	45.17	114.43	121.83	40.21	57.62	46.01	45.28
107492215	XM_016113208.2	82.16	62.77	123.53	108.72	58.82	69.05	60.23	66.31
107617927	XM_016319816.2	82.15	52.33	105.72	102.72	45.49	62.77	43.25	51.49
107482314	XM_016102763.2	82.08	74.35	126.87	102.13	169.66	121.01	103.14	99.15
107469942	XM_016089328.2,XM_021133627.1	82	68.37	69.62	80.45	60.13	69.43	62.23	65.26
107465255	XM_016084237.2	81.98	101.83	78.54	31.61	40.21	42.85	13.57	35.58
107613798	BGI_novel_T023730,BGI_novel_T023731,XM_016315953.1	81.87	85.25	59.23	46.71	78.06	87.42	47.98	73.62
107480360	XM_016100488.2	81.79	68.23	105.48	92.99	58.12	66.67	51.02	63.07
107477720	XM_016097774.2,XM_016097775.2	81.76	79.46	144.12	63.13	64.41	62.96	54.98	62.61
107639011	XM_016342418.2	81.7	111.36	144.07	64.49	88.66	71.18	55.95	86.99
107464167	XM_021130275.1	81.61	83.44	144.7	95.33	79.97	70.03	65.51	81.88
107634963	XM_016338305.2	81.58	46.69	84.1	155.87	42.41	71.18	139.66	49.96
107476290	XM_016096090.2	81.52	79.86	124.45	96.09	63.99	67.41	58.13	69
107465592	XM_016084594.1,XM_021134722.1	81.49	79.97	127.32	96.39	68.48	64.32	66.43	76.07
BGI_novel_G002890	BGI_novel_T019039	81.39	129.51	112.32	69.89	129.9	119.64	100.05	202.48
107468545	BGI_novel_T011504,BGI_novel_T011505,XM_021134159.1	81.38	104.15	78.05	107.83	108.21	100.46	207.57	126.16
107618793	XM_016320950.1	81.22	62.02	134.71	101.77	65.71	80.15	59.66	68.42
107643487	XM_016347153.2	81.22	32.23	65.86	63.19	5.55	3.58	17.83	44.14
107618293	XM_016320310.2	81.21	93.05	87.82	66.46	105.87	88.59	76.66	86.16
107463660	XM_016082500.2	81.21	67.7	62.8	56.32	88.22	81.3	118.88	97.49
107646043	XM_016350233.2	81.15	91.94	79.1	71.32	99.76	91	68.29	84.4
107625476	XM_016328129.2	81.15	81.78	99.41	83.5	77.6	69.17	54.44	71.21
107638381	XM_016341617.2	81.04	69.18	82.71	97.03	67.65	74.15	57.67	60.13
107489692	XM_016110444.2,XM_021142827.1	80.91	59.88	116.02	91.32	48.87	64.29	46.33	50.7
107461870	BGI_novel_T009554,XM_016080425.2,XM_021129246.1,XM_021129247.1,XM_021129248.1	80.89	87.21	49.49	60.1	112.11	111.43	57.15	84.98
107648773	XM_016352594.2	80.87	36.66	56.47	31.4	15.22	28.72	0.47	9.68
107630612	XM_016333813.2,XM_021121634.1,XR_002361662.1	80.85	55.02	95.67	99.81	55.8	71.62	58.27	60.19
107629163	XM_016331875.2	80.84	45.31	130.92	107.33	54.24	89.52	67.83	68.91
107610030	XM_016312099.2	80.76	86.59	117.86	72.68	20.92	24.19	13.07	16.03
107606332	BGI_novel_T023507,XM_016308381.2	80.73	66.4	57.09	59.04	67.35	76.39	42.48	61
107645317	XM_016349318.2	80.72	57.16	78.22	154.85	32.55	46.81	27.46	30.25
107496670	XM_016117981.2,XM_016117982.2,XM_021127228.1	80.66	81.52	91.33	80.83	79.86	85.66	65.07	82.7
BGI_novel_G002663	BGI_novel_T017470	80.47	78.12	108.68	104.04	66.7	85.29	60.62	64.52
107476155	XM_016095903.2	80.36	130.47	108.75	67.09	110.46	70.5	53.5	128.25
107496155	XM_016117356.2,XM_016117357.2	80.34	85.86	83.27	70.34	86.92	82.47	55.81	72.16
107490723	XM_021143289.1	80.29	86.58	75.97	82.67	82.83	87.96	62.99	91.68
110272471	XM_021143891.1	80.11	65.93	103.84	116.24	43.83	83.89	33.03	64.7
107630138	XM_016333195.2	80.06	79.78	83.56	63.38	65.47	59.78	98.95	74.33
107470395	XM_016089797.2	79.99	33.11	19.14	36.52	19.18	25.54	5.55	12.33
107642920	XM_016346432.2	79.84	110.19	82.02	93.91	169.88	139.93	205.16	203.45
107618399	XM_016320453.2,XM_016320454.2,XM_021110989.1	79.79	75.49	102.14	96.6	58.41	72.01	45.89	56.41
107609050	XM_016310873.2	79.77	64.6	94.47	82.69	48.42	56.06	38.92	48.58
107632196	XM_016335886.2	79.7	42.87	86.39	102.45	35.65	58.18	35.47	38.02
107606374	XM_016308439.2	79.69	123.87	43.41	97.59	99.83	81.69	447.28	126.17
107644663	XM_016348574.2	79.68	74.14	80.31	66.66	27.92	28.94	59.27	60.03
107626202	BGI_novel_T015217,XM_016329027.2,XM_021116524.1	79.67	61.85	121.77	96.01	68.58	78.47	63.41	66.68
107481463	XM_016101739.2	79.65	58.09	110.82	120.94	59.76	69.59	62.85	60.55
107613671	XM_016315768.1	79.64	76.01	79.85	74.24	64.71	85.05	35.2	67.61
107623555	XM_016325880.2,XM_016325881.2,XM_016325882.2	79.54	75.79	103.8	87.03	82.3	84.9	66.86	80.38
107606084	XM_016308049.2	79.48	75.45	82.88	53.65	72.42	68.26	49.59	58.42
107472154	XM_016091703.1	79.44	55.24	83.93	87.94	66.62	61.12	45.37	52.16
107480627	XM_016100780.2	79.42	72.87	65	73.22	46.12	58.56	142.56	84.06
107492473	XM_016113500.2	79.33	43.92	97.2	107.68	34.76	49.23	40.54	42.19
107464517	XM_016083447.2	79.33	52.63	124.59	96.1	45.78	57.9	53.92	52.99
BGI_novel_G004430	BGI_novel_T028405	79.32	67.25	61.5	83.11	122.09	126.91	103.84	97.68
107460931	XM_016079362.2,XM_016079363.2	79.3	88.99	98.6	91.94	75.36	76.98	46.89	65.71
107491311	XM_016112149.2	79.27	54.22	76.23	82.71	56.23	68.65	47.13	56.49
107459061	XM_016077272.2	79.26	90.11	67.81	55.26	122.75	114.46	57.39	105.67
107617741	XM_016319584.2	79.2	38.45	27.9	19.53	29.97	37.36	13.11	33.34
110272435	XR_002367278.1	79.14	82.83	142.54	101.77	70.52	71.19	63.85	71.59
107648733	XM_016352562.2,XM_021104489.1	79.07	61.16	89.06	84.64	54.29	61.37	47.26	57.06
107630797	XM_016334041.2	79.07	34.88	58.04	157.06	19.78	67.18	16.79	22.8
107604909	XM_016306623.2	79	57.91	98.21	127.73	41.72	62.61	46.48	42.23
107644466	XM_016348327.2,XM_016348328.2	78.96	53.08	100.42	93.67	46.14	55.93	43.77	54.02
107642446	XM_016345844.2,XM_016345923.2	78.96	53.08	100.42	93.67	46.14	55.93	43.77	54.02
107637881	XM_016341148.2	78.94	89.47	85.62	73.98	104.17	93.89	65.62	97.21
107623268	XM_016325465.2	78.88	64.02	17.13	12	47.14	52.58	7.51	21.85
107495308	XM_016116416.2,XM_021125362.1,XM_021125363.1	78.83	64.3	86.14	90.69	62.01	78.41	63.13	58.08
107617328	XM_016319068.2	78.69	52.52	67.09	167.8	73.5	62.71	75.78	45.18
107483538	XM_016104157.2	78.64	148.84	71.36	46.55	42.14	39.78	22.09	40.15
107630460	XM_016333598.2	78.6	86.23	62.51	58.83	98.79	100.96	48.52	72.56
107642778	XM_016346252.2	78.55	126.03	87.8	76.37	124.76	99.2	99.74	110.47
107617152	XM_016318933.2	78.38	79.56	90.21	77.64	70.42	72.85	55.1	77.33
107604893	XM_016306607.2	78.37	55.11	118.04	100.49	48.98	52.7	48.84	58.47
107491138	XM_016111913.2	78.29	54.79	121.86	98.21	46.72	61.81	53.2	53.41
107467045	XM_016086059.2	78.25	52.72	108.91	93.69	45.62	65.77	51.57	54.18
107466559	XM_016085546.2	78.23	57.56	107.28	93.29	61.06	69.65	54.14	55.89
107461847	XM_016080399.2	78.18	85.7	85.16	103.84	61.41	58.04	35.65	59.86
107634961	XM_021121729.1	78.11	77.46	106.79	86.49	73.67	86.18	57.58	73.55
107476544	XM_016096373.2,XM_021137461.1	78.1	58.68	93.13	100.14	40.29	62.28	53.56	48.21
107462937	XM_016081626.2	78.06	122.26	153	78.59	259.05	175.91	159.96	202.21
107618985	XM_016321183.2	78.04	50.06	114.77	105.36	49.22	54.68	50.42	50
107645534	XM_016349584.2	77.98	121.48	95.69	80.34	105.79	79.86	140.37	127.25
107487467	XM_016108109.2	77.97	57.53	70.72	83.96	63.49	79.58	49.56	67.72
107496984	BGI_novel_T008182,XM_021127361.1	77.96	58.09	74.96	66.49	62.53	72.91	21.25	72.36
107646004	BGI_novel_T020934,BGI_novel_T020935,XM_016350174.2	77.94	75.81	77.04	67	56.23	59.1	33.89	49.67
107617768	XM_016319625.2	77.94	61.06	45.44	67.57	71.3	83.51	51.86	75.43
107643347	XM_016346963.2	77.91	58.23	98.83	98.57	55.19	66.43	60.99	63.09
107457967	XM_016076170.2	77.89	107.66	130.03	87.94	105.86	78.83	112.45	136.94
107628898	XM_016331529.2	77.88	78.74	93.08	85.53	86.7	93.7	78.87	81.09
107633400	XM_016337038.2	77.8	101.58	91.57	74.22	109.23	89.17	91.26	89.38
107622410	XM_016324288.2	77.78	51.01	83.86	96.71	52.43	70.93	54.83	51.8
107631378	XM_021119612.1	77.78	61.78	60.93	60.35	37.81	59.71	157.79	135.86
107617866	XM_016319739.2	77.77	34.61	18.75	71.88	31.03	60.94	226.86	57.31
107613531	XM_016315572.2	77.76	72.96	92.87	80.63	70.24	74.85	59.82	70.89
107642975	XM_016346502.2	77.76	60.38	100.37	128.19	50.61	62.36	34.72	45.14
107475382	XM_016095013.2	77.64	64.51	55.57	60.15	74.26	81.49	62.06	78.01
107476793	XM_016096696.2,XM_016096697.2,XM_016096698.2	77.57	91.91	97.34	67.58	129.82	108.22	79.57	107.36
107485629	XM_016106166.2	77.53	54.62	117.78	97.46	45.27	59.47	45.78	46.71
107462033	XM_016080588.2	77.51	87.53	53.3	47.31	76.81	86.46	44.47	72.9
107620327	XM_016322509.2	77.44	53.72	124.79	112.47	51.02	69.77	52.33	57.79
107470602	XM_016090005.2	77.36	124.71	114.75	69.55	147.55	104.65	89.52	117.98
107470347	XM_016089735.2,XM_016089736.2	77.33	70.73	88.11	77.26	67.79	80.78	53.45	64.92
107467374	XM_016086451.2	77.18	97.86	38.17	100.81	85.64	84.87	752.33	170.25
107625081	XM_016327648.2	77.15	45.88	104	108.46	44.53	63.9	42.63	44.95
107635679	XM_016339225.1	77.12	69.92	102.03	132.15	45.98	53.68	181.76	46.25
107622779	XM_016324810.2	77.07	76.41	56.97	82.94	94.73	97.95	88.72	144.38
107635731	BGI_novel_T018861,XM_016339286.2	77.02	100.7	126.75	57.41	79.1	60.82	35.5	66.95
107487159	XM_016107760.2	77	77.62	60.06	82.11	107.87	112.39	71.14	100.17
107624766	XM_016327224.2	76.94	78.58	64.76	72.47	11.29	8.53	1.74	7.51
107627012	XM_016329897.2,XR_001617552.2	76.89	75.45	92.04	60.73	77.07	72.03	69.23	81.89
BGI_novel_G003910	BGI_novel_T025403	76.83	89.99	75.91	110.87	92.61	68.36	278.06	96.04
107626061	XM_016328843.2	76.77	92.69	78.28	72.25	93.54	91.76	77.35	87.29
107645815	XM_016349937.2	76.76	123.44	104.76	70.81	89.78	78.5	75.67	87.07
107459618	XM_016077858.2	76.72	102.31	113.19	52.21	183.53	144.61	115.24	155.1
107629746	XM_016332628.2,XM_016332629.2	76.71	84.1	66.79	62.86	105.17	86.9	76.15	80.13
107644472	XM_016348338.2	76.69	46.9	88.15	92.62	38.53	53.32	37.06	38.85
107648475	XR_001621942.2	76.53	43.23	58.25	91.41	36.17	56.21	19.95	27.94
107623024	XM_016325144.2	76.49	81.11	74.31	60.23	89.85	73.64	69.94	88.31
107606052	XM_016308018.2	76.45	114.22	40.29	48.5	115.59	83.61	301.8	114.88
107475916	BGI_novel_T000235,XM_016095599.2,XM_016095606.2	76.44	82.23	124.29	103.66	48.45	60.58	101.79	54.88
107467052	XM_016086071.2	76.33	90.46	90.23	73.69	83.73	83.83	58.49	79.64
107459312	XM_016077525.2	76.29	65.66	91.26	83.72	61.13	66.35	58.39	54.98
107489237	XM_016109998.2	76.21	69.4	50.84	43.72	44.06	56.91	16.45	53.96
107469935	XM_016089321.2	76.2	78.17	16.95	52.45	54.52	63.02	307.06	74.59
107630099	XM_016333140.2	76.15	79.72	66.21	67.39	82.51	82.31	55.4	80.65
107618128	XR_001615156.2,XR_002361707.1,XR_002361713.1,XR_002361714.1	76.14	92.48	91.16	68.9	157.35	149.82	123.79	153.88
107496355	BGI_novel_T007991,XM_016117588.2	76.1	74.99	21.48	56.4	46.82	74.4	15.62	37.78
107644980	XM_016348967.2	76.08	64.48	82.37	69.45	77.13	73.35	50.34	63.03
107631410	XM_016334845.2	75.99	57.88	89.35	113.17	54.19	60.7	56.22	48.77
107464070	XR_001587010.2	75.91	86.24	125.37	74.21	80.96	85.22	68.27	75.9
110269968	XR_002358844.1	75.9	96.81	88.48	117.39	132.52	95.11	122.19	86.53
107467903	XM_016087125.1	75.78	292.85	261.11	55.41	254.44	75.6	80.88	117.35
107613461	XM_016315465.2	75.73	56.73	96.87	86.78	46.66	59.48	48.41	45.78
107641336	XM_016344833.2	75.71	61.23	90.31	81.85	63.3	69.65	45.8	52.11
107629612	BGI_novel_T015707,XM_016332434.2,XM_016332435.2	75.71	68.1	115.28	80.4	65.73	70.16	54.77	67.36
107476621	XM_021137434.1	75.68	62.64	89.49	81.64	52.06	61.8	46.76	58.22
107632186	XM_016335864.2	75.67	85.85	54.11	40.08	128.95	108.82	21.45	80.39
107618016	XM_016319937.2,XM_016319938.2,XM_016319939.2	75.67	70.73	65.61	64.98	73.25	75.08	53.82	72.15
107619146	XM_016321378.2	75.6	76.58	69.99	22.81	21.35	27.73	9.01	26.55
107629014	XM_016331681.2,XM_016331682.2,XM_016331683.2	75.59	84.21	87.79	64.06	115.74	99.43	64.91	92.97
107638285	XM_016341486.2	75.53	77.58	97.88	71.39	84.05	72.19	62.77	77.55
107625593	XM_016328274.2	75.48	58.23	87.19	73.9	45.39	54.18	47.31	53.83
107487148	XM_016107748.2,XM_021141918.1	75.48	60.95	95.76	87.21	58.74	67.68	58.36	60.95
107487349	BGI_novel_T005392,XM_016107963.2	75.47	53.63	125.06	80.85	45.71	57.11	44.5	52.99
107473868	XM_016093461.2	75.46	45.57	106.81	113.25	39.14	57.25	41.64	39.98
107483990	XM_016104599.2	75.42	53.39	105.88	117.4	60.97	75.91	65.74	65.32
107490042	XM_016110807.2,XM_021142947.1,XM_021142948.1,XM_021142949.1,XM_021142950.1	75.33	59.38	31.58	45.13	50.79	71.91	62.17	50.2
107466784	XM_016085789.2,XR_002365047.1	75.19	82.81	80.26	66.61	84.24	80.71	81.9	79.89
107482930	XM_016103519.2	75.16	68.46	72.86	46.67	28.97	20.46	79.52	37.3
107469798	XM_016089172.2	75.09	59.12	93.93	90.79	58.3	73.67	57.8	58.65
107643171	XM_016346751.2	75.02	67.65	96.47	73.82	65.55	71.03	51.19	64.04
107470221	XM_016089609.2	74.97	64.68	103.41	80.15	54.13	60.91	45.78	54.16
107617561	XM_016319338.2	74.96	88.01	99.99	69.46	91.09	86.73	46.92	88.51
107480752	XM_016100914.2,XM_016100915.2,XM_016100916.2,XM_016100917.2,XM_016100918.2,XM_016100919.2,XM_021139034.1,XM_021139035.1,XM_021139036.1,XM_021139037.1,XM_021139038.1,XM_021139039.1,XM_021139040.1,XM_021139041.1	74.94	93.35	100.74	51.78	112.78	91	66.75	85.65
107635285	XM_016338719.2	74.92	82.64	79.41	73.88	81.8	80.87	42.14	75.77
107494224	XM_016115276.2	74.82	82.56	101.66	87.2	82.6	73.38	93.53	73.85
107617875	XM_016319750.2	74.77	65.7	59.65	65.05	72.8	82.98	44.51	67.44
107635147	XM_016338524.2	74.68	58.71	68.17	80.91	67.69	80.47	81.07	89.23
107487154	XM_016107754.2	74.6	71.65	64.41	78.08	92.02	89.66	75.89	86.03
107487204	XM_016107813.2	74.6	161.73	66.42	122.06	118.32	105.68	896.42	174.86
107619086	BGI_novel_T026613,XM_016321298.2,XM_016321299.2,XR_002353841.1	74.58	54.21	85.77	90.48	56.47	68.32	58.24	57.43
107644314	XM_016348153.2	74.46	64.8	102.36	82.05	50.43	60.55	41.77	50.79
107487003	BGI_novel_T005290,XM_021144125.1	74.43	84.12	81.64	68.71	100.53	83.37	78.6	87.43
107644739	XM_016348665.2	74.38	66.98	108.64	76.03	74.85	79.78	53.11	60.27
107622913	XM_016324988.2,XM_016324989.2	74.38	74.18	78.37	78.7	72.49	73.53	55.69	71.49
107457628	XM_016075800.2	74.26	121.54	58.08	120.83	124.65	108.93	643.49	196.63
107483333	BGI_novel_T004318,XM_016103955.2	74.17	47.29	26.45	46.56	11.93	27.31	147.16	77.45
107482798	XM_016103386.2	74.14	103.74	80.31	76.23	84.52	46.75	83.99	80.05
107486633	BGI_novel_T005132,BGI_novel_T005133,XM_016107190.2	73.96	63.27	99.54	83.15	55.23	67.2	50.68	57.11
107471466	XM_016090936.2,XM_021133612.1	73.95	59.61	95.71	93.99	34.19	42.02	19.73	28.63
107644821	XM_016348755.2	73.93	82.07	100.1	72.49	68.82	62.66	40.51	54.53
107479871	XM_016099967.2	73.87	78.29	55.47	65.74	117.05	111.72	74.53	93.79
107476612	XM_016096450.2	73.78	62.29	103.57	88.92	44.07	55.34	41.11	47.53
107487265	XM_016107885.2	73.73	143.62	70.98	139.85	234.93	144.88	517.84	283.3
107495189	XR_001593453.2	73.71	51.33	47.51	93.85	68.79	71.74	25.62	48.14
107483338	XM_016103962.2	73.7	49.42	45.98	52.46	28.9	53.01	145.98	170.37
107619233	BGI_novel_T025230,BGI_novel_T025231,XM_016321487.2	73.69	66.55	116.38	90.43	53.33	58.15	45.49	58.27
107487190	XR_001591749.2	73.68	93.73	101.53	60.38	64.15	61.19	23.44	66.24
107608940	XM_016310729.2	73.6	36.27	102.62	94.16	26.89	41.46	31.2	30.51
107630665	XM_016333868.2	73.5	74.23	83	71.98	81.18	73.71	58.78	75.28
107469563	XM_016088936.2	73.45	65.74	32.85	23.15	63.19	58.48	21.04	35.86
107628870	BGI_novel_T015637,BGI_novel_T015638,XM_016331492.2	73.4	41.3	83.73	86	51.01	66.12	56.66	54.05
107622738	XM_016324749.2	73.36	59.91	108.51	109.98	38.42	45.96	20.43	31.36
107631539	XM_016335013.2	73.35	74.7	44.77	83.26	73.6	67.37	65.26	74.44
107637789	XM_016341106.2	73.33	39.3	108.75	103.97	40.28	50.83	44.79	42.14
107495513	BGI_novel_T007807,BGI_novel_T007808,XM_016116652.2,XM_016116660.2,XM_021125507.1	73.29	76.63	70.81	74.25	73.29	75.71	55.64	74.18
107629384	XM_016332164.2	73.28	93.1	69.99	59.84	113.82	103.03	30.8	77.71
107486867	XM_016107435.2,XM_021141376.1	73.19	60.24	50.85	71.29	62.51	73.92	39.68	58.96
107479948	XM_016100066.2	73.12	29.32	53.89	134.64	14.21	58.2	12.96	20.41
107488445	XM_016109196.1	73.07	62.74	99.01	79.29	68.82	76.3	46.95	64.36
107639536	XM_016343067.2,XM_016343068.2	73.04	96.29	82.76	59.04	88.63	80.8	65.49	71.47
107640704	BGI_novel_T013844,XM_016344210.2	73.04	114.87	94.24	41.78	72.6	61.81	12.66	64.1
107645043	XM_016349053.2	73.02	74.13	72.35	65.51	83.72	76.94	61.96	77.36
107631753	XM_016335299.2	73	44.85	98.43	96.91	44.5	62.42	45.4	43.62
107638908	BGI_novel_T017577,BGI_novel_T017578,BGI_novel_T017592,BGI_novel_T017593,XM_016342307.2,XM_016342308.2	72.91	42.79	33.1	48.06	18.52	39.29	260.77	114.75
107618439	XM_016320504.2	72.88	113.3	75.86	61.59	114.88	87.76	25.7	77.96
107472662	XM_016092164.1	72.88	40.36	52.59	73.83	48.79	67.72	40.88	57.68
107628837	XM_016331442.2	72.83	62.02	90.61	86.77	49.64	56.73	42.1	51.72
107492139	XM_016113121.2	72.82	69.01	80.55	78.99	64.22	75.92	166.34	82.01
107466182	XM_016085168.1	72.82	56.68	85.94	90.14	53.49	56.76	39.16	43.71
107461061	XM_016079517.2	72.7	55.61	83.43	73.22	48.19	56.3	39.82	50.07
107642447	XM_016345809.2	72.56	57.67	97.21	77.91	27.91	34.54	11.96	28.65
107471977	XM_016091541.2	72.5	51.84	91.88	91.35	48.19	53.29	50.41	46.47
107466992	XM_016085993.2,XM_016085994.2	72.46	63	130.39	99.9	57.88	57.68	51.24	59.78
107645662	XM_016349734.2	72.37	94.36	46.96	35.33	56.66	54.37	20.27	64.51
107629756	XM_021120757.1	72.36	52.04	97.53	90.96	47.05	60.11	46.21	53.3
107605332	XM_016307184.2	72.23	97.77	87.88	59.5	88.83	60.65	60.34	80.91
107477541	XM_016097581.2,XM_016097582.2,XM_016097583.2	72.23	52.75	79.79	86.76	48.68	60.53	42.85	46.41
107468808	XM_016088170.2	72.21	71.93	84.31	73.5	68.54	70.3	43	51.5
107622994	BGI_novel_T026720,XM_016325087.2	72.14	109.38	85.37	89.92	92.27	82.25	677.99	180.36
107473142	XM_016092687.2	72.13	60.13	65.91	69.02	59.33	67.43	45.42	54.26
107617449	XM_016319206.2,XM_016319207.2,XM_016319208.2,XM_016319209.2	72.12	73.79	45.78	55.98	32.56	35.34	21.83	32.76
107496649	XM_016117959.2	72.11	59.6	100.12	92.6	49.63	56.19	45.53	50.83
107479875	XM_016099970.2,XM_021138630.1	72.06	54.69	96.94	87.06	55.07	65.65	54.78	55.31
107463260	XM_016082025.2	72.04	48.28	90.58	94.39	50.44	57.79	52.04	56.91
107631993	XM_016335608.2	71.98	79.1	86.42	69.4	91.51	90.73	58.57	64.25
107609842	XM_016311888.2	71.97	73.72	77.95	54.23	126.21	98.19	78.08	104.08
107643344	XM_016346958.2	71.92	95.86	74.6	73.11	169.28	113.6	15.94	133.44
107483250	XM_016103878.2	71.85	86.59	92.63	85.3	89.54	81.09	61.46	77.07
107622408	XM_016324286.2,XM_016324287.2,XM_021113384.1	71.81	87.32	64.59	48.21	77.99	74.87	80.6	133.93
107631743	XM_016335283.2	71.76	45.35	75.33	103.77	36.89	57.41	29.1	34.11
107481859	XM_016102202.2	71.72	114.7	77.28	57.71	86.84	68.57	52.77	68.74
107608686	XM_016310393.2,XM_021107006.1	71.72	52.04	72.6	70.91	43.59	57.96	35.84	41.35
107487882	XM_016108574.2	71.68	89.18	98.17	62.98	68.75	59.33	64.9	87.36
107471235	XM_016090689.2	71.6	43.41	93.21	92.67	45.05	56.12	42.46	43.71
107487214	BGI_novel_T005247,XM_016107827.2,XM_021141884.1,XM_021141885.1	71.57	41.74	10.92	40.37	72.01	67.31	23.5	44.35
107635656	XM_016339198.2	71.51	39	59.26	114.03	77.17	107.11	84.18	59.46
107644425	XM_021106875.1	71.31	107.71	150.02	83.98	97.45	81.28	28.27	109.29
107494114	XM_016115143.2	71.26	80.67	26.2	81.39	66.17	76.96	708.6	132.99
107493367	XM_016114467.2	71.26	71.48	69.28	60.34	60.83	55.5	32.94	47.19
107481259	XM_016101499.2,XM_016101500.2	71.25	74.1	44.61	46.17	58.69	42.23	41.82	79.84
107630578	XM_016333767.1	71.15	82.93	101.09	64.25	91.3	77.67	93.88	77.68
107605581	XM_016307496.2	71.11	47.33	88.48	86.97	47.32	57.25	49.86	51.51
107648049	XM_016352073.2	71.05	52.67	125.05	94.34	39.01	59.93	37.76	50.43
107638398	XM_016341649.2	71.04	68.89	59.7	82.52	17.54	20.7	14.15	20.2
107608943	XM_016310732.2	71.01	87.6	87.72	51.19	81.83	68.2	55.48	74.93
107629781	XM_016332668.2	70.99	30.79	22.3	50.55	20.61	35.99	14.61	28.94
107628487	XM_016331139.2	70.99	61.9	61.8	60.32	85.63	88.63	37.04	88.92
107644289	XM_016348124.2,XM_021102889.1	70.91	37.54	81.26	93.76	32.98	50.3	40.2	38.99
107618099	XM_016320033.2	70.9	131.62	105.38	81.58	311.43	66.2	53.36	78.72
107484990	XM_016105533.2	70.86	37.6	50.61	59.44	26.2	32.48	15.6	20.66
107643373	XM_016346997.2	70.86	46.76	81.76	83.88	36.03	52.7	57.05	44.13
107623430	BGI_novel_T027872,XM_016325680.2	70.8	62.81	85.58	71.09	64.25	76.48	50.58	61.33
107486532	BGI_novel_T005157,XM_016107079.1	70.77	65.3	74.75	70.19	68.78	70.67	88.91	100.5
107492669	XM_016113716.2	70.56	108.41	90.19	74.83	105.84	80.94	114.59	130.97
107478743	XM_016098875.2	70.52	66.9	69.53	51.01	86.12	86.98	25.67	60.76
107493784	BGI_novel_T007257,XM_016114836.2	70.51	33.01	47.32	27.34	13.42	23.47	0.25	8.24
107618056	XM_016319982.2	70.45	56.92	73.04	84.62	47.8	52.94	28.29	46.94
107644545	XM_016348426.2,XM_021103044.1,XM_021103045.1	70.42	55.52	28.6	32.62	43.17	68.53	41.33	45.59
107619188	XM_016321430.2,XM_021111107.1	70.39	47.62	112.83	96.17	43.63	58.05	42.31	46.54
107483490	XM_016104106.2	70.37	106.7	135.32	55.81	80.65	64.93	57.4	83.41
107631788	XM_016335337.2	70.33	60.68	110.84	90.2	60.5	64.57	76.15	60.47
107640618	XM_016344131.1	70.33	45.08	95.31	82.18	28.7	49.22	32.17	34.03
107638640	XM_016341995.2	70.31	89.01	31.93	60.65	86.15	83.33	365.2	98.18
107608955	XM_016310747.2	70.27	59.67	87.15	60.14	56.66	60.96	47.38	55.58
107638832	XM_016342228.2	70.2	40.73	78.1	64.26	28.43	39.51	59.27	53.43
107486761	XM_016107333.2	70.19	79.82	120.19	77.59	70.67	60.72	48.62	71.08
107631786	XM_016335335.2	70.16	63.13	61.41	70.53	61.61	70.95	48.09	60.3
107491903	XM_016112825.2	70.14	45.02	87	80.98	44.51	58.92	45.87	43.66
107639404	XM_016342890.2	70.12	76.28	56.45	45.55	52.71	49.84	165.98	59.67
107487442	XM_016108085.2,XM_021142033.1	70.12	91.02	64.3	64.71	85.31	74.83	72.75	93.86
107614156	XM_016316383.2	70.08	90.86	62.8	46.3	64.65	74.3	7.48	93.81
107614349	XM_016316563.2	70	39.89	60.25	26.38	6.36	13.31	0.35	9.53
107635746	XM_016339306.2	69.87	54.12	73.51	73.38	48.07	55.32	54.18	53.37
107475958	XM_016095668.2	69.84	50.25	64.35	114.49	44.85	58.29	59.64	48.61
107458081	XM_016076294.2	69.74	77.71	63.99	53.09	36.43	33.05	15.53	35.74
107492490	XM_016113520.2,XM_021126410.1	69.72	51.05	83.6	86.68	54.55	68.23	50.44	54.11
107631094	XM_016334422.2	69.68	90.2	108.47	63.39	67.97	54.42	30.3	63.54
107486367	XM_016106901.2,XM_016106902.2	69.67	24.86	43.65	8.25	2.67	19.09	0.94	8.88
107495840	XM_016117039.2	69.61	50.91	88.69	84.7	48.1	55.32	41.46	51.01
107631815	XM_016335375.2	69.57	63.68	72.41	85.43	68.97	67.05	76.4	62.67
107496722	XM_016118045.2,XM_021127249.1	69.45	89.82	74.52	66.86	115.03	106.16	80.6	130.54
107608749	XM_016310473.2,XM_021107503.1	69.42	52.71	48.56	65.55	60.45	65.15	44.98	56.19
107617396	XM_016319153.2	69.35	32.84	122.44	210.05	3.99	8.71	9.84	3.1
107485966	XM_016106509.2	69.3	56.32	60.25	69.3	46.84	55.95	49.85	70.15
107482471	XM_016102975.2	69.21	85.8	93.03	55.43	69.76	60.67	24.48	66.86
107488251	XM_016108966.2	69.16	79.84	153.67	118.97	34.46	30.44	30.39	49.99
107626623	XM_016329551.2	69.15	88.01	115.63	127.54	58.38	20.82	22.93	28.81
107482205	XM_016102618.2	68.99	62.63	84.39	66.62	55.49	60.13	41.4	55.84
107635616	XM_016339134.1,XM_016339135.2,XM_021122221.1,XM_021122222.1	68.98	61.55	45.75	36.66	49.74	66.88	24.88	48.94
107466249	XM_016085236.2	68.95	72.73	110.64	76.62	71.8	68.25	63.84	76.58
107459153	XM_016077365.2	68.94	52.07	74.24	72.84	45.14	61.15	51.97	51.05
107622614	XM_016324577.2,XM_016324578.2,XM_021113319.1,XM_021113320.1,XM_021113321.1	68.75	105.45	71.91	61.52	69.69	65.77	57.3	64.15
107459526	XM_021128187.1,XM_021128188.1	68.75	46.75	89.26	81.63	40.14	50.63	42.07	45.03
107639752	XM_016343341.1,XM_016343342.1,XM_016343343.1,XM_016343344.2,XM_016343345.2,XM_021121635.1	68.68	66.69	75.95	62.94	74.04	71	59.68	63.16
107466297	XM_016085274.2,XM_016085275.2	68.67	27.73	18.05	60.89	24.99	46.95	53.7	30.87
107640145	XM_016343697.2,XM_016343704.2,XM_016343708.2	68.67	70.74	80.9	62.36	75.44	72.22	75.27	74.21
107463666	XM_016082513.2,XM_021130727.1	68.62	58.76	79.15	66.2	52.28	51.78	37.92	47.54
107488014	XM_016108709.2	68.61	62.87	101.32	58.12	62.76	71.94	94.96	57.86
107621581	XM_016323615.2	68.59	79.58	71.03	53.43	63.2	61.46	39.07	67.61
107482513	XM_016103040.2	68.52	54.8	67.42	86.57	57.23	61.55	46.64	47.69
107645380	XM_016349392.1	68.46	79.4	81.15	59.46	110.17	87.75	67.65	132.86
107480791	XM_021139009.1	68.45	116.41	100.7	55.28	121.05	66.27	45.59	72.59
107642929	XM_016346439.2	68.44	98.71	43.08	58.48	108.57	110.04	36.65	80.35
107635502	XM_016338989.2,XM_021122126.1	68.42	48.65	68.36	73.7	37.69	54.67	34.5	47.04
107465112	BGI_novel_T000985,XM_021126359.1	68.15	36.87	18.87	6	15.84	23.42	4.88	20.11
107623847	XM_016326241.2	68.15	65.21	70.39	67.31	69.87	72.78	57.96	64.75
107617792	XM_016319662.2	68.05	52.22	81.08	91.85	58.62	68.67	46.56	49.1
107623104	XM_016325254.2	68.05	53.34	74.5	77.52	46.27	56.85	51.34	51.79
107496003	XM_016117209.2	68.03	50.66	71.69	82.11	44.89	59.6	38.43	46.07
107643669	BGI_novel_T019643,XM_016347384.2,XM_016347385.2,XM_021123974.1,XM_021123976.1	68.02	73.83	59.67	48.18	91.25	102.69	51.99	87.08
107482221	XM_016102639.1	67.95	77.05	52.9	55.81	55.18	77.67	13.28	65.72
107477207	XM_021137516.1,XM_021137517.1	67.92	58.12	95.23	74.93	51.83	60.09	40.65	54.77
107645427	XM_016349443.1	67.82	65.91	101.99	72.81	62.22	64.61	50.39	59.12
107645863	XM_016349992.2	67.75	57.9	87.94	92.56	43.19	67.71	35.86	57.95
107638722	XM_016342085.2	67.72	60.97	81.06	104.23	33.3	44.73	19.74	42.05
107629203	XM_016331921.2	67.61	12.74	36.77	157.27	3.82	19.12	7.03	9.47
107471086	XM_016090534.2	67.58	43.07	72.25	90.5	37.41	58.65	42.52	40.73
107458644	XM_016076862.2	67.56	64.52	86.78	56.59	64.74	63.33	50.28	57.73
107482247	XM_016102677.1	67.54	40.53	69.5	84.75	33.61	52.36	31.62	37.29
107495999	XM_016117203.2	67.43	58.79	87.77	80.93	60.46	73.01	48.69	58.14
BGI_novel_G001015	BGI_novel_T006838	67.35	56.33	31.29	56.28	14.5	53.72	6.93	18.3
107475974	XM_016095686.2,XM_016095687.2	67.29	58.36	74.98	39.92	84.35	79.24	32.06	99.17
107482184	XM_016102587.2	67.23	47.12	72.68	81.19	41.25	54.62	38.61	42.53
107618664	XM_016320787.1	67.15	254.85	124.79	30.34	315.83	177.59	205.27	326
107487188	XM_016107796.2	67.13	78.24	71.31	53.93	59.55	68.39	34.85	66.83
107487655	XM_016108339.2	67.09	39.77	88.95	92.43	33.62	48.73	43.16	42.81
107485789	XM_016106325.2,XM_021140451.1	67.03	61.07	85.26	71.24	54.12	59.54	43.36	52.84
107469678	XM_016089056.2	67.01	55.25	71.7	78.25	53.73	63.49	47.7	55.3
107460132	XM_016078464.2	67	47.87	86.11	65.11	29.87	34.57	10.54	28.28
107643955	BGI_novel_T012507,XM_021105386.1	66.99	344.48	154.85	71.47	156.04	67.21	178.5	131.47
107605652	XM_016307602.2	66.92	64.41	61.61	76.36	51.94	58.86	50.99	51.98
107487495	XM_016108141.2	66.9	143.4	78.06	90.55	101.75	93.17	57.63	95.91
107487605	XM_016108271.2	66.9	42.09	73.05	102.95	25.37	34.79	17.38	20.86
107459805	XM_016078075.2	66.88	149	143.8	74.96	172.3	94.17	25.53	129.58
107644993	XM_016348988.2	66.87	66.98	75.05	77.92	22.39	18	7.64	16.81
107625885	BGI_novel_T015004,XM_016328615.2	66.84	59.12	106.11	104.28	59.22	73.31	56.39	59.64
107633373	BGI_novel_T013361,XM_016337011.2,XM_016337015.2,XM_016337018.2,XM_021123606.1	66.81	63.59	74.61	75.05	47.49	49.31	37.72	48.07
107644897	XM_016348849.2	66.7	54.44	53.38	65.07	71.05	74.55	87.72	93.81
107638409	XM_016341663.1	66.66	82.52	99.91	64.77	89.74	77.25	64.82	82.59
107613514	XM_016315552.2	66.65	40.68	58.84	71.92	46.61	66.27	53.24	52.91
107616578	XM_016318533.2	66.62	151.96	144.61	53.82	164.23	97.6	49.15	106.45
107480527	XM_016100674.2	66.61	106.1	82.46	60.99	81.34	66.82	53.7	82.18
107495510	XM_016116654.2,XM_016116655.2,XM_016116656.2	66.55	66.93	62.8	67.05	72.07	70.02	54.93	71.66
107608854	XM_016310604.2	66.53	62.87	45.28	48.28	89.12	78.65	50.63	72.47
107489288	XM_016110041.2	66.46	70.39	67.88	53.51	22.47	25.11	22.01	30.25
107464073	XM_021130759.1	66.42	61.72	46.46	101.97	69.67	78.88	26.87	51.82
107494247	XM_016115307.2	66.37	46.86	91.6	94.68	39.49	59.92	39.28	44.01
107608889	BGI_novel_T022606,XM_016310654.2,XM_021107437.1	66.32	33.53	76.49	83.25	30.65	45.08	47.67	33.38
107616656	BGI_novel_T026263,XM_016318612.2,XM_021110440.1,XM_021110441.1	66.3	50.15	17.47	20.53	68.4	87.7	22.45	39.18
107613648	XM_016315742.2	66.29	75.89	61.03	67.37	77.24	60.32	213.38	110.7
107481746	XM_016102051.2	66.23	87.38	68.2	62.45	115.19	96.72	39.73	76.12
107495066	XM_016116136.2	66.22	18.31	38.46	36.07	6.48	15.65	0.73	2.85
107635069	XM_016338433.2	66.21	46.36	85.97	74.15	34.27	50.59	37	37.31
107470937	XM_016090357.2	66.15	57.51	76.97	62.69	56.84	66.34	43.32	52.49
107467080	XM_016086113.2	66.12	48.86	113.78	103.59	39.85	51.12	44.19	45.16
107639059	XM_016342474.2	66.04	121.29	42.36	113.49	120.77	117.57	529.91	216.68
BGI_novel_G004384	BGI_novel_T028332	66	63.73	69.13	71.26	60.47	62.86	65.82	59.29
107489974	XM_016110746.2	65.97	42.09	79.76	103.84	30.24	49.09	24.92	29.68
107630676	BGI_novel_T016475,BGI_novel_T016476,XM_016333879.2,XM_021119056.1	65.94	40.24	69.7	89.75	50.88	76.3	43.15	51.51
107644467	XM_016348331.2	65.9	69.65	62.79	54.57	77.26	75.72	133.8	82.43
107619106	XM_016321324.2	65.81	50.55	84.52	86.1	47.1	63.14	42.75	46.54
107631803	XM_016335357.2	65.79	35.56	73.26	96.79	40.72	59.02	41.12	43.39
107637776	XM_016341102.2	65.76	52.37	113.7	89.04	47.5	56.65	47.97	50.34
107644487	XM_016348353.2	65.6	61.54	48.47	59.3	71.16	76.11	21.47	72.93
107493523	XM_016114614.2	65.53	52.27	55.05	60.62	53.77	60.93	37.55	51.2
107608973	XM_016310779.1,XM_016310780.2	65.51	65.07	77.09	61.13	61.86	55.74	48.43	49.32
107638976	XM_016342376.2	65.5	47.06	58.43	74.35	38.41	49.9	47.7	53.29
107635520	XM_016339006.2	65.42	53.5	71.31	88.41	37.83	50.96	22.71	40.23
107494702	BGI_novel_T007532,XM_016115736.2	65.38	40.71	71.89	88.38	37.41	49.17	40.31	40.55
107488549	XM_016109307.2	65.35	34.78	89.91	85.16	36.84	49.66	44.43	40.73
107626234	XM_016329070.2	65.33	45.49	50.29	78.96	34.08	54.69	174.54	66.67
107485854	BGI_novel_T015094,BGI_novel_T015095,XM_016106395.2,XM_021140986.1,XM_021140987.1,XM_021140988.1,XM_021140989.1,XM_021140990.1	65.26	76.78	86.08	60.77	53.72	60.27	31.82	40.14
107467447	XM_016086546.2,XM_016086547.2	65.24	70.38	98.84	70.74	63.36	69.15	53.67	62.53
110272840	XR_002364324.1	65.18	53.62	57.95	84.44	86.76	79.11	60.78	65.92
107629281	XM_016332030.2	65.1	40.29	74.95	95.88	22.48	52.09	28.73	36.15
107612967	BGI_novel_T023995,XM_016314772.2,XM_016314773.2	65.1	51.95	69.87	67.66	55.3	54.75	49.43	58.67
107613008	XM_016314821.2	65.09	66.18	48.48	58.67	39.94	37.04	17.41	31.23
107461237	XM_016079718.2	65.09	65.62	76.99	77.24	57.65	61.63	37.88	51.13
107465090	BGI_novel_T010505,XM_016084076.2,XM_021131135.1	65.08	75.85	53.84	65.78	98.51	92.11	63.97	82.03
107470106	XM_016089481.2	65.08	75.1	81.03	51.38	64.64	62.74	39.17	62.37
107482273	XM_016102718.2	65.03	85.16	64.99	53.97	92.68	71.02	33.16	75.22
107605545	XM_016307452.2	65.03	58.57	92.25	89.19	59.37	64.32	48.28	57.08
107468154	XM_016087400.2	65.02	72.73	65.01	55.64	77.8	63.22	58.68	73.29
107640400	BGI_novel_T013831,BGI_novel_T013832,XM_016343926.2	65.02	59.34	51.55	58.89	65.89	70.72	56.8	67.23
107616712	XM_016318653.2,XM_016318654.2	64.94	163.49	137.38	64.62	195.6	151.27	47.73	155.18
107604838	XM_016306540.2	64.94	35.85	68.38	78.43	34.65	51.55	38.64	39.15
107643426	XM_016347070.2	64.92	50.14	87.21	64.07	39.08	47.38	45.55	46.37
107617590	XM_016319381.2	64.82	27.58	46.48	118.02	38.2	45.08	10.37	16.94
107612732	BGI_novel_T024547,XM_016314454.1	64.71	41.46	48.09	90.98	40.55	52.27	43.27	39.8
107604646	XR_001612325.2	64.71	38.16	86.67	87.09	26.84	43.41	35.28	35
107479029	XM_016099181.2,XM_021137773.1	64.68	61.46	61.65	83.02	51.67	58.43	46.6	62.23
107629245	XM_016331991.2	64.65	33.81	65.79	76.46	33.34	47.18	33.63	32.51
107463817	XM_016082698.2,XM_021130866.1	64.64	73.55	90.8	47.34	128.14	87.2	19.71	58.04
107633125	XM_021123734.1	64.6	51.85	31.92	63.13	83.68	90.89	27.59	57.09
107480758	XM_016100924.2	64.57	56.88	29.04	34.46	44.05	75.87	35.24	96.7
107481254	XM_016101495.2	64.56	16.04	131.24	87.58	11.79	28.07	36.74	38
107613276	XM_016315203.2	64.53	83.24	72.01	46.5	86.38	82.62	52.5	75.55
107629725	XM_016332595.2,XM_016332597.2	64.52	59.84	87.07	71.99	46.46	46.82	35.58	41.55
107481049	XM_016101258.2	64.48	61.67	95	62.77	44.9	55.44	38.03	48.58
107609225	XM_016311101.2	64.47	41.72	62.02	62.27	38.25	48.59	40.33	40.61
107462560	XM_016081172.2	64.37	55.68	91.42	73.3	47.67	46.89	40.63	47.01
107487089	XM_016107675.2	64.37	74.01	60.35	59.55	84.17	73.78	66.9	84.92
107629265	XM_016332012.2,XR_002358661.1	64.34	131.63	113.67	68.93	97.27	62.96	11.61	83.12
107618296	XM_016320315.2,XM_016320316.2	64.34	57.97	87.23	74.08	57.5	64.05	48.37	55.44
107487409	XM_016108047.2,XR_002375131.1	64.32	60.53	49.87	57.79	64.61	69.74	54.48	64.03
107461632	XM_016080168.2	64.21	59.42	77.81	70.34	65.07	67.5	93.92	72.44
107623865	BGI_novel_T026968,XM_016326258.2,XM_021113256.1	64.19	50.47	63.68	44.3	43.39	50.2	18.23	36.69
107634640	XM_016338064.2,XM_016338074.2	64.18	56.93	76.46	77.6	43.9	53.08	35.76	43.52
107459556	XM_016077781.2	64.15	107.31	91.86	50.8	50.88	52.89	27.84	62.46
107635257	XM_016338674.2,XM_016338675.2	64.08	56.72	45.54	69.4	61.77	70.76	129.48	59.91
107630800	XM_016334044.2	64.07	68.71	62.01	40.36	97.69	76.24	62.78	63.36
110268961	XM_021116132.1	64.06	63.99	89.17	80.39	55.84	59.67	47.59	60.21
107460704	BGI_novel_T009180,XM_021128727.1	64.05	35.37	64.54	54.65	30.15	52.78	473.13	37.58
107604922	XM_016306639.2	64	63.64	61.4	55.89	54.2	60.78	38.68	53.06
107463827	XM_016082708.2	63.97	45.13	106.56	92.64	39.98	53.25	44.31	42.3
107609463	XM_016311454.2,XM_016311455.2	63.92	96.4	95.7	46.95	108.94	82.55	49.11	111.21
107462671	XM_016081297.2	63.91	139.86	61.58	113.39	91.17	73.9	312.11	134.99
107634999	XM_016338361.2	63.87	52.84	54.77	57.72	54.56	63.9	73.77	82.52
107617411	BGI_novel_T026028,XM_016319168.2	63.86	45.13	72.41	82.71	40.71	44.67	29.02	37.04
107638536	BGI_novel_T017374,XM_016341861.2	63.85	97.75	81.85	56.62	114.14	89.13	48.6	90.78
107471522	XM_016091012.2	63.83	64.91	54.67	54.52	67.73	72.71	57.31	134.21
107493783	XM_016114835.2	63.82	45.37	94.75	83.6	41.19	48.45	37.52	43.66
107492901	XM_016113965.1	63.76	64.82	104.09	81.44	62.63	62.09	53.44	60.17
107459063	BGI_novel_T022919,BGI_novel_T022920,XM_016077273.2	63.75	93.02	108.24	85.51	108.02	78	102.01	100.51
107462417	XM_016080995.2	63.75	38.63	57.61	58.71	27.86	34.62	37.71	49.71
107478309	XM_016098448.2	63.74	63.49	59.54	56.64	72.47	65.88	45.71	64.86
107609006	XM_016310824.2,XM_021105936.1	63.69	96.78	98.22	78.86	97.18	70.32	93.11	92.81
107463072	XM_016081801.2	63.68	82.44	67.16	74.51	102.03	90.46	189	131.07
107629336	BGI_novel_T015424,XM_016332103.2	63.67	76.2	118.08	74.62	72.04	69.87	65.17	72.5
107467011	BGI_novel_T011061,XM_016086012.2	63.64	66.77	63.88	60.38	60.08	61.69	47.93	55.65
107476693	XM_016096550.2	63.62	69.53	71.56	64.84	40.99	39.75	24.33	44.62
107635648	BGI_novel_T018809,XM_016339171.2,XM_021122236.1,XM_021122237.1	63.61	44.9	50.45	72.85	49.53	64.15	46.72	54.38
107477572	XM_016097617.2	63.61	132.01	136.15	59.81	130.79	74.24	38.11	58.04
107623044	XM_016325175.2	63.57	75.89	84.38	51.91	64.15	59.07	40.14	62.84
107624058	XM_016326500.2	63.52	46.7	90.69	77.03	43.14	50.91	38.24	46.21
107624742	XM_016327183.2	63.41	58.88	69.38	66.34	61.85	67.8	51.62	57.78
107495846	XM_016117045.2	63.39	44.56	88.17	80.31	39.57	49.5	46.36	42.45
107459726	XM_016077971.2,XM_021128235.1	63.38	50.29	68.68	79.17	47.74	57.41	47.21	52.05
107629738	XM_016332620.2	63.29	126.79	137.6	66.58	146.91	73.66	41.71	53.16
107623315	XM_016325556.2	63.27	51.84	74.91	71.49	57.16	59.75	49.7	56.56
107638914	XM_016342312.2	63.26	47.53	23.38	34.98	15.56	49.52	119.24	89.62
107466148	XM_016085132.2	63.17	30.88	54.62	110.22	16.63	43.51	28.11	30.32
107625148	XM_016327726.2	63.14	52.99	78.19	71.15	36.74	56.16	18.06	41.9
107609657	XM_016311664.2,XM_016311665.2	63.12	37.93	76.14	62.29	23.94	32.95	25.93	23.15
107461611	XM_016080137.2,XM_016080144.2,XM_016080153.2	63.09	64.4	75.71	57.99	68.36	64.04	66.22	66.88
107485337	XM_016105852.2	63.08	54.74	74.08	65.54	54.25	61.88	50.09	54.29
107480545	XM_016100700.2	63.01	83.5	68.51	52.04	85.49	76.39	46.55	76.97
107492046	XM_016113013.2	62.98	41.52	79.57	89.13	39.4	57.55	46.74	48.83
107635661	XM_016339203.2	62.95	60.49	27.07	30.58	59.73	72.78	43.93	75.83
107459903	XM_016078208.2	62.93	34.9	74.89	88.32	37.83	50.27	42.8	40.32
107641073	XM_021123947.1	62.84	44.82	56.99	75.13	45.13	50.13	36.65	42.89
107619666	XM_016321960.2	62.71	41.35	84.48	86.43	38.68	47.73	38.08	39.95
107623379	XM_016325617.2	62.67	113.73	65.54	91.09	80.91	75.1	616.01	129.23
107476859	XM_016096783.2	62.66	71.23	79.61	62.38	65.01	60.79	50.71	57.84
107478926	XM_016099079.2	62.62	61.56	49.48	49.19	43.63	50.03	26.09	62.01
107463818	XM_016082699.2	62.53	43.22	103.74	99.22	37.96	56.49	38.19	43.17
107631945	BGI_novel_T017182,XM_016335545.2,XM_021120048.1	62.53	59.37	51.37	55.24	74.77	71.03	146.06	101.92
107625806	XM_016328530.2	62.53	63.04	46.34	72.99	81.09	75.88	369.64	107.76
107644614	XM_016348505.2	62.52	21.09	12.52	17.76	8.13	10.22	8.91	11.82
107462784	XM_016081442.2	62.52	41.19	74.79	76.72	35.04	47.22	30.75	36.14
107609566	XM_016311567.2,XM_016311568.2	62.43	33.95	71.87	61.07	22.81	33.57	26.8	26.57
107491405	XM_016112257.2	62.42	60.04	63.39	60.02	48.36	54.08	36.34	49.59
107623897	XM_016326294.2	62.39	36.19	62.5	97.24	26.26	57.62	33.38	35.75
107464461	XM_016083379.2	62.39	50.92	90.12	77.13	52.89	57.44	49.01	56.39
107479955	XM_016100069.1	62.35	63.99	54.32	47.82	66.71	62.87	81.26	51.99
107492241	XM_016113243.2	62.34	62.75	45.61	50.84	69.99	73.33	36.82	56.98
107464264	XM_016083191.2	62.33	43.35	90.8	74.65	35.43	44.33	40.24	40.09
107464902	XM_016083864.2	62.32	43.44	65.79	75.79	35.65	47.13	32.7	37.45
107487412	XM_016108051.2	62.29	45.82	65.84	96.9	60.47	60.94	38.94	45.54
107628767	XM_016331366.1	62.28	64.17	67.91	48.12	65.91	59.57	14.68	69.34
107619269	XM_016321526.2	62.27	65.11	78.71	60.58	64.33	67.65	39.14	63.18
107491598	XM_016112474.2	62.22	47.65	65.37	57.4	54.85	57.34	40.04	44.23
107492893	XM_016113955.2	62.17	48.88	80.99	65.96	35.59	36.78	38.49	40.73
107489941	XM_016110703.2	62.16	27.74	16.97	19.44	19.74	26.69	9.21	28.38
107473754	BGI_novel_T001494,XM_016093342.2,XM_021135139.1	62.13	37.49	78.58	83.56	35.14	50.37	37.84	38.25
107645616	XM_016349689.2	62.11	101.22	136.05	53.37	47.37	73.02	0.9	60.81
107463302	XM_016082087.2	62.1	85.23	47.6	46.13	100.62	85.41	28.8	90.79
107633439	XM_021119143.1	62.06	58.19	45.66	56.33	92.38	82.51	48.44	60.35
107475512	XM_016095167.2	62.05	33.84	50.67	90.95	32.83	40.18	25.84	36.41
107470478	XM_016089875.2	62.05	63.07	59.81	58.97	67.03	65.92	86.34	74.33
107474974	XM_016094615.2	62.03	54.03	69.69	65.6	47.39	56.22	34.51	47.01
107480348	XM_016100475.2,XM_016100476.1	62	39.66	38.77	82.09	38.21	50.48	42.51	38.98
107635593	BGI_novel_T018777,BGI_novel_T018778,BGI_novel_T018779,BGI_novel_T018780,BGI_novel_T018781,BGI_novel_T018782,BGI_novel_T018783,BGI_novel_T018784,BGI_novel_T018785,BGI_novel_T018786,BGI_novel_T018787,BGI_novel_T018788,BGI_novel_T018789,BGI_novel_T018790,BGI_novel_T018791,BGI_novel_T018792,XM_016339104.2,XM_016339105.2,XM_016339109.2,XM_016339114.2,XM_021122207.1,XM_021122208.1,XM_021122209.1	61.98	55.05	58.51	74.18	64.72	73.11	49.65	51.2
107613033	XM_016314866.2	61.97	43.04	94.54	28.21	26.44	34.54	0.69	18.93
107613433	XM_016315418.2	61.87	130.52	56	110.81	116.15	92.5	420.68	174.62
107613978	XM_016316187.2	61.86	65.57	97.31	64.29	63.34	64.93	89.87	55.22
107617316	BGI_novel_T026452,XM_016319055.2	61.82	40.26	54.08	60.65	24.62	46.24	22.85	49.38
107491724	XM_016112641.2	61.82	47.62	52.41	62.33	47.73	60.42	75	75.62
107475146	XM_016094764.2	61.8	38.22	75.06	89.27	31.61	40.1	40.33	39.03
107625169	BGI_novel_T014486,XM_016327746.1	61.79	60.11	80.73	63.7	76.11	60.99	61	50.16
107625907	XM_016328638.2	61.78	37.98	77.19	82.43	44.47	55.22	46.64	43.1
107458967	XM_016077180.2	61.74	43.18	27.36	49.27	34.66	51.01	47.78	61.68
107476210	BGI_novel_T002285,BGI_novel_T002286,BGI_novel_T002287,XM_016095976.2,XM_016095977.2,XM_021136210.1,XM_021136211.1,XM_021136212.1,XM_021136213.1,XM_021136214.1	61.73	95.98	73.13	56.96	112.39	99.85	252.43	169.38
107640664	XM_016344412.2	61.71	53.91	66.87	67.31	57.48	67.6	45.99	49.43
107625146	XM_016327724.2	61.71	40.18	70.91	73.57	21.32	48.99	16.59	32.63
107629493	XM_016332305.2	61.67	148.68	116.85	38.56	108.32	73.36	9.17	88.86
107460375	BGI_novel_T009113,BGI_novel_T009114,BGI_novel_T009115,XM_021128641.1	61.64	75.92	33.81	30.44	47.36	63.97	23.46	34.1
107464526	XM_016083454.2	61.63	21.81	106.92	152.79	51.14	64.33	59.45	86.58
107487232	XM_016107846.2	61.59	54.01	34.32	68.18	103.06	118.39	45.1	58.94
107635291	XM_016338728.2	61.59	65.8	102.7	78.2	60.83	59.74	39.75	60.68
107630713	XM_016333918.2,XM_016333919.2	61.57	40	82.19	49.73	43.35	44.97	31	16.72
107646157	BGI_novel_T021178,BGI_novel_T021179,XM_016350354.2,XM_016350355.2,XM_016350356.1,XM_016350357.2	61.55	61.88	57.17	58.74	63.02	62.58	63.95	66.34
107639680	XM_016343237.2	61.52	67.96	79.03	61.53	51.4	54.18	41.09	48.98
107478875	XM_016099027.2,XM_016099028.2,XM_021138300.1	61.5	110.39	95.22	52.11	95.37	100.41	47.91	116.09
BGI_novel_G003760	BGI_novel_T024498	61.49	41.98	81.36	82.52	36.97	51.97	38.28	42.3
107622903	XM_016324976.2	61.42	50.35	36.48	135.92	28.08	47.82	21.26	24.12
107635431	XM_016338907.2,XM_016338908.2	61.39	97.06	94.73	55.96	104.8	73.86	53.81	82.75
107476647	BGI_novel_T002479,XM_016096498.2,XM_016096499.2	61.37	62.72	64.86	51.67	95.84	89.83	80.77	93.03
107467266	XM_016086304.2,XM_016086305.2	61.34	123.86	98.34	57.72	202.8	156	60.78	177.37
107631521	XM_016334986.2	61.33	66.78	88.41	68.37	66.64	66.09	60.85	71.13
107638387	BGI_novel_T017230,XM_016341631.1,XM_021120296.1	61.31	103.82	77.72	76.49	129.25	66.49	24.28	47.36
107634070	XM_016337653.2	61.3	47.8	71.81	81.17	36.12	54.34	46.35	40.5
107459727	BGI_novel_T008925,BGI_novel_T008926,BGI_novel_T008929,BGI_novel_T008930,BGI_novel_T008931,XM_016077974.2,XM_021128342.1,XM_021128343.1,XM_021128344.1,XM_021128345.1,XM_021128346.1	61.3	60.6	74.5	71.92	56.17	60.23	45.99	53.63
107469603	BGI_novel_T011813,BGI_novel_T011814,XM_016088982.2,XM_016088983.2,XM_016088984.2,XM_021133472.1	61.28	81.01	62.93	48.94	106.73	79.21	96.94	85.82
107622377	XM_016324248.2	61.22	42.35	80.12	73.2	33.76	36.77	28.92	32.53
107630202	XM_016333274.1	61.22	46.74	73.8	79.66	37.91	47.57	39.15	44.96
107628731	XM_016331313.2	61.19	35.27	68.85	112.37	22.34	44.16	25.31	25
107630549	XM_016333720.2	61.17	56.99	80.2	71.87	48.24	60.28	46.08	49.78
107645632	XM_016349709.2	61.17	100.3	79.71	44.6	114.82	86.44	69.97	75.82
107608962	BGI_novel_T022633,XM_016310755.2	61.16	39.12	63.87	66.12	33.27	42.37	30.35	37.06
107495131	XR_001593442.2,XR_002375567.1	61.11	56.77	31.6	20.97	23.84	51.98	4.13	10.83
107466302	XM_016085302.2	61.09	53.07	72.93	66.25	51.97	57.22	46.86	49.91
107473207	XM_016092758.2	61.06	73.43	69.01	64.69	135.48	105.46	25.73	103.97
107476707	XM_016096565.1	60.99	55.62	53.99	54.28	48.79	54.22	86.24	98.76
107487182	BGI_novel_T005260,BGI_novel_T005261,BGI_novel_T005262,BGI_novel_T005263,BGI_novel_T005264,BGI_novel_T005265,XM_021141899.1,XM_021141900.1,XM_021141901.1,XM_021141902.1,XM_021141903.1	60.98	70.41	31.95	27.36	20.6	15.95	26.92	14.31
107617270	BGI_novel_T012692,BGI_novel_T012693,XM_021116980.1	60.95	74.55	72.5	56.18	84.69	70.77	51.95	70.76
107468680	XM_016088014.2	60.93	99.52	65.73	48.74	116.86	99.51	61.51	50.47
107626382	XM_021116699.1	60.87	54.73	91.79	64.35	56.54	50.84	55.01	59.82
107475936	XM_016095619.2,XM_016095620.2	60.78	48.35	48.43	47.71	51.36	54.69	27.97	42.43
107492082	XM_016113052.2,XM_016113053.2,XM_016113054.2	60.76	42.1	132.68	78.82	77.1	61.96	65.27	114.95
107617747	XM_016319597.2	60.76	67.33	79.44	61.25	76.74	72.22	65.1	77.51
107630762	XM_016333987.1	60.75	73.31	70.04	68.95	69.57	54.34	34.28	57.58
107618602	XM_016320710.2	60.72	65.85	52.46	43.68	23.34	25.21	40	41.27
107493169	XM_016114258.2	60.69	78.68	72.59	47.88	81.64	73.77	156.56	87.62
107642871	XM_016346369.2	60.67	41.72	52.36	62.42	38.31	49.03	40.33	37.88
107464051	XM_016082950.2	60.6	42.13	79.49	73.82	31.39	47.76	30.35	36.34
107638333	XM_016341560.2	60.59	66.57	77.53	52.41	62.79	52.23	27.16	60.53
107644559	BGI_novel_T020271,BGI_novel_T020272,XM_016348444.2,XM_016348446.2,XM_021103049.1,XM_021103050.1	60.57	56.95	57.13	67.04	64.56	62.95	49.53	55.11
107473173	XM_016092722.2	60.54	56.59	57.04	50.81	73.98	74.41	41.79	66.59
107612799	XM_021109213.1	60.53	42.6	38.92	49.22	38.93	61.52	21.71	44.15
107645079	XM_016349107.2	60.51	60.53	66.74	100.1	36.01	59.67	23.64	33.26
110277339	XM_021134497.1	60.5	49.98	47.29	64.92	65	58.94	50.53	50.14
107620382	XM_016322546.2	60.48	84.79	87.01	57.2	44.19	42.75	101.12	51.88
107468282	XM_016087544.2,XM_021133530.1	60.46	62.17	58.84	55.58	64.27	60.16	39.91	57.8
107622491	XM_016324416.2	60.4	52.02	84.22	81.67	56.49	54.76	47.02	50.77
107630674	XM_016333877.2	60.4	58.78	62.79	71.39	64.49	67.96	45.4	62.23
107461196	XM_016079665.2	60.35	59.5	54.13	52.33	64.49	72.87	47.54	63.83
107492383	XM_016113408.2	60.34	180.67	109.19	26.99	135.85	90.37	31.97	137.83
107487510	XM_016108158.2	60.31	67.65	72.59	53.63	71.02	72.76	57.21	74.6
107638316	XM_021120362.1	60.27	72.53	28.82	17.9	60.07	91.19	31.65	49.03
107635536	XM_016339030.2	60.22	77.63	111.58	182.44	3.65	7.88	28.47	47.85
107645330	XM_016349335.2,XM_021103613.1	60.2	43.67	84.8	72.82	39.57	49.97	42.33	43.7
107463692	XM_016082547.2	60.19	48.28	58.94	66.7	39.95	42.97	24.43	41.56
107623270	XM_016325468.2	60.19	31.3	42.69	31.05	14.77	28.46	1.38	11.23
107623202	XM_016325376.2	60.11	104.15	62.45	56.36	75.8	64.99	83.94	62.71
107642444	XM_016345804.2	60.11	41.15	66.08	69.8	26.8	50.56	29.23	32.53
107634947	XM_016338274.2,XM_021121717.1,XM_021121718.1	60.07	67.22	59.04	55.3	77.87	76.26	53.03	69.27
107495799	XM_016116984.2	60.01	49.5	60.03	60.12	29.79	32.19	21.29	27.74
107482497	XM_016103024.2	59.99	42.61	87.19	60.43	52.99	61.96	43.74	53.61
107465752	XM_016084727.2	59.88	48.99	46.06	77.26	56.98	63.54	166.77	55.82
107481703	XM_016102003.2	59.88	210.92	86.38	14.6	105.85	78.61	4.58	88.06
107638844	XM_016342241.2	59.85	55.51	49.35	66.08	79.9	80.86	47.39	59.65
107623319	BGI_novel_T028185,XM_016325527.2	59.79	67.52	83.13	99.75	94.77	51.64	51.03	45.26
107604839	XM_016306541.2	59.71	82.16	85.52	51.49	97.5	79.77	79.97	92.53
107609325	XM_016311239.2,XM_016311240.2	59.58	62.68	68.16	44.17	45.59	46.01	23.68	43.03
107638356	XM_016341594.2	59.48	68.72	56.29	50.05	64.84	58.81	45.69	61.19
107467016	XM_016086021.2	59.41	47.27	68.18	80.5	42.45	50.52	34.04	37.38
107618047	BGI_novel_T025088,XM_016319972.2,XM_016319973.2	59.4	63.47	77.44	54.05	57.02	52.54	43.77	55.91
110268046	BGI_novel_T027384,BGI_novel_T027385,XR_002356079.1,XR_002356080.1	59.35	36.66	10.01	8.4	14.94	31.2	10.44	17.49
107496850	XM_016118180.2	59.31	59.62	80.4	41.28	56.24	67.29	38.59	92.94
107460145	XM_016078472.2	59.26	75.95	51.51	59.99	84.98	65.1	6.84	73.66
107475961	XM_016095671.2	59.24	43.39	85.16	67.75	34.96	50.56	37.19	42.57
107608689	XM_016310395.2	59.21	41.13	42.41	53.55	43.25	47.47	38.34	45.28
107612906	XM_016314689.2	59.15	48.97	47.01	97.01	22.89	14.09	9.09	11.77
107468737	XM_016088092.2	59.15	27.82	17.57	38.3	16.95	13.72	495.95	39.97
107490151	XM_016110918.2	59.08	39.69	74.63	73.6	31.2	42.65	29.94	35.44
107645382	XM_016349394.2,XM_016349395.2	59.08	34.38	66.36	79.83	18.95	51.26	28.02	36.18
107631048	XM_016334365.1	59.02	94.21	68.53	50.93	83.08	66.03	62.11	83.72
107471472	XM_016090942.2	59.01	64.05	67.67	48.97	63.04	53.91	51.14	59.47
107622580	XM_016324524.2,XM_021113805.1	58.96	61.42	62.16	66.18	96.66	77.92	105.72	80.29
107645969	BGI_novel_T020943,XM_016350133.2,XM_016350134.2,XM_016350135.2,XM_016350136.2,XM_021103979.1	58.95	65.29	60.12	54.61	71.4	70.28	59.65	65.96
107467803	BGI_novel_T011312,XM_016086991.2,XM_016086992.2,XM_016086993.2,XM_016086994.2	58.94	65.15	42.23	50.67	53.48	50.34	38.03	46.75
107623026	XM_016325147.2	58.92	33.08	49.02	89.65	21.22	34.78	40.64	43.64
107622850	XM_016324896.2	58.87	63.22	52.22	58.09	58.87	62.89	40.99	57.36
107625853	BGI_novel_T014984,XM_021116248.1	58.81	41.51	9.4	1.82	6.62	32.66	2.32	21.7
107475445	BGI_novel_T002032,XM_016095079.2	58.78	68.87	21.62	31.01	78.2	82.98	22.79	41.47
107624139	XM_016326600.2	58.74	40.53	15.96	24.84	36.11	47.96	14.35	46.7
107474573	XM_016094197.2	58.73	48.9	69.15	64.3	45.74	49.38	39.98	47.28
107473170	XM_016092719.2	58.69	89.68	74.56	46.47	86.44	62.76	55.94	73.73
107617574	XM_016319356.2	58.67	46.08	72.26	78.18	44.47	54	37.72	43.91
107485414	XM_016105942.2,XM_016105943.2,XM_021140805.1	58.63	60.96	64.99	58.94	62.83	61.63	49.58	57.05
107477660	XM_016097715.2	58.61	56.24	57.94	54.31	80.57	85.64	121.86	73.63
107483620	XM_016104237.2	58.61	53.04	56.45	58.88	64.35	69.43	47.89	64.73
107625656	XM_016328352.2	58.59	37.53	13	46.59	38.72	74.46	756	132.17
BGI_novel_G004393	BGI_novel_T028342	58.58	56.15	58.9	73.96	64.19	56.93	49.49	47.36
107482515	XM_016103041.2	58.57	48.89	62.73	62.52	48.94	55.99	42.77	51.82
107467039	XM_016086052.2	58.55	53.61	67.44	60.36	52.14	54.23	39.48	54.18
107617743	XM_016319586.2	58.51	43.14	85.01	82.24	35.94	42.78	33.09	36.92
107629120	BGI_novel_T002428,BGI_novel_T002429,XM_016331821.2	58.46	49.51	57.62	62.73	42.82	41.99	32.55	42.98
107483962	XM_016104576.2	58.31	56.71	66.85	62.34	55.58	56.65	48.65	51.17
107494703	XM_016115737.2	58.3	85.51	84.23	53.37	91.4	70.14	77.19	90.73
107467561	BGI_novel_T011245,XM_016086689.2	58.26	49.14	68.84	61.7	40.74	41.93	29.52	39.56
107629655	XM_016332493.2,XM_016332494.2,XM_021118175.1	58.24	83.67	74.02	66	85.18	70.9	41.72	60.14
107467847	XM_016087061.1	58.2	41.25	66.37	85.78	39.47	53.03	28.49	33.79
107614366	BGI_novel_T023942,BGI_novel_T023943,BGI_novel_T023944,BGI_novel_T023945,XM_016316576.2	58.16	35.01	43.11	34.15	19.65	25.87	6.91	15.57
107458252	BGI_novel_T022635,XM_016076449.2	58.13	65.97	26.84	43.53	41.91	46.9	440.48	77.24
107459341	XM_016077564.2,XM_016077565.2	58.11	66.49	80.41	61.75	69.19	57.85	53.15	52.03
107604928	XM_016306644.2	58.08	59.59	62.77	60.47	66.54	69.29	46.57	55.4
107643061	XM_016346608.2	58.07	34.61	69.59	90.47	25.88	24.12	26.33	45.13
107487738	XM_016108436.2,XM_021142112.1	57.98	49.64	53.72	31.75	48.9	58.14	31.64	45.63
107465118	XM_016084107.1,XM_021132302.1	57.9	57.28	52.77	56.14	69.21	64.58	61.06	69.46
107491678	BGI_novel_T006647,BGI_novel_T006648,XM_016112565.2,XM_016112566.2,XM_016112567.2,XM_016112568.2,XM_016112569.2	57.89	67.94	62.54	51.47	58.93	57.3	61.09	59.82
107631726	XM_016335264.2	57.88	41.09	52.01	72.06	49.51	52.92	39.8	47.72
107490454	XM_016111237.2	57.86	46.69	38.84	69.45	65.89	66.11	82.89	48.59
107632061	XM_016335698.2	57.82	73.54	63.45	55.11	82.73	76.4	16.73	63.85
107629979	XM_016332962.2,XM_021118299.1	57.73	42.97	81.81	57.31	35.3	46.63	35.48	40.93
107612560	XM_016314241.2	57.73	36.12	52.81	77.59	33.5	46.4	31.31	37.53
107617084	XM_016318913.2	57.72	48.71	69.06	61.29	9.77	13.83	8.58	11.22
107462798	XM_016081466.2	57.71	34.81	27.37	37.19	24.15	39.52	59.92	61.84
107459651	XM_016077876.2	57.71	48.58	41.67	54.17	49.91	54.39	41.06	52.56
107608838	BGI_novel_T022377,XM_016310581.2,XM_016310582.2	57.71	69.91	44.44	33.64	54.81	53.34	33.23	65.94
107462190	XM_016080755.2	57.7	44.34	57.77	20.03	7.49	11.54	1.51	16.48
107486071	XM_021141050.1	57.69	68.31	51.31	35.46	80.02	78.18	81.06	96.85
107624523	XM_016327019.2	57.69	13.53	26.08	124.24	7.03	28.72	12.41	11.86
107492670	XM_016113717.2	57.64	25.98	21.04	26.95	40.85	71.63	9.24	76.18
107608697	XM_016310403.2	57.62	118.11	62.9	14.61	74.1	53.85	5.32	51.61
107488095	XM_016108790.2	57.54	46.95	73.21	92.9	35.6	47.26	28.7	32.57
107616533	BGI_novel_T026414,BGI_novel_T026415,BGI_novel_T026416,BGI_novel_T026417,BGI_novel_T026418,BGI_novel_T026419,BGI_novel_T026420,BGI_novel_T026421,BGI_novel_T026422,BGI_novel_T026423,BGI_novel_T026424,XR_001614543.2,XR_002353642.1,XR_002353643.1	57.52	51.3	31.94	82.73	44.2	53.49	34.28	39.58
107457760	XM_016075934.2	57.51	67.74	64.29	61.27	45.73	43.88	50.91	41.47
107468722	XM_016088068.2	57.5	65.62	81.94	62.7	58.71	59.86	47.49	56.46
107623253	XM_016325440.2	57.48	50.59	35.58	27.14	22	25.15	241.72	68.93
107638994	XM_016342397.2	57.47	15.85	15.4	46.48	16.02	24.81	8.88	19.22
107471024	XM_016090468.2	57.45	38.77	58.39	73.99	33.49	49.78	35.39	38.34
107459957	XM_016078278.1	57.42	69	55.79	48.32	84.24	89.5	26.02	65.11
107618012	XM_016319926.2,XM_016319927.2	57.39	69.45	57.43	42.46	56.04	54.63	26.65	42.88
107475374	XM_016095001.2	57.38	55.5	45.88	66.28	64.92	66.51	210.05	76.3
107478103	XM_016098232.2,XM_016098233.2,XM_016098234.2,XM_021137860.1,XM_021137861.1	57.37	58.71	52.1	49.01	59.68	56.26	48.24	52.43
107479693	XM_016099796.2	57.37	34.59	64.18	86.73	46.93	66.33	40.64	43.97
107465308	XM_016084293.2	57.37	36.53	41.13	53.41	26.76	40.24	20.83	31.94
107622682	BGI_novel_T026736,XM_016324663.2	57.35	72.17	82.68	51.77	33.91	27.46	27.35	32.26
107631166	BGI_novel_T016797,BGI_novel_T016798,BGI_novel_T016799,BGI_novel_T016800,BGI_novel_T016801,BGI_novel_T016802,XM_016334516.2	57.35	58.44	60.44	65.58	59.97	67.59	40.45	60.45
107645910	XM_016350059.2	57.32	52.4	42.89	62.07	38.74	59.14	210.22	53.62
107493997	XM_016115030.2,XM_016115031.2	57.31	28.58	72.06	70.22	24.3	41.54	28.31	29.95
107618152	BGI_novel_T026534,XM_016320110.2,XM_016320111.2,XM_021111033.1	57.27	56.92	56.02	53.96	57.14	61.24	43.61	53.21
107474063	XM_016093647.2	57.27	52.22	77.49	80.22	37.37	57.92	24.09	47.55
107472650	XM_016092155.2	57.26	37.64	73.46	79.2	29.59	41.53	30.93	34.87
107488767	XM_016109530.2	57.24	36.36	65.07	68.29	27.84	42.54	48.66	33.34
107459206	XM_016077420.2	57.22	36.9	65.14	75.73	27.57	44.66	90.96	76.79
107631813	XM_016335372.2	57.21	62.48	57.93	46.48	59.98	57.51	39.78	55.4
107476435	XM_016096244.2,XM_021137174.1	57.2	24.47	59.35	70.77	21.06	35.06	24.58	20.67
107613756	XM_016315883.2	57.19	53.81	48.95	73.76	59.23	65.64	199.75	69.35
107489059	XM_016109835.2	57.17	78.51	61.32	39.44	75.05	62.08	53.45	80.81
107645039	XM_016349047.1	57.15	70.75	105.76	66.27	71.06	43.93	192.62	59.42
107466635	XM_016085631.2	57.13	67.78	81.67	61.88	69.06	74.76	34.07	52.72
107630148	XM_016333210.2	57.11	63.52	58.26	51.51	78.29	57.76	60.63	48.89
107639602	XM_016343148.2,XM_021121556.1	57.07	76.98	56.3	47.37	39.29	34.4	49.08	39.24
107476150	XM_016095897.2	57.07	66.9	68.17	51.35	74.94	68.03	83.32	77.31
107642404	XM_021106832.1	57.03	42.69	28.94	43.06	50.63	62.68	180.33	64.32
107493775	XM_021124695.1	57.02	46.61	65.03	60.27	38.45	44.95	33.73	43.11
107638410	XM_016341664.2	56.98	97.66	133.59	47.56	77.98	51.54	12.4	61.31
107618941	XM_016321134.2	56.97	69.88	62.43	41.72	98.69	100.04	43.39	68.39
107645260	XM_016349250.2	56.97	62.44	101.39	77.1	47.73	48.79	45.49	48.54
107491868	BGI_novel_T006685,BGI_novel_T006686,XM_016112778.2,XM_021126126.1,XM_021126127.1,XM_021126128.1	56.91	59.81	55.15	56.99	57.95	59.69	60.3	61.22
107460143	XM_016078470.2	56.84	29.43	50.21	78.24	31.88	49.38	29.3	34.71
107479765	XM_016099867.2	56.84	57.41	73.1	54.39	42.87	48.89	17.53	44.85
107628722	BGI_novel_T015682,BGI_novel_T015683,BGI_novel_T015684,BGI_novel_T015685,BGI_novel_T015686,BGI_novel_T015687,BGI_novel_T015688,BGI_novel_T015689,BGI_novel_T015690,XM_021118060.1	56.79	43.8	46.96	48.75	39.01	47.26	33.67	42.13
107644571	BGI_novel_T020276,XM_016348459.1	56.76	26.97	38.3	41.66	21.8	28.01	14.21	22.39
107496502	BGI_novel_T000779,XM_016117781.2	56.74	79.14	49.33	60.04	106.29	90.13	132.16	139.95
107628599	XM_016331232.2	56.69	53.81	56.52	61.28	65.24	65.05	47.65	61.52
107480614	XM_016100763.2	56.67	49.17	68.32	61.2	50.97	54.23	37.11	42.63
107460821	XM_016079230.2,XM_016079231.2	56.64	58.27	62.57	57.51	47.6	46.98	34.14	42.48
107642846	XM_016346337.1	56.63	73.88	80.05	54.54	67.62	53.37	57.71	71.96
107492906	XM_016113973.2	56.6	115.92	87.29	65.18	81.32	40.71	149.06	66.89
BGI_novel_G002380	BGI_novel_T015629	56.58	58	45.38	40.44	114.78	102.9	21.16	73.64
107464918	XM_016083885.2	56.58	62.79	40.69	62.32	75.74	66.41	191.88	79.22
107631161	XM_016334511.2	56.57	52.23	44.27	51.9	57.6	55.69	31.72	49.2
107612898	XM_016314673.2,XM_016314674.2	56.54	108.19	76.41	58.61	87.47	65.2	53.45	124.69
107604748	XM_016306413.2	56.53	43.5	57.79	82.2	26.15	25.46	58.37	28.34
107478000	XM_016098096.2	56.5	66.92	60.36	50.64	86.67	63.85	65.15	51.8
107638865	XM_016342265.2	56.49	52.94	58.06	62.82	54.23	54.67	41.12	49.95
107481833	XM_016102156.2	56.48	34.2	65.85	81.89	38.25	48.76	31.72	32.93
107631533	XM_016335005.2	56.47	66.11	34.24	31.8	92.56	82.54	3.42	89.16
107621539	BGI_novel_T026981,BGI_novel_T026982,XM_016323563.2	56.46	72.22	56.05	67.45	72.3	66.65	151.78	81.24
107625265	XM_016327860.2	56.46	35.4	39.72	24.25	19.03	23.54	8.24	20.47
107482012	XM_016102384.2	56.43	60.35	68.8	46.98	57.5	49.39	35.53	44.63
107612917	XM_016314702.2,XM_021109345.1	56.4	47.23	54.25	83.2	48.06	54.68	85.55	49.93
107482950	XM_016103539.2	56.38	55.14	85.55	63.24	58.95	61.26	49.98	67.13
107491125	XM_016111892.2	56.35	94.84	50.5	57.36	59.47	55.48	312.21	103.1
107482447	XM_016102937.2	56.25	55.72	47.46	52.85	67.63	59.73	67.42	62.7
107625417	XM_016328044.2	56.22	49.05	66.97	59.99	48.27	53.12	48.7	50.12
107622437	XM_016324318.2	56.21	37.91	51.9	45.09	26.78	33.91	22.48	28.78
107487383	XM_016108002.2	56.14	53.98	66.95	56.06	54.74	52.57	37.29	46.04
107488011	XM_016108711.2	56.08	36.58	72.12	65.6	36.54	47.86	37.76	38.99
BGI_novel_G000209	BGI_novel_T001170	56.08	97.76	87.3	62.16	167.61	101.9	46.55	142.44
107631111	XM_016334441.2,XM_021119387.1	56.07	32.12	13.83	38.11	30.58	45.46	267.41	45.55
107623003	XM_016325107.2	56.03	56.27	53.05	52.4	60.43	61.33	64.23	70.61
107496536	XM_016117814.1	56.01	52.42	80.15	53.44	44.79	49.55	41.64	47.39
107487791	XM_016108487.2	55.98	76.31	55.13	54.57	84.26	65.54	101.07	72.69
107466237	XM_016085224.2	55.97	42.06	90.96	70.58	31.93	39.3	32.32	40.41
107643261	XM_016346856.2	55.91	69.45	58.42	48.12	45.86	38.17	34.5	50.56
107626326	XM_016329191.2	55.87	8.94	10.59	97.82	8.93	34.29	13.92	14.58
107462920	XM_016081593.2	55.86	60.57	62.26	47.64	59.54	50.26	65.04	51
107623008	XM_016325118.2	55.84	39.48	66.77	65.98	39.42	47.46	35.83	41.93
107605978	XM_016307940.2,XM_021106327.1	55.82	76.29	46.59	46.63	5.1	5.84	11.91	7.68
107483296	XM_016103927.2	55.82	44.24	59.28	66.07	38.46	46.21	31.41	39.11
107623715	XM_016326064.2	55.81	46.9	21.48	32.35	41.19	67.6	47.69	50.92
107457623	XM_016075793.2,XM_016075794.2	55.77	42.17	41.23	54.29	44.86	50.3	40.92	46.81
107630823	XM_016334074.2	55.76	57.41	29.03	50.69	28.49	35.68	308.71	236.82
107470291	XM_016089684.1	55.73	58.59	46.18	40.54	65.38	65.81	89.65	66.23
107616386	XM_016318348.1	55.73	195.49	148.03	58.82	236.11	54.32	56.06	82.37
107639543	XM_016343078.1	55.71	65.76	87.5	53.07	53.42	42.3	37.18	46.11
107496137	XM_016117332.1,XM_016117333.2	55.7	39.29	63.61	57.81	43.88	43.31	35.69	43.32
107645993	XM_016350160.2	55.65	34.23	27.15	60.21	18.1	37.31	9.84	25.87
107623892	XR_001616676.2	55.63	50.34	79.85	72.58	42.94	46.94	46.39	42.88
107613260	XM_016315183.2,XM_016315184.2,XM_021109225.1	55.62	51	48.79	58.55	58.99	56.23	53.3	56.22
BGI_novel_G001475	BGI_novel_T010064	55.61	44.94	51.39	59.94	40.82	43.52	38.28	35.81
107466666	XM_016085670.2	55.57	32.39	70.01	85	22.29	41.21	18.13	31.36
107630208	XM_016333287.2,XM_021118662.1	55.55	73.69	74.22	49.26	81.89	65.24	58.6	73.07
107639577	XM_016343115.2,XM_016343116.2	55.54	34.38	57.9	67.81	35.83	45.14	36.41	36.56
107625981	XM_021116334.1	55.53	54.84	51.73	58.95	58.21	64.36	17.13	65
107461516	XM_016080037.2	55.51	45.15	43.31	72.72	52.31	58.31	239.97	65.12
107635736	BGI_novel_T018862,XM_016339292.2	55.49	58.4	54.04	48.23	69.58	63.66	46.58	59.26
BGI_novel_G002497	BGI_novel_T016467	55.48	51.69	58.17	46.33	46.72	46.84	42.78	48.36
107638308	XM_016341521.2	55.48	56.79	42.63	52.43	76.96	62.03	95.96	74.82
107457888	XM_016076076.2	55.46	83.67	43.5	69.69	63.87	60.85	384.61	101.25
BGI_novel_G003609	BGI_novel_T023538	55.44	39.97	24.16	46.71	31.18	46.22	42.18	57.54
BGI_novel_G002033	BGI_novel_T013419	55.42	52.08	48.41	46.18	37.91	41.23	28.44	36.4
107477588	XM_016097638.2	55.4	80.16	54.68	47.33	92.33	86.82	47.1	80.08
107468725	BGI_novel_T011503,XM_016088071.2,XM_016088074.2	55.39	36.98	75.04	73.15	36.12	40.56	33.66	34.15
107634136	XM_016337711.2,XM_016337713.2,XM_021117707.1	55.35	95.98	84.63	39.22	116.91	100.14	37.2	105.9
107628775	XM_016331371.1	55.34	65.89	54.75	44.76	65.52	60.26	48.53	64.09
107495076	XM_016116145.2	55.34	67.44	94.15	65.55	57.43	53.26	43.85	56.12
107482453	XM_016102985.2,XM_021132841.1	55.28	55.08	58.07	49.07	46.74	50.27	43.61	53.82
107478268	XM_016098404.2	55.28	71.63	44.81	60.06	47.77	53.1	15	66.53
107622960	XM_016325045.2	55.27	49.09	70.17	69.48	49.08	52.75	37.39	45.38
107606388	XM_016308456.2	55.26	75.08	74.83	46.34	44.44	33.54	10.24	32.78
110262417	XM_021112750.1	55.23	60.81	86.34	61.58	63.19	58.05	49.53	57.11
107629860	XM_016332795.1	55.21	64.56	36.25	37.4	57.96	53.96	25.54	52.41
107609115	XM_016310952.2	55.2	34.24	54.53	70.63	33.55	44.51	36.33	33.97
107617937	XM_016319831.2	55.2	66.68	32.34	43.23	66.46	78.45	23.7	59.78
BGI_novel_G003211	BGI_novel_T020988	55.19	41.36	51.66	55.28	41.86	53.49	39.2	39.59
107471482	XM_016090950.2	55.16	47.36	31.68	25.32	12.27	19.04	141.46	63.08
107475549	XM_016095212.2	55.12	88.98	56.12	65.69	69.95	56.65	572.48	141.21
107645360	XM_016349371.2	55.11	26.16	51.65	78.74	22.96	40.28	28.04	25.45
107476157	XM_016095904.2	55.09	86.76	45.66	89.46	90.33	71	185.01	118.74
107643095	XM_016346656.2	55.09	62.22	62.33	45.87	60.81	56.84	45.59	56.35
107612537	XM_016314228.1	55.03	57.45	50.64	61.2	64.13	51.25	50.07	52.83
107482389	XM_016102846.2	55.02	31.71	35.42	59.76	15.39	29.43	170.17	102.37
107486165	XM_016106720.2	54.97	37.76	61.56	58.66	34.46	44.01	32.37	37.5
BGI_novel_G000679	BGI_novel_T004496	54.95	44.65	52.17	73.87	20.98	36.93	36.01	33.28
107477989	XM_016098076.2	54.93	59.35	68.76	48.73	51.24	47.03	71.13	53.66
107638312	XM_021120364.1	54.92	20.4	29.26	10.42	4.14	10.32	7.52	11.11
107467054	XM_016086073.2	54.92	43.85	58.02	73.49	38.01	38.63	21.15	34.45
107630606	XM_016333798.2,XM_016333799.2,XM_021119005.1	54.91	50.1	50.93	52.38	46.33	47.81	39.43	48.43
107622752	XM_016324774.2	54.91	40.41	56.56	65.26	38	44.79	27.87	32.72
107638933	XM_016342329.2	54.91	44.4	61.26	69.76	42.44	49.98	30.4	38.17
107476916	XM_016096861.2,XM_016096862.2	54.9	69.8	53.06	45.4	68.77	63.91	437.59	88.33
107470174	XM_016089563.2	54.9	32.93	5.47	13.64	36.91	61.85	17.14	28.96
107617926	XM_016319814.2	54.9	29.29	61.57	74.07	26.59	37.67	31.57	29.57
107626594	BGI_novel_T012836,XM_016329484.2,XM_016329491.2,XM_016329502.2,XM_016329508.2,XM_021118312.1	54.84	60.51	61.54	56.19	60.13	59.94	40.55	62.17
BGI_novel_G000687	BGI_novel_T004598	54.8	29.38	21.11	80.25	24.39	50.74	29.67	42.63
107491986	XM_016112934.2	54.79	39.2	22.58	60.28	110.95	145.99	127.39	126.73
107487736	XM_016108434.2	54.79	74.71	59.48	59.55	71.12	54.41	154.79	85.85
107470119	XM_016089500.2	54.78	84.07	98.42	59.03	79.94	62.04	46.26	68.25
107462023	XM_016080616.2	54.78	77.27	26.22	20.52	27.04	43.7	24.7	20.53
107623612	XM_016325943.2	54.78	50.57	61.31	52.25	44.1	47.82	44.07	55.67
107467053	XM_016086072.2	54.76	50.37	48.91	33.63	48.78	47.63	34.93	43.59
107457928	BGI_novel_T008308,XM_016076115.2,XM_021127508.1,XM_021127509.1,XM_021127510.1,XM_021127511.1,XM_021127512.1,XM_021127513.1,XM_021127514.1,XR_002365511.1,XR_002365512.1	54.74	80.18	81.46	45.06	74.94	61.29	53.95	67.56
107628917	XM_016331551.2	54.73	40.4	59.9	68.24	48.44	48.52	43.52	45.28
107493136	XM_016114218.2	54.73	35.85	77.14	71.93	33.23	43.72	34.48	36.9
107632112	BGI_novel_T017082,XM_016335762.2	54.72	53.45	60.43	51.76	55.74	56.17	50.47	55.55
107476883	XM_016096817.2	54.71	33.93	76.97	65.29	31.56	44.3	36.1	37.93
107618646	XM_016320762.2	54.7	66.07	73.71	73.37	46.3	33.01	21.99	28.62
107648191	XM_016352163.2,XM_016352164.2,XM_016352165.2,XM_016352166.2,XM_016352167.2	54.7	57.81	56.24	48.72	53.49	51.58	50.08	55.64
107609384	XM_016311340.2,XM_021107395.1	54.69	49.52	36.44	44.13	63.33	66.5	149.69	73.84
107473876	XM_016093470.2	54.68	36.45	62.98	66.6	28.99	41.13	32.85	34.21
107488018	XM_016108715.2	54.68	60.95	55.86	46.85	59.68	60.36	40.52	56.97
107617887	XM_016319764.2	54.67	41.4	66.16	95.55	32.02	40.31	27.12	32.5
107468268	XM_016087521.2,XM_016087522.2	54.66	61.79	44.52	40.57	83.79	90.42	37.66	59.06
107645329	XM_016349334.2	54.64	20.49	57.4	98.68	11.79	29.86	13.98	22.66
107468020	XM_016087268.1	54.59	72.05	56.36	44.99	71.23	63.92	56.7	56.74
107639275	XM_016342757.2	54.54	40.07	74.01	66.77	31.7	40	27.32	34.24
107461718	XM_016080262.2	54.51	51.76	48.64	44.45	72.91	80.24	29.11	46.62
107629758	XM_016332642.2,XM_021118257.1	54.51	71.43	50.08	41.58	84.65	79.38	46.24	69.93
107487236	XM_016107850.2	54.5	54.37	33.85	48.75	59.41	61.8	24.92	41.13
107487570	XM_016108230.2	54.49	47.78	66.07	55.81	50.26	48.04	41.05	47.12
107629170	XM_016331883.2,XM_016331884.2	54.47	63.58	45.87	41.58	54.69	59.06	493.88	78.23
107477929	XM_021136847.1,XM_021136851.1	54.44	20.08	34.45	106.25	10.48	26.51	13.46	17.35
107629097	XM_021117842.1	54.4	84.26	116.62	51.18	122.18	70.04	26.07	57.73
107613144	XM_016315002.2	54.4	34.73	58.19	62.81	32.99	44.72	33.56	35.82
107632095	BGI_novel_T017092,XM_021119964.1	54.37	50.13	23.49	28.95	26.33	45.07	19.41	44.18
107632175	XM_016335853.2	54.31	61.61	51.15	46.63	45.62	55.75	12.06	49.36
107604756	XM_016306420.2	54.3	49.1	62.76	58.88	48.59	53.18	42.39	46.12
107459240	XM_016077456.2	54.3	61.33	43.3	45.51	79.38	73.76	49.38	66.59
107485970	XM_016106515.2	54.24	63.17	75.67	50.66	52.58	49.87	32.64	54.63
107645314	XM_016349313.2	54.23	37.02	81.58	88.24	15.07	15.37	16.75	10.05
107473233	BGI_novel_T001302,XM_016092791.2	54.22	45.33	58.68	59.62	47.8	52.99	42.29	46.7
107618565	XM_016320665.2	54.19	45.39	68.77	56.68	52.83	55.3	35.55	47.73
107629112	XM_016331813.2	54.17	41.24	21.88	31.13	115.58	107.6	155.27	78.78
107635633	XM_016339156.2	54.16	47.81	90.77	75.23	44.79	58.92	41.81	48.42
107635634	XM_016339157.2,XM_016339158.2,XM_021122231.1	54.09	69.96	70.84	54.91	75.4	64.35	45.4	66.87
107481454	XM_016101730.2	54.01	35.19	62.37	84.77	38.24	49.1	40.26	37.65
107648486	XM_016352333.2	54.01	68.78	65.69	37.7	118.16	77.72	54.52	89.37
107629992	XM_016332977.2	53.99	37.73	38.49	91.94	32.5	43.06	24.41	31.92
107632049	XM_016335686.2	53.98	58.74	70.46	47.6	57	50.66	39.5	54.67
107471867	BGI_novel_T012419,XM_016091387.2,XM_021132931.1,XM_021132932.1,XM_021132933.1,XM_021132934.1	53.96	86.91	62.49	53.6	55.38	49.56	45.15	49.04
107613845	XM_016316013.2	53.96	58.29	48.56	44.48	64.12	59.48	44.06	57.79
107625094	XM_016327665.1	53.92	42.99	33.43	65.65	34.92	44.74	32.33	37.4
107493470	XM_016114567.2,XM_016114568.2,XM_016114569.2	53.9	51.75	66.72	53.46	63.44	54.49	58.52	55.92
107482717	XM_016103269.2	53.9	37.72	61.95	62.59	24.84	24.76	28.63	17.63
107634462	XM_016337954.2	53.8	79.84	85.68	64.13	69.89	54.33	36.7	48.15
107491108	XM_016111871.2	53.79	63.08	58.99	46.58	66.68	59.2	47.52	63.39
107487528	XM_016108186.2	53.77	50.18	72.22	57.25	59.21	47.13	9.69	45.97
107613777	XM_016315927.2,XM_016315928.2,XM_016315929.2,XM_016315930.2	53.71	67.45	35.77	50.38	73.02	75.05	24.11	60.01
107487093	XM_016107679.2	53.71	31.9	1.7	3.01	16.25	45.11	1.37	1.04
107642540	XM_016345934.2	53.69	38.14	59.64	66.11	26.66	38	23.9	33.95
107605982	XM_016307943.2	53.69	59.87	27.07	64.93	41.84	43.07	480.62	82.81
107645987	XM_016350154.2,XM_021103960.1	53.62	61.16	40.19	45.93	64.36	66.29	37.75	50.86
107474314	XM_016093939.2	53.56	54.9	43.79	41.65	58.47	58.54	38.58	50.03
107612903	XM_016314685.2,XR_002352800.1	53.55	79.58	74.62	59.51	108.69	77.47	62.95	71.35
BGI_novel_G001327	BGI_novel_T008839	53.54	44.13	50.73	49.79	29.53	42.92	20.42	44.24
107642741	XM_016346203.2	53.53	80.21	57.82	56.77	78.09	54.94	213.96	94.84
107462508	XM_016081106.2	53.46	34.89	51.99	32.64	27.08	29.89	20.28	20.42
107617879	XM_016319755.2	53.43	46.82	30.16	31.63	26.41	43.18	22.25	54.1
BGI_novel_G002621	BGI_novel_T017254	53.42	70.14	80.94	41.87	63.32	64.56	23.72	63.62
107639266	XM_016342746.2	53.39	37	51.61	47.02	35.33	45.17	27.44	35.07
107487203	XM_016107812.2	53.39	51.61	59.01	66.79	34.44	37.22	25.92	33
107459645	XM_016077872.2	53.34	40.79	67.57	60.22	29.6	31.35	21.82	28.27
110266115	XM_021110061.1	53.33	106.72	82.31	32.68	125.04	59.25	41.5	103.47
107639285	XM_016342767.2	53.31	64.21	42.97	38.27	62.24	60.72	21.58	56.55
107494657	XM_016115697.2	53.29	39.78	68.37	54.94	40.04	41.26	27.61	38.08
107638367	XM_016341606.2	53.28	54.51	45.37	67.33	37.51	40.23	20.57	27.27
107622729	XM_016324739.2	53.22	45.12	48.54	66.39	54.28	53.05	67.78	57.84
107487256	XM_016107873.2,XM_016107874.2	53.21	64.72	64.36	64.56	72.08	48.11	62.11	50.94
107463424	XM_016082218.2	53.2	55.45	77.27	48.77	60.12	60.12	39.55	52.54
107460031	XM_016078353.2	53.19	77.91	81.35	34.79	57.64	46.93	50.35	76.36
107630013	XM_016333007.2	53.18	68.79	74.04	50.73	65.93	56.54	53.18	62.36
107611809	BGI_novel_T023634,BGI_novel_T023635,BGI_novel_T023636,XM_016313699.2	53.14	98.92	77.36	65.81	67.2	27.29	41.3	66.64
107475045	XM_016094696.2,XM_021135596.1	53.13	36.15	13.37	7.4	23.07	30.32	11.37	25.68
107492462	XM_016113485.2	53.1	3.62	26.11	18.61	4.82	10.01	47.25	11.52
107622931	XM_016325011.2	53.07	41.82	50.6	65.93	44.14	46.79	35.26	40.69
107481021	XM_016101221.2	53.06	41.21	42.24	55.67	51.18	61.48	50.03	69.96
107621592	XM_016323626.2	53.05	65.87	50.98	29.82	37.07	22.13	7.97	23.75
107460148	XM_016078476.2	53.03	36.35	55.21	90.55	23.41	37.47	17.84	25.89
107637286	XM_021122017.1	53	61.98	22.86	42.38	126.91	125.53	37.17	73.74
107472935	XM_016092459.2	52.98	55.73	55.21	57.42	61.29	58.46	34.21	62.42
107643670	XM_016347390.2	52.97	60.76	66.76	60.78	7.36	6.94	4.47	6.31
107619035	XM_016321244.2	52.96	40.68	98.41	67.98	36.58	37.43	38.98	37.06
107461727	XM_016080274.2	52.94	35.44	50.03	66.66	31.18	37.85	28.15	30.97
107631346	XM_016334773.2	52.93	45.85	65.82	65.83	36.8	46.7	33.78	34.67
107483248	XM_016103876.2	52.9	46.79	51.97	56.7	45.88	51.68	37.68	43.16
107609127	XM_016310972.2,XM_021105863.1	52.85	54.79	68.75	45.77	51.24	48.73	41.1	44.23
107626160	BGI_novel_T015199,XM_016328962.2,XM_021116499.1	52.84	36.88	54.2	94.23	36.57	46.05	65.93	41.33
107458305	XM_016076506.2,XM_021127639.1	52.84	48.44	47.44	58.48	50.01	57.52	39.07	50.73
107644246	XM_016348060.2	52.8	42.43	43.27	68.27	63.66	60.41	144.5	54.6
107639002	XM_016342406.2	52.76	43.1	64.34	78.83	49.3	58.93	41.29	44.22
107474642	XM_016094279.2	52.75	35.29	57.03	50.92	32.81	41.96	30.24	32.69
107644542	BGI_novel_T020265,XM_016348423.2,XM_016348424.2	52.75	46.23	59.04	55.6	44.55	50.96	41.41	49.44
BGI_novel_G002200	BGI_novel_T014570	52.74	49.71	39.22	41.44	56.39	56.12	36.84	47.55
BGI_novel_G000488	BGI_novel_T003111	52.73	72.51	53.71	66.12	113.64	76.83	89.54	71.77
107476550	BGI_novel_T002500,XM_016096381.2	52.71	30.37	28.8	46.03	30.57	43.7	84.75	49.8
BGI_novel_G004408	BGI_novel_T028366	52.69	36.15	39.26	63.19	20.49	18.85	17.42	14.45
107617626	XM_016319437.2	52.68	46.75	49.7	62.17	32.18	34.66	28.04	29.75
BGI_novel_G001016	BGI_novel_T006839	52.66	10.61	21.45	61.12	0	13.27	0	7.27
107463655	XM_016082491.2	52.66	62.39	51.08	48.59	100.55	79.06	50.04	77.19
107482523	BGI_novel_T003994,XM_016103053.1,XM_016103054.2	52.62	56.75	42.96	52.32	87.62	62	29.95	44.52
107487611	XM_016108278.2,XM_016108279.2	52.61	39.57	51.72	45.6	36.37	36.11	26.9	35.35
107477170	XM_016097141.2	52.61	35.63	67.54	86.85	25.87	39.13	25.25	27.35
107466445	XM_016085420.2	52.6	24.13	57.89	90.65	15.59	31.38	16.78	23.09
110281061	XR_002375502.1	52.59	50.96	162.41	91.81	9.58	1.6	12.31	10.21
107466974	XM_021131237.1,XM_021131238.1	52.58	57.11	36.41	47.94	65.6	59.72	36.72	54.37
107629044	XM_016331728.2	52.52	41.96	56.67	72.93	55.76	59.57	65.11	47.62
107474782	XM_016094419.2	52.51	44.28	65.79	67.86	39.83	42.8	33.07	37.72
BGI_novel_G000142	BGI_novel_T000768	52.47	40.69	57.94	63.27	48.85	54.12	40.16	44.41
107630356	XM_016333459.2	52.46	44.09	56.11	55.23	46.39	47.75	31.21	44.2
107460668	XM_016079053.2	52.45	43.03	59.52	60.7	37.88	43.1	36.22	42.89
107465889	XM_016084862.2	52.45	53.58	58.39	49.45	56.09	55.34	45.46	56.57
107606278	XM_016308314.2	52.44	33.03	42.86	40.68	25.51	27.06	15.76	21.6
107618412	BGI_novel_T025762,XM_016320468.2,XM_016320469.2	52.42	41.05	84.71	70.55	41.05	49.92	45.13	43.75
107489691	XM_016110443.2	52.42	42.96	63.24	70.48	85.97	74.62	75.64	88.73
107626264	XM_016329104.2	52.37	63.84	70.31	49.17	75.89	66.82	43.95	66.94
107614412	BGI_novel_T024353,XM_016316626.2	52.27	69.36	36.34	50.12	74.88	67.33	254.88	119.05
107629824	XM_016332727.2	52.27	40.92	43.42	58.08	46.15	52.39	39.15	48.53
107495049	XM_016116110.2	52.25	65.36	65.67	44.8	74.34	55.6	48.34	59.31
107462795	XM_016081457.2,XM_021129571.1,XM_021129572.1	52.24	54.95	76.54	54.02	19.98	18.37	15.06	18.13
107638201	XM_016341369.2	52.23	26.32	14.3	27.43	11.01	27.05	74.36	29.63
[truncated: 73,637 more rows]
